# Supplementary material for: Genome-wide analysis of the MADS-box gene family of sea buckthorn (Hippophae rhamnoides ssp. sinensis) and their potential role in floral organ development
Source: Frontiers journal article supplement (doi:10.3389/fpls.2024.1387613), 2024-06-13
Supplement: Image_1.pdf [file Image_1.pdf]

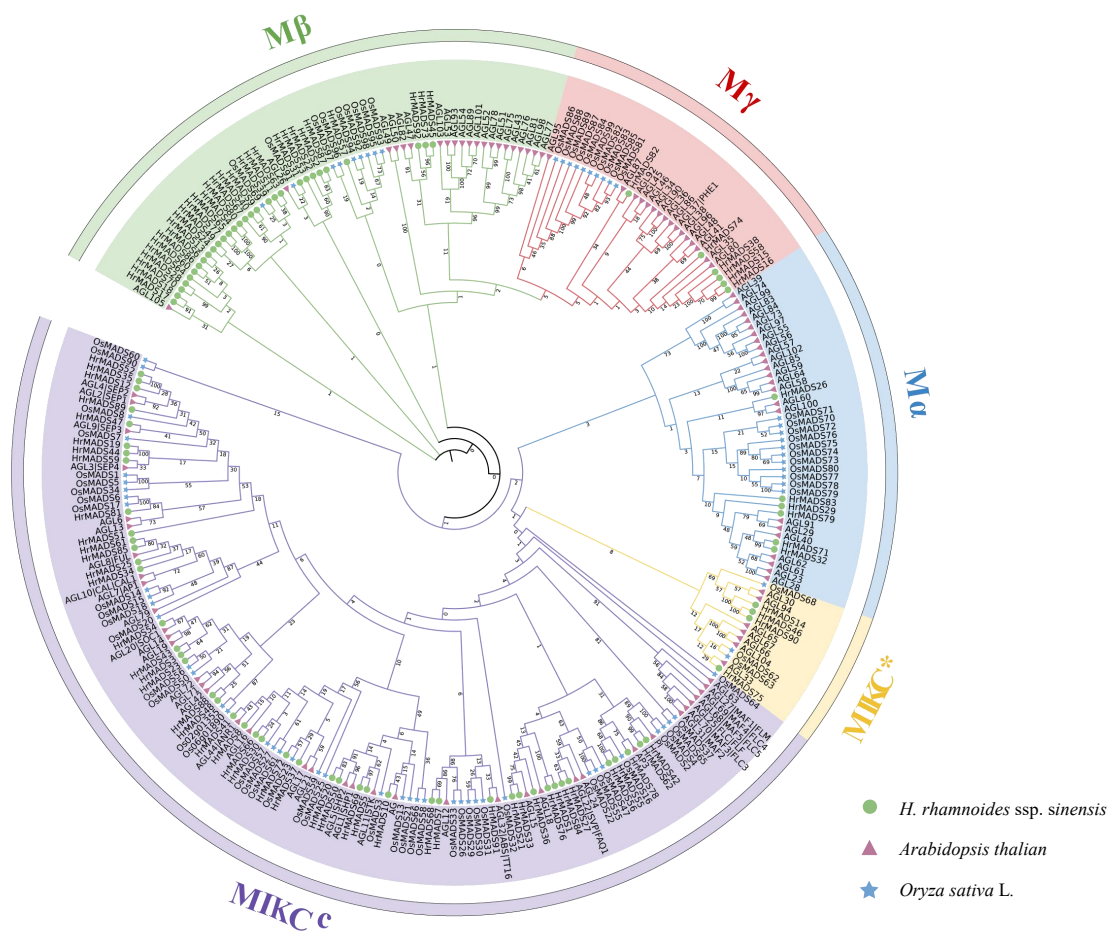

**Supplementary Figure 1.** Phylogenetic tree of MADS-box genes in *Arabidopsis thaliana*, *Oryza sativa L.*, and *H. rhamnoides ssp. sinensis*. The phylogenetic tree was constructed using the NJ method. Triangles represent MADS-box proteins in Arabidopsis, and blue stars and circles represent MADS-box proteins in rice and sea buckthorn, respectively. Different subfamilies are marked with specific colors.

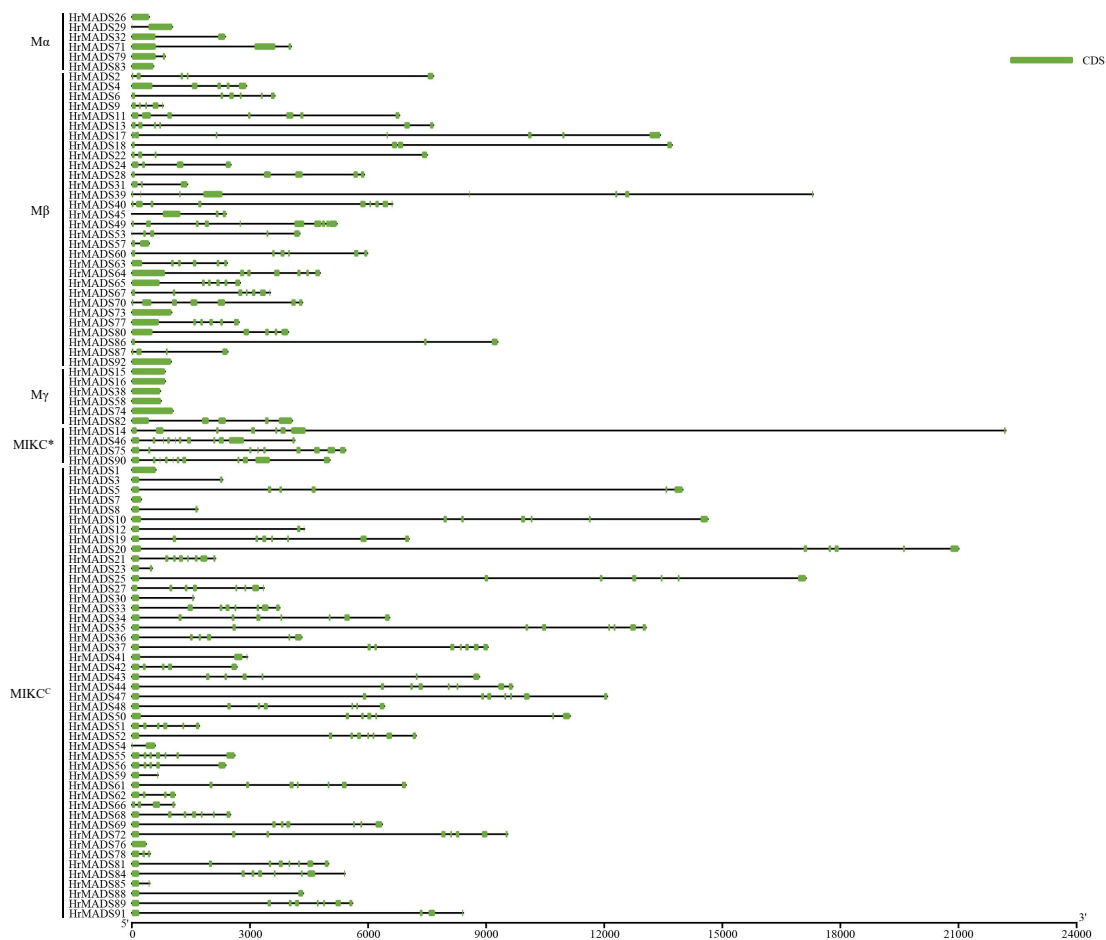

**Supplementary Figure 2.** Gene structure of the *HrMADS* genes. Green boxes indicate exons and gray lines indicate introns. The detailed number of exons per gene is shown in Supplemental Table S1.

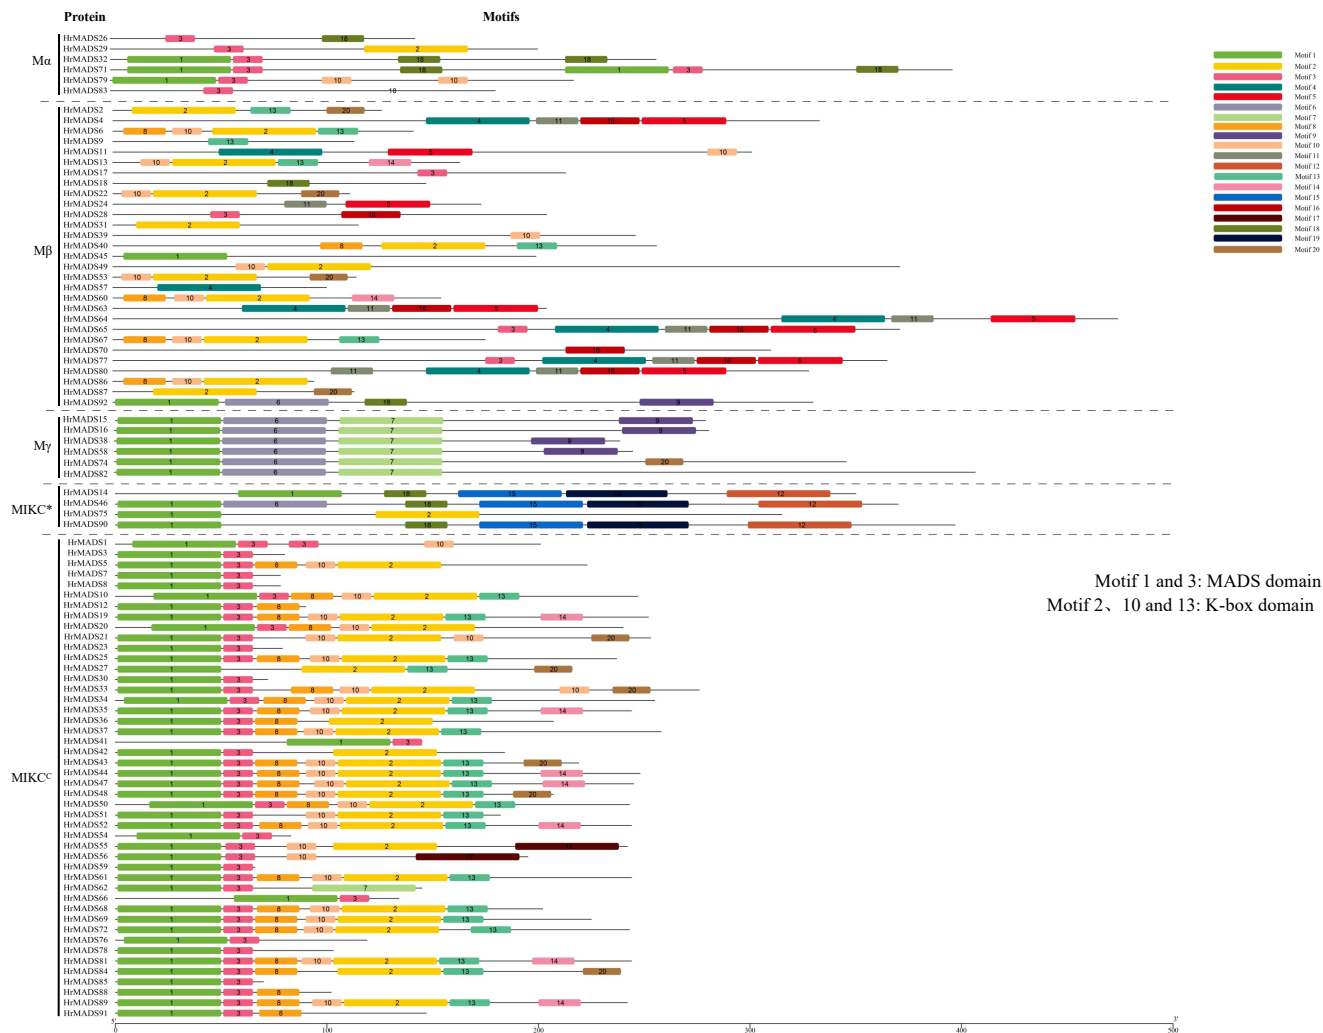

**Supplementary Figure 3.** Conserved structural domains of the *HrMADS* genes. Different motifs are represented by different colors, with detailed information on each domain in Supplementary Table S2.

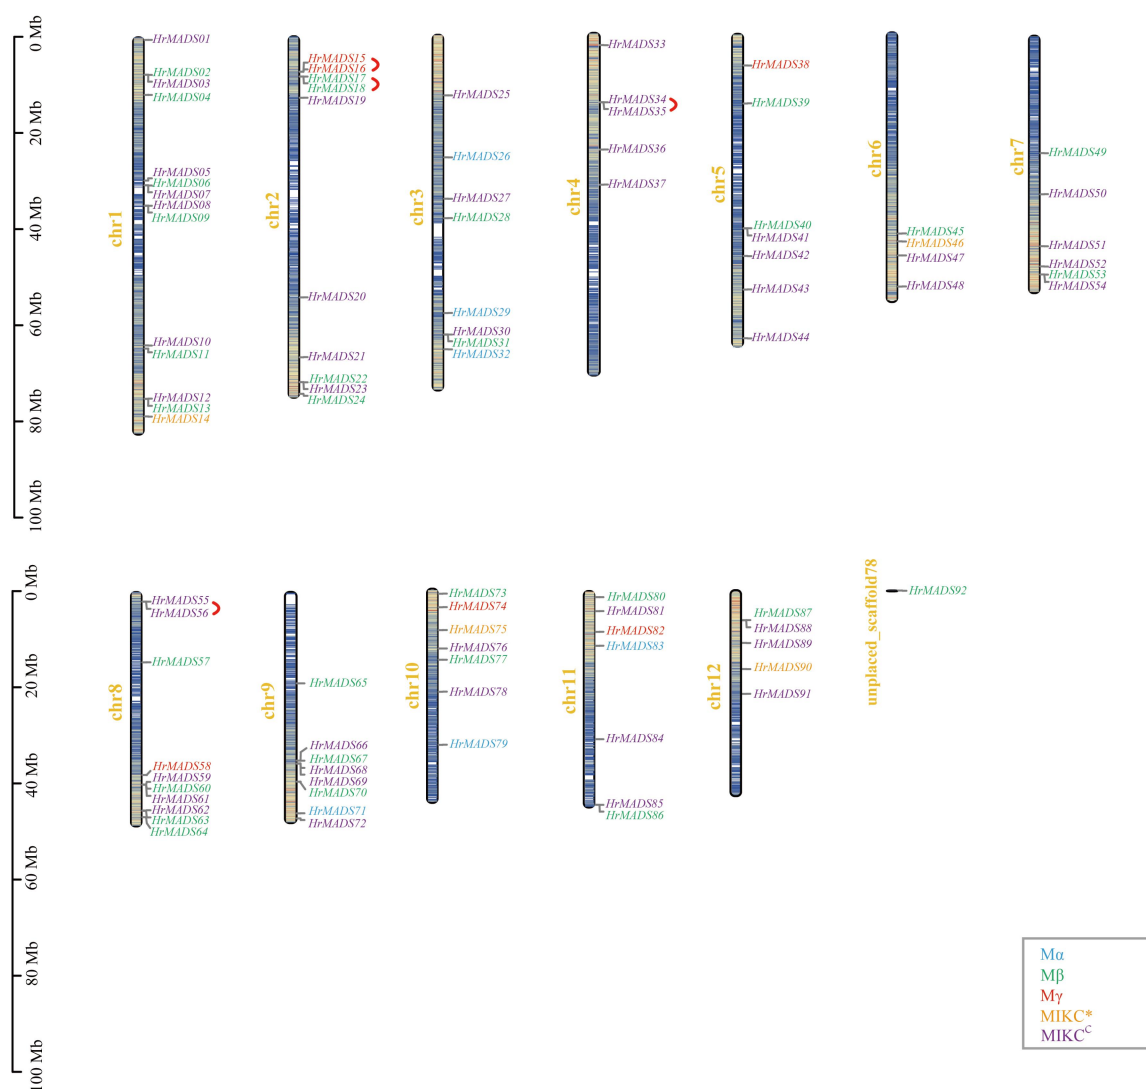

**Supplementary Figure 4.** Chromosomal distribution of the *HrMADS* genes. A total of 92 *HrMADS* genes are located on 12 chromosomes and 1 scaffold, and the color from blue to yellow on each chromosome indicates gene density. Genes from different subfamilies are shown in different colors. The red linkage represents tandem duplication.

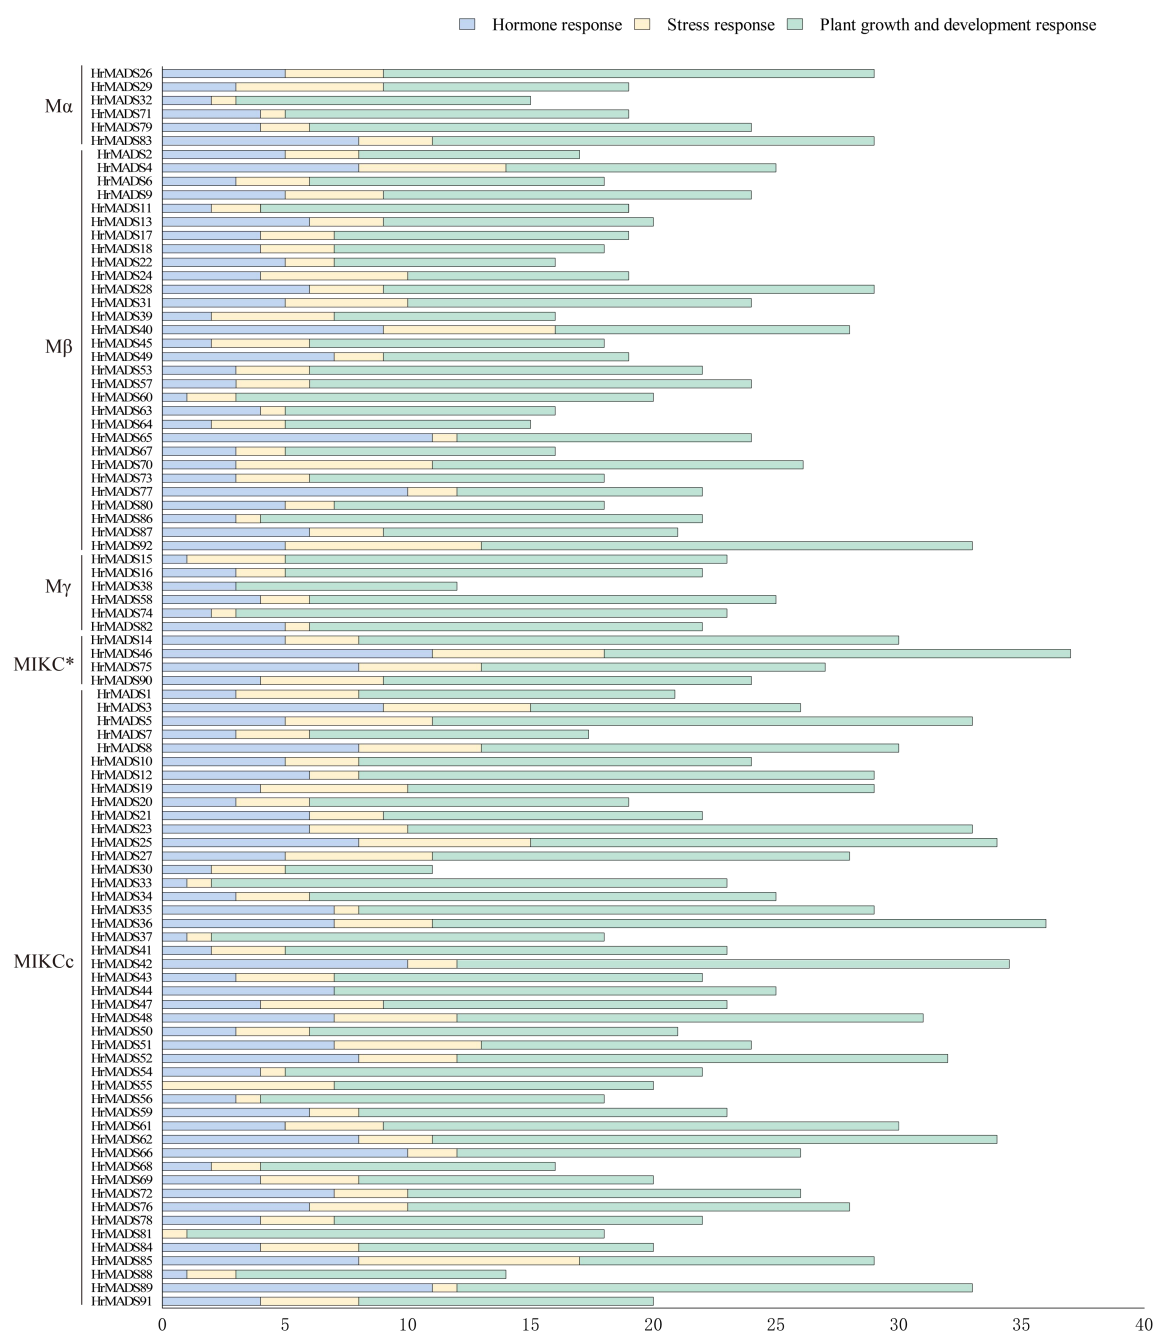

**Supplementary Figure 5.** Number of cis-acting regulatory elements of the *HrMADS* gene in *H. ramnoides* ssp. *sinensis*. Different color blocks represent different types of cis-acting elements. Detailed information for each CAE is listed in Supplementary Table S4 and S5.
