# Supplementary material for: Genome-wide analysis of the MADS-box gene family of sea buckthorn (Hippophae rhamnoides ssp. sinensis) and their potential role in floral organ development
Source: Front Plant Sci. 2024 Jun 13;15:1387613. doi: 10.3389/fpls.2024.1387613 (PMC11208494; doi:10.3389/fpls.2024.1387613)
Supplement: Supplementary file 2 [file Table_1.xlsx]

## Sheet: Table S1
Table S1 Detailed information regarding HrMADS genes family in Hippophae rhamnoides ssp. sinensis
Gene Name	Gene ID	Class	Chr	Physicochemical characteristics							SL	ORF	Exons	Origin
				MW (Da)	PI	Length (aa)	GRAVY	Instability Index(II)	Aliphatic Index	Stability
HrMADS1	Hiprha1gene28079	SVP	chr01	23073.4	7.73	201	-0.503	49.01	78.06	U	nucl	606	1	Dispersed
HrMADS2	Hiprha1gene13275	Mβ	chr01	14593.7	5.83	127	-0.763	77.77	88.98	U	cyto	384	5	WGD or Segmental
HrMADS3	Hiprha1gene13276	SOC1/TM3	chr01	8942.61	10.6	80	-0.101	42.67	85.12	U	nucl	243	2	WGD or Segmental
HrMADS4	Hiprha1gene18213	Mβ	chr01	36986	6.32	334	-0.278	41.27	79.01	U	chlo	1005	5	WGD or Segmental
HrMADS5	Hiprha1gene16187	AG/STK	chr01	25662.2	9.51	223	-0.66	48.3	82.69	U	nucl	672	6	WGD or Segmental
HrMADS6	Hiprha1gene23658	Mβ	chr01	16418.8	4.9	142	-0.394	67.2	83.1	U	cyto_nucl	429	6	WGD or Segmental
HrMADS7	Hiprha1gene23653	AGL12	chr01	9129.78	9.72	78	0.051	31.4	71.15	S	nucl	237	1	Dispersed
HrMADS8	Hiprha1gene01591	ANR1	chr01	8671.04	10.11	78	-0.31	45.98	86.28	U	nucl	237	2	Dispersed
HrMADS9	Hiprha1gene01596	Mβ	chr01	13083.9	6.29	114	-0.768	47.43	89.74	U	nucl	345	5	WGD or Segmental
HrMADS10	Hiprha1gene08093	AG/STK	chr01	28537.3	9.48	247	-0.847	55.93	79.8	U	nucl	744	7	Dispersed
HrMADS11	Hiprha1gene08073	Mβ	chr01	34136.7	9.29	302	-0.026	37.05	98.64	S	chlo	909	7	Dispersed
HrMADS12	Hiprha1gene28525	SEP	chr01	10294	9.72	90	-0.35	32.4	86.67	S	nucl	273	3	WGD or Segmental
HrMADS13	Hiprha1gene28524	Mβ	chr01	19131.7	5.21	164	-0.676	60.66	85.06	U	nucl	495	6	Dispersed
HrMADS14	Hiprha1gene25596	MIKC*	chr01	39530.8	7.09	350	-0.502	55.92	77.11	U	nucl	1053	8	WGD or Segmental
HrMADS15	Hiprha1gene24686	Mγ	chr02	32455.7	8.64	279	-0.585	40.69	74.01	U	cyto	840	1	WGD or Segmental
HrMADS16	Hiprha1gene24685	Mγ	chr02	32541.8	8.9	281	-0.578	40.6	70.04	U	cyto	846	1	Tandem
HrMADS17	Hiprha1gene25067	Mβ	chr02	25002.8	9.18	214	-0.213	28.55	86.12	S	cyto	645	7	WGD or Segmental
HrMADS18	Hiprha1gene25068	Mβ	chr02	17718.9	5.2	148	-1.011	46.56	74.39	U	cyto	447	4	Tandem
HrMADS19	Hiprha1gene11384	SEP	chr02	29527.3	7.72	252	-0.839	53.88	75.08	U	nucl	759	8	WGD or Segmental
HrMADS20	Hiprha1gene03103	AG/STK	chr02	27825.2	8.85	240	-0.793	54.73	72.75	U	nucl	723	6	WGD or Segmental
HrMADS21	Hiprha1gene06728	AGL15	chr02	29047.4	8.04	253	-0.657	61.79	91.82	U	nucl	762	8	WGD or Segmental
HrMADS22	Hiprha1gene06492	Mβ	chr02	13143.2	6.44	112	-0.924	41.27	82.77	U	cyto	339	4	WGD or Segmental
HrMADS23	Hiprha1gene06098	SOC1/TM3	chr02	9026.48	10.43	79	-0.147	44.23	94.94	U	nucl	240	2	WGD or Segmental
HrMADS24	Hiprha1gene06677	Mβ	chr02	19420.3	9.58	174	-0.155	40.65	85.57	U	cyto	525	4	Dispersed
HrMADS25	Hiprha1gene25693	SQUA	chr03	27720	9.15	237	-0.551	52.04	90.59	U	nucl	714	7	Dispersed
HrMADS26	Hiprha1gene30423	Mα	chr03	16469.6	5.67	144	-0.506	36.83	78.61	S	cyto	435	1	Dispersed
HrMADS27	Hiprha1gene15867	SVP	chr03	24560.8	6.37	216	-0.817	60.22	86.62	U	nucl	651	8	WGD or Segmental
HrMADS28	Hiprha1gene29416	Mβ	chr03	23445.8	6.23	205	-0.447	28.82	85.51	S	cyto	618	5	WGD or Segmental
HrMADS29	Hiprha1gene05013	Mα	chr03	22250.6	8.96	202	-0.455	48.23	72.97	U	nucl	609	1	Dispersed
HrMADS30	Hiprha1gene18374	ANR1	chr03	8141.65	10.29	72	0.024	42.77	105.56	U	nucl	219	2	WGD or Segmental
HrMADS31	Hiprha1gene18314	Mβ	chr03	13710.9	9.76	116	-0.767	55.57	77.33	U	cyto_nucl	351	3	WGD or Segmental
HrMADS32	Hiprha1gene14197	Mα	chr03	29778	7.7	258	-0.602	48.55	84.22	U	chlo	777	2	WGD or Segmental
HrMADS33	Hiprha1gene00085	AGL15	chr04	31454.1	6.28	276	-0.496	57.04	94.67	U	nucl	831	8	WGD or Segmental
HrMADS34	Hiprha1gene23344	SQUA	chr04	28990	9.08	255	-0.76	44.76	81.41	U	nucl	768	8	Tandem
HrMADS35	Hiprha1gene23579	SEP	chr04	28116.9	8.58	244	-0.766	49.06	75.53	U	nucl	735	8	WGD or Segmental
HrMADS36	Hiprha1gene12263	AGL15	chr04	23914.2	8.74	207	-0.8	63.19	72.51	U	nucl	624	6	Dispersed
HrMADS37	Hiprha1gene15754	ANR1	chr04	29764.9	9.4	258	-0.653	41.29	87.64	U	nucl	777	8	WGD or Segmental
HrMADS38	Hiprha1gene07335	Mγ	chr05	27542.3	9.42	239	-0.42	44.22	83.18	U	cyto	720	1	WGD or Segmental
HrMADS39	Hiprha1gene07849	Mβ	chr05	28367.3	7.8	247	-0.351	40.77	86.88	U	chlo	774	8	Proximal
HrMADS40	Hiprha1gene29009	Mβ	chr05	28786.1	9.34	257	-0.57	41.7	81.52	U	nucl	774	9	WGD or Segmental
HrMADS41	Hiprha1gene29010	ANR1	chr05	16254.9	10.69	145	-0.172	40.7	88.14	U	nucl	438	3	WGD or Segmental
HrMADS42	Hiprha1gene03316	PI	chr05	21438.5	8.9	184	-0.834	57.77	82.66	U	nucl	555	5	WGD or Segmental
HrMADS43	Hiprha1gene03514	SOC1/TM3	chr05	25393.2	9.43	219	-0.755	62.46	74.34	U	nucl	660	7	WGD or Segmental
HrMADS44	Hiprha1gene16220	SEP	chr05	28945.5	6.93	248	-0.871	57.47	75.12	U	nucl	747	8	WGD or Segmental
HrMADS45	Hiprha1gene17257	Mβ	chr06	23366.1	9.77	200	-0.53	48.25	83.25	U	cyto	603	4	WGD or Segmental
HrMADS46	Hiprha1gene16901	MIKC*	chr06	42068.5	6.23	370	-0.711	55.49	74.32	U	nucl	1113	11	WGD or Segmental
HrMADS47	Hiprha1gene16795	SEP	chr06	28284.3	8.19	245	-0.646	47.07	80.04	U	nucl	738	8	WGD or Segmental
HrMADS48	Hiprha1gene05776	SOC1/TM3	chr06	24005.4	8.71	207	-0.744	54.09	80.1	U	nucl	624	7	WGD or Segmental
HrMADS49	Hiprha1gene15528	Mβ	chr07	43184.4	9.79	372	0.349	43.84	127.82	U	plas	1119	10	Dispersed
HrMADS50	Hiprha1gene19609	AG/STK	chr07	28221.8	9.08	243	-0.834	50.53	76.26	U	nucl	732	7	WGD or Segmental
HrMADS51	Hiprha1gene22394	SQUA	chr07	21148.7	10.08	182	-0.569	59.73	89.56	U	nucl	549	6	Dispersed
HrMADS52	Hiprha1gene21656	SEP	chr07	27841.7	8.96	244	-0.659	46.74	75.98	U	nucl	735	8	WGD or Segmental
HrMADS53	Hiprha1gene22050	Mβ	chr07	13555.9	6.14	115	-0.688	29.76	93.3	S	cyto	348	5	WGD or Segmental
HrMADS54	Hiprha1gene22613	SOC1/TM3	chr07	9498.07	10.28	83	-0.141	36.34	92.77	S	nucl	252	2	WGD or Segmental
HrMADS55	Hiprha1gene02204	AP3	chr08	28095.9	9.29	242	-0.82	31.25	76.57	S	cyto	729	7	WGD or Segmental
HrMADS56	Hiprha1gene01881	AP3	chr08	22521.4	8.41	195	-0.757	38.52	74.56	S	cyto	588	5	Tandem
HrMADS57	Hiprha1gene05113	Mβ	chr08	11125	8.69	101	0.029	30.37	94.46	S	cyto	306	2	Dispersed
HrMADS58	Hiprha1gene04430	Mγ	chr08	28515.3	9.13	245	-0.569	43.57	71.22	U	nucl	738	1	WGD or Segmental
HrMADS59	Hiprha1gene10371	SEP	chr08	7721.19	10.02	66	-0.295	53.93	94.55	U	nucl	201	2	Dispersed
HrMADS60	Hiprha1gene10361	Mβ	chr08	17934	5.07	155	-0.813	42.45	75.55	U	nucl	468	6	WGD or Segmental
HrMADS61	Hiprha1gene10310	SQUA	chr08	28642.6	8.87	244	-0.766	49.25	83.11	U	nucl	735	8	Dispersed
HrMADS62	Hiprha1gene30211	PI	chr08	16611.2	8.5	145	-0.537	43.68	99.45	U	nucl	438	4	WGD or Segmental
HrMADS63	Hiprha1gene30209	Mβ	chr08	23848.6	9.13	205	-0.09	63.96	94.54	U	chlo	618	6	Dispersed
HrMADS64	Hiprha1gene30042	Mβ	chr08	53146.5	5.08	475	-0.382	43.59	74.42	U	nucl	1428	7	WGD or Segmental
HrMADS65	Hiprha1gene11946	Mβ	chr09	40754.3	7.58	372	-0.106	45.48	81.18	U	chlo	1119	6	WGD or Segmental
HrMADS66	Hiprha1gene11842	ANR1	chr09	14847.2	10.01	134	-0.027	43.07	93.81	U	cyto	405	4	WGD or Segmental
HrMADS67	Hiprha1gene11810	Mβ	chr09	20552.4	6.6	176	-0.911	52.04	83.01	U	cyto	531	7	WGD or Segmental
HrMADS68	Hiprha1gene11752	AGL12	chr09	23279	6.92	202	-0.365	60.93	90.74	U	chlo	609	7	WGD or Segmental
HrMADS69	Hiprha1gene11753	AG/STK	chr09	25878.6	9.33	225	-0.646	62.01	88.04	U	nucl	678	7	WGD or Segmental
HrMADS70	Hiprha1gene14663	Mβ	chr09	35139.5	9.24	311	-0.454	29.61	89.94	S	chlo	936	7	WGD or Segmental
HrMADS71	Hiprha1gene15231	Mα	chr09	45379.4	9.25	398	-0.464	56.67	83.29	U	chlo	1197	3	WGD or Segmental
HrMADS72	Hiprha1gene15066	ANR1	chr09	28140.1	9.25	243	-0.763	59.65	91.07	U	nucl	732	8	Dispersed
HrMADS73	Hiprha1gene19945	Mβ	chr10	38371.5	7.24	335	-0.529	47.98	75.97	U	nucl	1008	1	WGD or Segmental
HrMADS74	Hiprha1gene27022	Mγ	chr10	38807	8.97	346	-0.65	50.27	63.47	U	nucl	1041	1	Dispersed
HrMADS75	Hiprha1gene27564	MIKC*	chr10	35138.5	5	315	-0.508	56.93	80.19	U	nucl	948	9	Dispersed
HrMADS76	Hiprha1gene04025	SVP	chr10	13371.3	9.67	119	-0.574	53.47	69.58	U	mito	360	1	Dispersed
HrMADS77	Hiprha1gene11188	Mβ	chr10	40088.9	8.65	366	-0.046	49.7	84.13	U	chlo	1101	6	WGD or Segmental
HrMADS78	Hiprha1gene10973	AP3	chr10	12150.9	10.37	103	-0.895	72.76	74.76	U	nucl	312	3	WGD or Segmental
HrMADS79	Hiprha1gene29331	Mα	chr10	24756.5	9.97	219	-0.657	50.76	84.57	U	nucl	660	2	Dispersed
HrMADS80	Hiprha1gene28627	Mβ	chr11	36449.2	5.66	329	-0.305	38.16	76.96	S	chlo	990	5	WGD or Segmental
HrMADS81	Hiprha1gene26452	AGL6	chr11	27922.8	9.07	244	-0.714	42.04	77.5	U	nucl	735	8	Dispersed
HrMADS82	Hiprha1gene26350	Mγ	chr11	46566.5	9.52	407	-0.741	41.04	86.68	U	chlo	1224	5	Dispersed
HrMADS83	Hiprha1gene10571	Mα	chr11	21000.5	6.18	182	-0.871	60.11	63.79	U	nucl	549	1	WGD or Segmental
HrMADS84	Hiprha1gene29982	SVP	chr11	27229.8	6.48	239	-0.751	50.05	83.6	U	nucl	720	8	WGD or Segmental
HrMADS85	Hiprha1gene05361	SQUA	chr11	8177.71	10.17	70	-0.09	35.92	103	S	nucl	213	3	Dispersed
HrMADS86	Hiprha1gene05333	Mβ	chr11	11788.5	9.24	95	-0.671	42.78	83.16	U	nucl	288	3	Dispersed
HrMADS87	Hiprha1gene02664	Mβ	chr12	13349.3	8.51	114	-0.633	80.81	89.82	U	nucl	345	4	WGD or Segmental
HrMADS88	Hiprha1gene02412	SOC1/TM3	chr13	11903.8	10.01	102	-0.745	36.94	70.59	S	nucl	309	2	WGD or Segmental
HrMADS89	Hiprha1gene09797	SEP	chr14	27803.8	8.18	242	-0.625	48.01	81.82	U	nucl	729	8	WGD or Segmental
HrMADS90	Hiprha1gene24585	MIKC*	chr15	44927.8	6.64	397	-0.563	50.25	77.58	U	nucl	1194	11	WGD or Segmental
HrMADS91	Hiprha1gene18615	BS	chr16	17289	9.56	147	-0.723	45.9	86.87	U	nucl	444	4	Dispersed
HrMADS92	Hiprha1gene19450	Mβ	unplaced scaffold	38670.7	7.69	331	-0.782	47.96	63.6	U	nucl	996	1	Dispersed

## Sheet: Table S2
Table S2 Secondary structure of Hippophae rhamnoides ssp. sinensis MADS-box genes
Protein	Alpha helix	proportion/%	Extended strand	proportion/%	Beta turn	proportion/%	Random coil	proportion/%
HrMADS1	100	49.75	23	11.44	10	4.98	68	33.83
HrMADS2	97	76.38	4	3.15	0	0	26	20.47
HrMADS3	22	27.5	21	26.25	6	7.5	31	38.75
HrMADS4	38	11.38	80	23.95	19	5.69	197	58.98
HrMADS5	126	56.5	22	9.87	8	3.59	67	30.04
HrMADS6	87	61.27	15	10.56	2	1.41	38	26.76
HrMADS7	25	32.05	29	37.18	8	10.26	16	20.51
HrMADS8	31	39.74	23	29.49	9	11.54	15	19.23
HrMADS9	58	50.88	11	9.65	0	0	45	39.47
HrMADS10	127	51.42	21	8.5	7	2.83	92	37.25
HrMADS11	107	35.43	81	26.82	20	6.62	94	31.13
HrMADS12	36	40	20	22.22	8	8.89	26	28.89
HrMADS13	101	61.59	9	5.49	2	1.22	52	31.71
HrMADS14	103	29.43	62	17.71	15	4.29	170	48.57
HrMADS15	150	53.76	18	6.45	2	0.72	109	39.07
HrMADS16	132	46.98	15	5.34	4	1.42	130	46.26
HrMADS17	92	42.99	45	21.03	16	7.48	61	28.5
HrMADS18	110	74.32	8	5.41	6	4.05	24	16.22
HrMADS19	144	57.14	22	8.73	8	3.17	78	30.95
HrMADS20	127	52.92	23	9.58	12	5	78	32.5
HrMADS21	128	50.59	35	13.83	9	3.56	81	32.02
HrMADS22	74	66.07	3	2.68	1	0.89	34	30.36
HrMADS23	30	37.97	20	25.32	8	10.13	21	26.58
HrMADS24	26	14.94	55	31.61	11	6.32	82	47.13
HrMADS25	134	56.54	36	15.19	11	4.64	56	23.63
HrMADS26	97	67.36	10	6.94	4	2.78	33	22.92
HrMADS27	129	59.72	19	8.8	2	0.93	66	30.56
HrMADS28	80	39.02	33	16.1	10	4.88	82	40
HrMADS29	114	56.44	21	10.4	6	2.97	61	30.2
HrMADS30	26	36.11	21	29.17	11	15.28	14	19.44
HrMADS31	76	65.52	14	12.07	0	0	26	22.41
HrMADS32	130	50.39	38	14.73	14	5.43	76	29.46
HrMADS33	154	55.8	19	6.88	9	3.26	94	34.06
HrMADS34	128	50.2	21	8.24	6	2.35	100	39.22
HrMADS35	131	53.69	19	7.79	10	4.1	84	34.43
HrMADS36	114	55.07	24	11.59	7	3.38	62	29.95
HrMADS37	137	53.1	36	13.95	8	3.1	77	29.84
HrMADS38	120	50.21	20	8.37	4	1.67	95	39.75
HrMADS39	123	49.8	32	12.96	8	3.24	84	34.01
HrMADS40	139	54.09	21	8.17	5	1.95	92	35.8
HrMADS41	32	22.07	21	14.48	6	4.14	86	59.31
HrMADS42	111	60.33	23	12.5	6	3.26	44	23.91
HrMADS43	131	59.82	21	9.59	8	3.65	59	26.94
HrMADS44	125	50.4	21	8.47	8	3.23	94	37.9
HrMADS45	99	49.5	36	18	8	4	57	28.5
HrMADS46	168	45.41	27	7.3	8	2.16	167	45.14
HrMADS47	135	55.1	19	7.76	8	3.27	83	33.88
HrMADS48	130	62.8	21	10.14	9	4.35	47	22.71
HrMADS49	156	41.94	67	18.01	29	7.8	120	32.26
HrMADS50	135	55.56	25	10.29	8	3.29	75	30.86
HrMADS51	128	70.33	20	10.99	9	4.95	25	13.74
HrMADS52	131	53.69	19	7.79	9	3.69	85	34.84
HrMADS53	91	79.13	3	2.61	0	0	21	18.26
HrMADS54	26	31.33	23	27.71	14	16.87	20	24.1
HrMADS55	141	58.26	28	11.57	17	7.02	56	23.14
HrMADS56	90	46.15	32	16.41	22	11.28	51	26.15
HrMADS57	34	33.66	28	27.72	6	5.94	33	32.67
HrMADS58	130	53.06	17	6.94	6	2.45	92	37.55
HrMADS59	29	43.94	18	27.27	7	10.61	12	18.18
HrMADS60	106	68.39	4	2.58	0	0	45	29.03
HrMADS61	144	59.02	29	11.89	9	3.69	62	25.41
HrMADS62	80	55.17	27	18.62	13	8.97	25	17.24
HrMADS63	57	27.8	38	18.54	10	4.88	100	48.78
HrMADS64	144	30.32	99	20.84	37	7.79	195	41.05
HrMADS65	89	23.92	60	16.13	22	5.91	201	54.03
HrMADS66	32	23.88	49	36.57	17	12.69	36	26.87
HrMADS67	114	64.77	0	0	0	0	62	35.23
HrMADS68	128	63.37	22	10.89	8	3.96	44	21.78
HrMADS69	140	62.22	25	11.11	7	3.11	53	23.56
HrMADS70	112	36.01	68	21.86	23	7.4	108	34.73
HrMADS71	188	47.24	66	16.58	20	5.03	124	31.16
HrMADS72	141	58.02	27	11.11	8	3.29	67	27.57
HrMADS73	117	34.93	35	10.45	7	2.09	176	52.54
HrMADS74	108	31.21	13	3.76	6	1.73	219	63.29
HrMADS75	111	35.24	36	11.43	12	3.81	156	49.52
HrMADS76	54	45.38	20	16.81	10	8.4	35	29.41
HrMADS77	82	22.4	67	18.31	21	5.74	196	53.55
HrMADS78	43	41.75	21	20.39	12	11.65	27	26.21
HrMADS79	115	52.51	39	17.81	26	11.87	39	17.81
HrMADS80	44	13.37	61	18.54	21	6.38	203	61.7
HrMADS81	127	52.05	19	7.79	8	3.28	90	36.89
HrMADS82	175	43	76	18.67	22	5.41	134	32.92
HrMADS83	104	57.14	18	9.89	8	4.4	52	28.57
HrMADS84	144	60.25	25	10.46	8	3.35	62	25.94
HrMADS85	20	28.57	27	38.75	11	15.71	12	17.14
HrMADS86	77	81.05	5	5.26	1	1.05	12	12.63
HrMADS87	94	82.46	5	4.39	0	0	15	13.16
HrMADS88	46	45.1	21	20.59	6	5.88	29	28.43
HrMADS89	138	57.02	24	9.92	10	4.13	70	28.93
HrMADS90	140	35.26	55	13.85	13	3.27	189	47.61
HrMADS91	88	59.86	20	13.61	11	7.48	28	19.05
HrMADS92	113	34.14	37	11.18	16	4.83	165	49.85

## Sheet: Table S3
Table S3 Motif sequences identified by MEME tools in Hippophae rhamnoides ssp. sinensis MADS proteins and predicted functional annotation.
Motifs	Motif sequences	Motif logo	Motif width	E-value	Predicted function
Motif 1	MGRGKVZJKRIENKTNRQVTFSKRRNGLLKKAYELSVLCDAEVALIIFSP		50	4.2e-2019	MADS domain
Motif 2	QRTQRQLLGEDLGSLSLKELQQLERQLEMSLKQIRSRKNQJMLDZJEDLQ		50	6.5e-627	K-box
Motif 3	RGKLYEFASSSVMST		15	2.5e-153	MADS domain
Motif 4	FVAEPRYIPSLSMYPTLDVGDRILAEKVSYYFRKPCVNDIVIFKAPPVLQ		50	7e-130	Petidase-S26
Motif 5	RVPEGHVFVMGDNRNNSYDSHVWGPLPIKNIVGRSVFRYWP		41	2.2e-97	Petidase-S26
Motif 6	YDSQPEVFPSPLGVQRVISKFKRMPZMEQCKKMVNQEGFIKQRISKINDQ		50	7.3e-91	Unknow
Motif 7	KDNREKEMTRVMFQSLIGMGLHGLNMLDFNDLNWLISQNLKDIQKRMENL		50	1.4e-61	Unknow
Motif 8	JERYQKYSYGSQEVSSSAEEA		21	1.5e-55	Unknow
Motif 9	QRQPWFNDVVNPQENVGFDGEDLIMPFEDQNFNAIW		36	1.3e-47	Unknow
Motif 10	WQQEYSKLKAKJESL		15	6.6e-43	K-box
Motif 11	GYTDDDVFIKRIVAKEGDLVE		21	1.1e-41	Unknow
Motif 12	ELNPAENPLDYHVNGNFEFPRPGYDTNQHSWASTSGPCGVSMFDEQLYSQ		50	1.6e-41	Unknow
Motif 13	KKEHLLREENKELKKKVEEI		20	2e-41	K-box
Motif 14	PQSDGFFHPLECNPTLQIGYQ		21	5.6e-41	Unknow
Motif 15	QKQHLMSLECTDQFQNGIHMPFRMGAEQHLQPLSWISNNDSQRJVLPEDP		50	2.2e-33	Unknow
Motif 16	VHEGKLLVNGVEREEEFILEPLAYEMTPT		29	1.6e-28	Unknow
Motif 17	EDHYNEGEYESEVALANGASNLYAFRNHHHHPANLYHNGGEGFAPCYMRD		50	6.7e-26	Unknow
Motif 18	WWENPIEILDLEQLZQMESSL		21	3.2e-25	Unknow
Motif 19	LLPQQDVECSGSSSFGSYSGYFSTGKTSEMSNSGQENGIVNELSKTVPM		49	3.7e-28	Unknow
Motif 20	SSESSEVETELFJGLPETR		19	8.7e-24	Unknow

## Sheet: Table S4
Table S4 The Gene collinearity of MADS-box genes from Hippophae rhamnoides ssp. sinensis
Gene name	Gene ID	Chro	From	To	Gene name	Gene ID	Chro	From	To
HrMADS2	Hiprha1gene13275	chr1	7774056	7781714	HrMADS22	Hiprha1gene06492	chr2	71882375	71889874
HrMADS2	Hiprha1gene13275	chr1	7774056	7781714	HrMADS43	Hiprha1gene03514	chr5	53054871	53063695
HrMADS3	Hiprha1gene13276	chr1	7797661	7799961	HrMADS23	Hiprha1gene06098	chr2	71908603	71909116
HrMADS4	Hiprha1gene18213	chr1	11981934	11984840	HrMADS64	Hiprha1gene30042	chr8	46823776	46828554
HrMADS4	Hiprha1gene18213	chr1	11981934	11984840	HrMADS80	Hiprha1gene28627	chr11	1259805	1263778
HrMADS5	Hiprha1gene16187	chr1	29792992	29806982	HrMADS69	Hiprha1gene11753	chr9	35753761	35760119
HrMADS6	Hiprha1gene23658	chr1	30779658	30783284	HrMADS68	Hiprha1gene11752	chr9	35688822	35691322
HrMADS9	Hiprha1gene01596	chr1	35055086	35055877	HrMADS31	Hiprha1gene18314	chr3	62341206	62342614
HrMADS9	Hiprha1gene01596	chr1	35055086	35055877	HrMADS40	Hiprha1gene29009	chr5	40315242	40321860
HrMADS9	Hiprha1gene01596	chr1	35055086	35055877	HrMADS67	Hiprha1gene11810	chr9	35125189	35128703
HrMADS12	Hiprha1gene28525	chr1	75194531	75198911	HrMADS47	Hiprha1gene16795	chr6	46581862	46593937
HrMADS12	Hiprha1gene28525	chr1	75194531	75198911	HrMADS89	Hiprha1gene09797	chr12	10766980	10772581
HrMADS14	Hiprha1gene25596	chr1	78836625	78858823	HrMADS46	Hiprha1gene16901	chr6	43660284	43664416
HrMADS14	Hiprha1gene25596	chr1	78836625	78858823	HrMADS90	Hiprha1gene24585	chr12	16202533	16207559
HrMADS15	Hiprha1gene24686	chr2	7332787	7333626	HrMADS38	Hiprha1gene07335	chr5	6444835	6445554
HrMADS15	Hiprha1gene24686	chr2	7332787	7333626	HrMADS58	Hiprha1gene04430	chr8	38044599	38045336
HrMADS19	Hiprha1gene11384	chr2	12746965	12754002	HrMADS44	Hiprha1gene16220	chr5	63181334	63191003
HrMADS19	Hiprha1gene11384	chr2	12746965	12754002	HrMADS60	Hiprha1gene10361	chr8	40049550	40055530
HrMADS20	Hiprha1gene03103	chr2	54267006	54288008	HrMADS50	Hiprha1gene19609	chr7	33059720	33070849
HrMADS21	Hiprha1gene06728	chr2	66735423	66737542	HrMADS33	Hiprha1gene00085	chr4	2435612	2439364
HrMADS22	Hiprha1gene06492	chr2	71882375	71889874	HrMADS48	Hiprha1gene05776	chr6	53063080	53069494
HrMADS22	Hiprha1gene06492	chr2	71882375	71889874	HrMADS53	Hiprha1gene22050	chr7	49734354	49738616
HrMADS23	Hiprha1gene06098	chr2	71908603	71909116	HrMADS54	Hiprha1gene22613	chr7	49750107	49750695
HrMADS28	Hiprha1gene29416	chr3	38115675	38121578	HrMADS70	Hiprha1gene14663	chr9	39492189	39496519
HrMADS29	Hiprha1gene05013	chr3	57856928	57857951	HrMADS84	Hiprha1gene29982	chr11	30804707	30810116
HrMADS30	Hiprha1gene18374	chr3	62307022	62308591	HrMADS37	Hiprha1gene15754	chr4	31471689	31480731
HrMADS30	Hiprha1gene18374	chr3	62307022	62308591	HrMADS41	Hiprha1gene29010	chr5	40338734	40341667
HrMADS30	Hiprha1gene18374	chr3	62307022	62308591	HrMADS66	Hiprha1gene11842	chr9	35108817	35109902
HrMADS31	Hiprha1gene18314	chr3	62341206	62342614	HrMADS40	Hiprha1gene29009	chr5	40315242	40321860
HrMADS31	Hiprha1gene18314	chr3	62341206	62342614	HrMADS67	Hiprha1gene11810	chr9	35125189	35128703
HrMADS32	Hiprha1gene14197	chr3	65387380	65389749	HrMADS71	Hiprha1gene15231	chr9	46075437	46079481
HrMADS34	Hiprha1gene23344	chr4	14310551	14317095	HrMADS52	Hiprha1gene21656	chr7	48054893	48062110
HrMADS37	Hiprha1gene15754	chr4	31471689	31480731	HrMADS67	Hiprha1gene11810	chr9	35125189	35128703
HrMADS38	Hiprha1gene07335	chr5	6444835	6445554	HrMADS58	Hiprha1gene04430	chr8	38044599	38045336
HrMADS40	Hiprha1gene29009	chr5	40315242	40321860	HrMADS67	Hiprha1gene11810	chr9	35125189	35128703
HrMADS41	Hiprha1gene29010	chr5	40338734	40341667	HrMADS66	Hiprha1gene11842	chr9	35108817	35109902
HrMADS42	Hiprha1gene03316	chr5	46071645	46074310	HrMADS62	Hiprha1gene30211	chr8	45431535	45432629
HrMADS44	Hiprha1gene16220	chr5	63181334	63191003	HrMADS52	Hiprha1gene21656	chr7	48054893	48062110
HrMADS44	Hiprha1gene16220	chr5	63181334	63191003	HrMADS60	Hiprha1gene10361	chr8	40049550	40055530
HrMADS48	Hiprha1gene05776	chr6	53063080	53069494	HrMADS54	Hiprha1gene22613	chr7	49750107	49750695
HrMADS59	Hiprha1gene10371	chr8	40047025	40047686	HrMADS19	Hiprha1gene11384	chr2	12746965	12754002
HrMADS59	Hiprha1gene10371	chr8	40047025	40047686	HrMADS44	Hiprha1gene16220	chr5	63181334	63191003
HrMADS66	Hiprha1gene11842	chr9	35108817	35109902	HrMADS37	Hiprha1gene15754	chr4	31471689	31480731
HrMADS73	Hiprha1gene19945	chr10	1286076	1287083	HrMADS45	Hiprha1gene17257	chr6	42051576	42053964
HrMADS77	Hiprha1gene11188	chr10	15018375	15021090	HrMADS65	Hiprha1gene11946	chr9	19040467	19043216
HrMADS78	Hiprha1gene10973	chr10	21679782	21680243	HrMADS55	Hiprha1gene02204	chr8	1989517	1992126
HrMADS80	Hiprha1gene28627	chr11	1259805	1263778	HrMADS64	Hiprha1gene30042	chr8	46823776	46828554
HrMADS81	Hiprha1gene26452	chr11	4169970	4174963	HrMADS43	Hiprha1gene03514	chr5	53054871	53063695
HrMADS81	Hiprha1gene26452	chr11	4169970	4174963	HrMADS48	Hiprha1gene05776	chr6	53063080	53069494
HrMADS83	Hiprha1gene10571	chr11	11378400	11378948	HrMADS17	Hiprha1gene25067	chr2	8320523	8333944
HrMADS84	Hiprha1gene29982	chr11	30804707	30810116	HrMADS27	Hiprha1gene15867	chr3	34062890	34066242
HrMADS87	Hiprha1gene02664	chr12	6049482	6051913	HrMADS22	Hiprha1gene06492	chr2	71882375	71889874
HrMADS87	Hiprha1gene02664	chr12	6049482	6051913	HrMADS48	Hiprha1gene05776	chr6	53063080	53069494
HrMADS87	Hiprha1gene02664	chr12	6049482	6051913	HrMADS53	Hiprha1gene22050	chr7	49734354	49738616
HrMADS88	Hiprha1gene02412	chr12	6062141	6066491	HrMADS54	Hiprha1gene22613	chr7	49750107	49750695
HrMADS89	Hiprha1gene09797	chr12	10766980	10772581	HrMADS47	Hiprha1gene16795	chr6	46581862	46593937
HrMADS90	Hiprha1gene24585	chr12	16202533	16207559	HrMADS46	Hiprha1gene16901	chr6	43660284	43664416

## Sheet: Table S5
Table S5 Ka/Ks ratios of duplication gene pairs in Hippophae rhamnoides ssp. sinensis
Gene pairs		Ka	Ks	Ka/Ks	Selective pressure
HrMADS2	HrMADS22	0.39133	NaN	NaN	purifying selection
HrMADS2	HrMADS43	0.166045	0.387423	0.428587	purifying selection
HrMADS3	HrMADS23	0.215882	2.08058	0.10376	purifying selection
HrMADS4	HrMADS64	0.322136	0.684837	0.470384	purifying selection
HrMADS4	HrMADS80	0.131705	0.522412	0.252109	purifying selection
HrMADS5	HrMADS69	0.0493357	0.410231	0.120263	purifying selection
HrMADS6	HrMADS68	0.111537	0.654825	0.170332	purifying selection
HrMADS9	HrMADS31	0.404774	1.10201	0.367304	purifying selection
HrMADS9	HrMADS40	0.075812	0.254516	0.297868	purifying selection
HrMADS9	HrMADS67	0.109393	0.38196	0.286398	purifying selection
HrMADS12	HrMADS47	0.0169979	0.305619	0.055618	purifying selection
HrMADS12	HrMADS89	0.0783871	0.382445	0.204963	purifying selection
HrMADS14	HrMADS46	0.15595	0.393409	0.396408	purifying selection
HrMADS14	HrMADS90	0.161534	0.488171	0.330896	purifying selection
HrMADS15	HrMADS38	0.137046	0.484809	0.282681	purifying selection
HrMADS15	HrMADS58	0.184483	0.59024	0.312556	purifying selection
HrMADS19	HrMADS44	0.107924	0.31133	0.346655	purifying selection
HrMADS19	HrMADS60	0.204187	0.566036	0.360732	purifying selection
HrMADS20	HrMADS50	0.0622522	0.257659	0.241607	purifying selection
HrMADS21	HrMADS33	0.147204	0.429976	0.342354	purifying selection
HrMADS22	HrMADS48	0.348291	2.29159	0.151987	purifying selection
HrMADS22	HrMADS53	0.250137	0.781977	0.319877	purifying selection
HrMADS23	HrMADS54	0.110382	0.341167	0.323543	purifying selection
HrMADS28	HrMADS70	0.154629	0.301184	0.513405	purifying selection
HrMADS29	HrMADS84	0.585187	NaN	NaN	purifying selection
HrMADS30	HrMADS37	0.252904	1.17876	0.214551	purifying selection
HrMADS30	HrMADS41	0.0874607	0.325186	0.268956	purifying selection
HrMADS30	HrMADS66	0.136741	0.240955	0.567497	purifying selection
HrMADS31	HrMADS40	0.435669	1.49774	0.290884	purifying selection
HrMADS31	HrMADS67	0.4375	1.16044	0.377011	purifying selection
HrMADS32	HrMADS71	0.145149	0.484139	0.299808	purifying selection
HrMADS34	HrMADS52	0.488376	NaN	NaN	purifying selection
HrMADS37	HrMADS67	0.251022	1.21111	0.207267	purifying selection
HrMADS38	HrMADS58	0.190484	0.510129	0.373404	purifying selection
HrMADS40	HrMADS67	0.133147	0.513838	0.259123	purifying selection
HrMADS41	HrMADS66	0.277056	0.869263	0.318725	purifying selection
HrMADS42	HrMADS62	0.196941	0.523716	0.376044	purifying selection
HrMADS44	HrMADS52	0.353604	1.1594	0.304988	purifying selection
HrMADS44	HrMADS60	0.192742	0.424038	0.454539	purifying selection
HrMADS48	HrMADS54	0.240107	NaN	NaN	purifying selection
HrMADS59	HrMADS19	0.151228	0.36834	0.410566	purifying selection
HrMADS59	HrMADS44	0.0935342	0.269531	0.347026	purifying selection
HrMADS66	HrMADS37	0.247009	1.17173	0.210808	purifying selection
HrMADS73	HrMADS45	0.334571	0.967517	0.345803	purifying selection
HrMADS77	HrMADS65	0.13123	0.441222	0.297425	purifying selection
HrMADS78	HrMADS55	0.363885	NaN	NaN	purifying selection
HrMADS80	HrMADS64	0.287177	0.641789	0.447464	purifying selection
HrMADS81	HrMADS43	0.579477	1.68522	0.343859	purifying selection
HrMADS81	HrMADS48	0.517719	NaN	NaN	purifying selection
HrMADS83	HrMADS17	0.37314	1.47866	0.252349	purifying selection
HrMADS84	HrMADS27	0.0965374	0.37738	0.25581	purifying selection
HrMADS87	HrMADS22	0.492757	NaN	NaN	purifying selection
HrMADS87	HrMADS48	0.222753	0.677978	0.328556	purifying selection
HrMADS87	HrMADS53	0.418205	NaN	NaN	purifying selection
HrMADS88	HrMADS54	0.295495	2.83473	0.104241	purifying selection
HrMADS89	HrMADS47	0.0690251	0.386763	0.178469	purifying selection
HrMADS90	HrMADS46	0.113603	0.337931	0.336172	purifying selection

## Sheet: Table S6
Table S6 The cis-acting elements of MADS genes promoter regions from Hippophae rhamnoides ssp. sinensis
Gene Name	Cis-acting Elements	Sequence	Length	Strand	Organism	Function
HrMADS1	ARE	AAACCA	6	-	Zea mays	cis-acting regulatory element essential for the anaerobic induction
HrMADS1	ARE	AAACCA	6	-	Zea mays	cis-acting regulatory element essential for the anaerobic induction
HrMADS1	ARE	AAACCA	6	-	Zea mays	cis-acting regulatory element essential for the anaerobic induction
HrMADS1	Box 4	ATTAAT	6	+	Petroselinum crispum	part of a conserved DNA module involved in light responsiveness
HrMADS1	Box 4	ATTAAT	6	-	Petroselinum crispum	part of a conserved DNA module involved in light responsiveness
HrMADS1	Box 4	ATTAAT	6	-	Petroselinum crispum	part of a conserved DNA module involved in light responsiveness
HrMADS1	Box 4	ATTAAT	6	-	Petroselinum crispum	part of a conserved DNA module involved in light responsiveness
HrMADS1	Box 4	ATTAAT	6	-	Petroselinum crispum	part of a conserved DNA module involved in light responsiveness
HrMADS1	Box 4	ATTAAT	6	-	Petroselinum crispum	part of a conserved DNA module involved in light responsiveness
HrMADS1	CAT-box	GCCACT	6	-	Arabidopsis thaliana	cis-acting regulatory element related to meristem expression
HrMADS1	CGTCA-motif	CGTCA	5	-	Hordeum vulgare	cis-acting regulatory element involved in the MeJA-responsiveness
HrMADS1	circadian	CAAAGATATC	9	+	Lycopersicon esculentum	cis-acting regulatory element involved in circadian control
HrMADS1	circadian	CAAAGATATC	9	+	Lycopersicon esculentum	cis-acting regulatory element involved in circadian control
HrMADS1	GATA-motif	AAGATAAGATT	10	-	Arabidopsis thaliana	part of a light responsive element
HrMADS1	GT1-motif	GGTTAAT	7	+	Avena sativa	light responsive element
HrMADS1	MBS	CAACTG	6	+	Arabidopsis thaliana	MYB binding site involved in drought-inducibility
HrMADS1	TCA-element	CCATCTTTTT	9	-	Nicotiana tabacum	cis-acting element involved in salicylic acid responsiveness
HrMADS1	TC-rich repeats	ATTCTCTAAC	9	-	Nicotiana tabacum	cis-acting element involved in defense and stress responsiveness
HrMADS1	TCT-motif	TCTTAC	6	+	Arabidopsis thaliana	part of a light responsive element
HrMADS1	TCT-motif	TCTTAC	6	+	Arabidopsis thaliana	part of a light responsive element
HrMADS1	TGACG-motif	TGACG	5	+	Hordeum vulgare	cis-acting regulatory element involved in the MeJA-responsiveness
HrMADS10	ABRE	ACGTG	5	+	Arabidopsis thaliana	cis-acting element involved in the abscisic acid responsiveness
HrMADS10	ABRE	TACGGTC	7	+	Arabidopsis thaliana	cis-acting element involved in the abscisic acid responsiveness
HrMADS10	AE-box	AGAAACAA	8	+	Arabidopsis thaliana	part of a module for light response
HrMADS10	ARE	AAACCA	6	-	Zea mays	cis-acting regulatory element essential for the anaerobic induction
HrMADS10	ARE	AAACCA	6	-	Zea mays	cis-acting regulatory element essential for the anaerobic induction
HrMADS10	ATCT-motif	AATCTAATCC	9	+	Pisum sativum	part of a conserved DNA module involved in light responsiveness
HrMADS10	Box 4	ATTAAT	6	+	Petroselinum crispum	part of a conserved DNA module involved in light responsiveness
HrMADS10	Box 4	ATTAAT	6	+	Petroselinum crispum	part of a conserved DNA module involved in light responsiveness
HrMADS10	Box 4	ATTAAT	6	+	Petroselinum crispum	part of a conserved DNA module involved in light responsiveness
HrMADS10	Box 4	ATTAAT	6	-	Petroselinum crispum	part of a conserved DNA module involved in light responsiveness
HrMADS10	Box 4	ATTAAT	6	-	Petroselinum crispum	part of a conserved DNA module involved in light responsiveness
HrMADS10	chs-CMA1a	TTACTTAA	8	+	Daucus carota	part of a light responsive element
HrMADS10	GATA-motif	AAGATAAGATT	10	-	Arabidopsis thaliana	part of a light responsive element
HrMADS10	G-box	TACGTG	6	+	Arabidopsis thaliana	cis-acting regulatory element involved in light responsiveness
HrMADS10	GT1-motif	GGTTAAT	7	+	Avena sativa	light responsive element
HrMADS10	GT1-motif	GGTTAAT	7	-	Avena sativa	light responsive element
HrMADS10	GT1-motif	GGTTAA	6	-	Arabidopsis thaliana	light responsive element
HrMADS10	I-box	AGATAAGG	8	+	Triticum aestivum	part of a light responsive element
HrMADS10	P-box	CCTTTTG	7	+	Oryza sativa	gibberellin-responsive element
HrMADS10	TATC-box	TATCCCA	7	+	Oryza sativa	cis-acting element involved in gibberellin-responsiveness
HrMADS10	TCCC-motif	TCTCCCT	7	-	Spinacia oleracea	part of a light responsive element
HrMADS10	TC-rich repeats	ATTCTCTAAC	9	+	Nicotiana tabacum	cis-acting element involved in defense and stress responsiveness
HrMADS10	TCT-motif	TCTTAC	6	-	Arabidopsis thaliana	part of a light responsive element
HrMADS10	TGA-element	AACGAC	6	-	Brassica oleracea	auxin-responsive element
HrMADS11	ABRE	ACGTG	5	+	Arabidopsis thaliana	cis-acting element involved in the abscisic acid responsiveness
HrMADS11	ARE	AAACCA	6	+	Zea mays	cis-acting regulatory element essential for the anaerobic induction
HrMADS11	ARE	AAACCA	6	-	Zea mays	cis-acting regulatory element essential for the anaerobic induction
HrMADS11	AT1-motif	AATTATTTTTTATT	13	-	Solanum tuberosum	part of a light responsive module
HrMADS11	Box 4	ATTAAT	6	+	Petroselinum crispum	part of a conserved DNA module involved in light responsiveness
HrMADS11	Box 4	ATTAAT	6	-	Petroselinum crispum	part of a conserved DNA module involved in light responsiveness
HrMADS11	Box 4	ATTAAT	6	-	Petroselinum crispum	part of a conserved DNA module involved in light responsiveness
HrMADS11	CCAAT-box	CAACGG	6	-	Hordeum vulgare	MYBHv1 binding site
HrMADS11	chs-CMA2a	TCACTTGA	8	+	Petroselinum crispum	part of a light responsive element
HrMADS11	GATA-motif	GATAGGA	7	-	Arabidopsis thaliana	part of a light responsive element
HrMADS11	GATA-motif	GATAGGA	7	-	Arabidopsis thaliana	part of a light responsive element
HrMADS11	GATA-motif	GATAGGA	7	-	Arabidopsis thaliana	part of a light responsive element
HrMADS11	G-Box	CACGTT	6	-	Pisum sativum	cis-acting regulatory element involved in light responsiveness
HrMADS11	GCN4_motif	TGAGTCA	7	-	Oryza sativa	cis-regulatory element involved in endosperm expression
HrMADS11	GCN4_motif	TGAGTCA	7	-	Oryza sativa	cis-regulatory element involved in endosperm expression
HrMADS11	GT1-motif	GGTTAA	6	+	Arabidopsis thaliana	light responsive element
HrMADS11	O2-site	GATGATGTGG	9	+	Zea mays	cis-acting regulatory element involved in zein metabolism regulation
HrMADS11	TATC-box	TATCCCA	7	+	Oryza sativa	cis-acting element involved in gibberellin-responsiveness
HrMADS12	A-box	CCGTCC	6	+	Petroselinum crispum	cis-acting regulatory element
HrMADS12	ABRE	ACGTG	5	-	Arabidopsis thaliana	cis-acting element involved in the abscisic acid responsiveness
HrMADS12	ARE	AAACCA	6	+	Zea mays	cis-acting regulatory element essential for the anaerobic induction
HrMADS12	AT-rich sequence	TAAAATACT	9	+	Pisum sativum	element for maximal elicitor-mediated activation (2copies)
HrMADS12	Box 4	ATTAAT	6	+	Petroselinum crispum	part of a conserved DNA module involved in light responsiveness
HrMADS12	Box 4	ATTAAT	6	-	Petroselinum crispum	part of a conserved DNA module involved in light responsiveness
HrMADS12	Box 4	ATTAAT	6	-	Petroselinum crispum	part of a conserved DNA module involved in light responsiveness
HrMADS12	CGTCA-motif	CGTCA	5	+	Hordeum vulgare	cis-acting regulatory element involved in the MeJA-responsiveness
HrMADS12	circadian	CAAAGATATC	9	-	Lycopersicon esculentum	cis-acting regulatory element involved in circadian control
HrMADS12	GATA-motif	AAGGATAAGG	9	-	Solanum tuberosum	part of a light responsive element
HrMADS12	GATA-motif	GATAGGG	7	-	Pisum sativum	part of a light responsive element
HrMADS12	GATA-motif	GATAGGG	7	+	Pisum sativum	part of a light responsive element
HrMADS12	G-box	CACGAC	6	-	Zea mays	cis-acting regulatory element involved in light responsiveness
HrMADS12	G-Box	CACGTT	6	+	Pisum sativum	cis-acting regulatory element involved in light responsiveness
HrMADS12	GCN4_motif	TGAGTCA	7	-	Oryza sativa	cis-regulatory element involved in endosperm expression
HrMADS12	GT1-motif	GGTTAA	6	-	Arabidopsis thaliana	light responsive element
HrMADS12	GT1-motif	GGTTAA	6	-	Arabidopsis thaliana	light responsive element
HrMADS12	I-box	AAGATAAGGCT	10	-	Gossypium hirsutum	part of a light responsive element
HrMADS12	I-box	AGATAAGG	8	-	Triticum aestivum	part of a light responsive element
HrMADS12	I-box	atGATAAGGTC	11	+	Helianthus annuus	part of a light responsive element
HrMADS12	I-box	TGATAATGT	9	-	Solanum tuberosum	part of a light responsive element
HrMADS12	MBS	CAACTG	6	-	Arabidopsis thaliana	MYB binding site involved in drought-inducibility
HrMADS12	MRE	AACCTAA	7	+	Petroselinum crispum	MYB binding site involved in light responsiveness
HrMADS12	MRE	AACCTAA	7	-	Petroselinum crispum	MYB binding site involved in light responsiveness
HrMADS12	P-box	CCTTTTG	7	+	Oryza sativa	gibberellin-responsive element
HrMADS12	TATC-box	TATCCCA	7	-	Oryza sativa	cis-acting element involved in gibberellin-responsiveness
HrMADS12	TCA-element	CCATCTTTTT	9	+	Nicotiana tabacum	cis-acting element involved in salicylic acid responsiveness
HrMADS12	TCCC-motif	TCTCCCT	7	-	Spinacia oleracea	part of a light responsive element
HrMADS12	TGACG-motif	TGACG	5	-	Hordeum vulgare	cis-acting regulatory element involved in the MeJA-responsiveness
HrMADS13	ACE	CTAACGTATT	9	+	Petroselinum crispum	cis-acting element involved in light responsiveness
HrMADS13	AE-box	AGAAACAA	8	-	Arabidopsis thaliana	part of a module for light response
HrMADS13	ARE	AAACCA	6	+	Zea mays	cis-acting regulatory element essential for the anaerobic induction
HrMADS13	ARE	AAACCA	6	-	Zea mays	cis-acting regulatory element essential for the anaerobic induction
HrMADS13	AuxRE	TGTCTCAATAAG	11	-	Glycine max	part of an auxin-responsive element
HrMADS13	Box 4	ATTAAT	6	+	Petroselinum crispum	part of a conserved DNA module involved in light responsiveness
HrMADS13	Box 4	ATTAAT	6	-	Petroselinum crispum	part of a conserved DNA module involved in light responsiveness
HrMADS13	Box 4	ATTAAT	6	-	Petroselinum crispum	part of a conserved DNA module involved in light responsiveness
HrMADS13	CAT-box	GCCACT	6	+	Arabidopsis thaliana	cis-acting regulatory element related to meristem expression
HrMADS13	CGTCA-motif	CGTCA	5	-	Hordeum vulgare	cis-acting regulatory element involved in the MeJA-responsiveness
HrMADS13	CGTCA-motif	CGTCA	5	-	Hordeum vulgare	cis-acting regulatory element involved in the MeJA-responsiveness
HrMADS13	GA-motif	ATAGATAA	8	+	Arabidopsis thaliana	part of a light responsive element
HrMADS13	GA-motif	ATAGATAA	8	+	Arabidopsis thaliana	part of a light responsive element
HrMADS13	GA-motif	ATAGATAA	8	+	Arabidopsis thaliana	part of a light responsive element
HrMADS13	GA-motif	ATAGATAA	8	+	Arabidopsis thaliana	part of a light responsive element
HrMADS13	MRE	AACCTAA	7	-	Petroselinum crispum	MYB binding site involved in light responsiveness
HrMADS13	MRE	AACCTAA	7	+	Petroselinum crispum	MYB binding site involved in light responsiveness
HrMADS13	TCA-element	CCATCTTTTT	9	+	Nicotiana tabacum	cis-acting element involved in salicylic acid responsiveness
HrMADS13	TC-rich repeats	GTTTTCTTAC	9	+	Nicotiana tabacum	cis-acting element involved in defense and stress responsiveness
HrMADS13	TGACG-motif	TGACG	5	+	Hordeum vulgare	cis-acting regulatory element involved in the MeJA-responsiveness
HrMADS13	TGACG-motif	TGACG	5	+	Hordeum vulgare	cis-acting regulatory element involved in the MeJA-responsiveness
HrMADS14	ABRE	ACGTG	5	+	Arabidopsis thaliana	cis-acting element involved in the abscisic acid responsiveness
HrMADS14	ABRE	ACGTG	5	+	Arabidopsis thaliana	cis-acting element involved in the abscisic acid responsiveness
HrMADS14	AE-box	AGAAACTT	8	-	Arabidopsis thaliana	part of a module for light response
HrMADS14	ARE	AAACCA	6	-	Zea mays	cis-acting regulatory element essential for the anaerobic induction
HrMADS14	ARE	AAACCA	6	+	Zea mays	cis-acting regulatory element essential for the anaerobic induction
HrMADS14	AT1-motif	AATTATTTTTTATT	13	+	Solanum tuberosum	part of a light responsive module
HrMADS14	Box 4	ATTAAT	6	+	Petroselinum crispum	part of a conserved DNA module involved in light responsiveness
HrMADS14	Box 4	ATTAAT	6	+	Petroselinum crispum	part of a conserved DNA module involved in light responsiveness
HrMADS14	Box 4	ATTAAT	6	+	Petroselinum crispum	part of a conserved DNA module involved in light responsiveness
HrMADS14	Box 4	ATTAAT	6	+	Petroselinum crispum	part of a conserved DNA module involved in light responsiveness
HrMADS14	Box 4	ATTAAT	6	+	Petroselinum crispum	part of a conserved DNA module involved in light responsiveness
HrMADS14	Box 4	ATTAAT	6	+	Petroselinum crispum	part of a conserved DNA module involved in light responsiveness
HrMADS14	Box 4	ATTAAT	6	-	Petroselinum crispum	part of a conserved DNA module involved in light responsiveness
HrMADS14	Box 4	ATTAAT	6	-	Petroselinum crispum	part of a conserved DNA module involved in light responsiveness
HrMADS14	Box 4	ATTAAT	6	-	Petroselinum crispum	part of a conserved DNA module involved in light responsiveness
HrMADS14	Box 4	ATTAAT	6	-	Petroselinum crispum	part of a conserved DNA module involved in light responsiveness
HrMADS14	Box 4	ATTAAT	6	-	Petroselinum crispum	part of a conserved DNA module involved in light responsiveness
HrMADS14	Box 4	ATTAAT	6	-	Petroselinum crispum	part of a conserved DNA module involved in light responsiveness
HrMADS14	CGTCA-motif	CGTCA	5	+	Hordeum vulgare	cis-acting regulatory element involved in the MeJA-responsiveness
HrMADS14	chs-CMA1a	TTACTTAA	8	+	Daucus carota	part of a light responsive element
HrMADS14	GA-motif	ATAGATAA	8	+	Arabidopsis thaliana	part of a light responsive element
HrMADS14	GA-motif	ATAGATAA	8	-	Arabidopsis thaliana	part of a light responsive element
HrMADS14	GATA-motif	GATAGGG	7	-	Pisum sativum	part of a light responsive element
HrMADS14	G-box	TACGTG	6	+	Arabidopsis thaliana	cis-acting regulatory element involved in light responsiveness
HrMADS14	G-Box	CACGTT	6	-	Pisum sativum	cis-acting regulatory element involved in light responsiveness
HrMADS14	HD-Zip 3	GTAAT(G/C)ATTAC	9.5	+	Arabidopsis thaliana	protein binding site
HrMADS14	MBS	CAACTG	6	+	Arabidopsis thaliana	MYB binding site involved in drought-inducibility
HrMADS14	P-box	CCTTTTG	7	-	Oryza sativa	gibberellin-responsive element
HrMADS14	TCT-motif	TCTTAC	6	-	Arabidopsis thaliana	part of a light responsive element
HrMADS14	TGACG-motif	TGACG	5	-	Hordeum vulgare	cis-acting regulatory element involved in the MeJA-responsiveness
HrMADS15	ABRE	ACGTG	5	-	Arabidopsis thaliana	cis-acting element involved in the abscisic acid responsiveness
HrMADS15	ARE	AAACCA	6	-	Zea mays	cis-acting regulatory element essential for the anaerobic induction
HrMADS15	Box 4	ATTAAT	6	+	Petroselinum crispum	part of a conserved DNA module involved in light responsiveness
HrMADS15	Box 4	ATTAAT	6	+	Petroselinum crispum	part of a conserved DNA module involved in light responsiveness
HrMADS15	Box 4	ATTAAT	6	+	Petroselinum crispum	part of a conserved DNA module involved in light responsiveness
HrMADS15	Box 4	ATTAAT	6	+	Petroselinum crispum	part of a conserved DNA module involved in light responsiveness
HrMADS15	Box 4	ATTAAT	6	+	Petroselinum crispum	part of a conserved DNA module involved in light responsiveness
HrMADS15	chs-CMA1a	TTACTTAA	8	+	Daucus carota	part of a light responsive element
HrMADS15	circadian	CAAAGATATC	9	+	Lycopersicon esculentum	cis-acting regulatory element involved in circadian control
HrMADS15	G-Box	CACGTT	6	+	Pisum sativum	cis-acting regulatory element involved in light responsiveness
HrMADS15	GT1-motif	GGTTAA	6	-	Arabidopsis thaliana	light responsive element
HrMADS15	GT1-motif	GGTTAAT	7	+	Avena sativa	light responsive element
HrMADS15	I-box	AGATAAGG	8	+	Triticum aestivum	part of a light responsive element
HrMADS15	MRE	AACCTAA	7	+	Petroselinum crispum	MYB binding site involved in light responsiveness
HrMADS15	MRE	AACCTAA	7	-	Petroselinum crispum	MYB binding site involved in light responsiveness
HrMADS15	MRE	AACCTAA	7	-	Petroselinum crispum	MYB binding site involved in light responsiveness
HrMADS15	TC-rich repeats	GTTTTCTTAC	9	-	Nicotiana tabacum	cis-acting element involved in defense and stress responsiveness
HrMADS15	TC-rich repeats	GTTTTCTTAC	9	-	Nicotiana tabacum	cis-acting element involved in defense and stress responsiveness
HrMADS15	TC-rich repeats	ATTCTCTAAC	9	+	Nicotiana tabacum	cis-acting element involved in defense and stress responsiveness
HrMADS15	TCT-motif	TCTTAC	6	-	Arabidopsis thaliana	part of a light responsive element
HrMADS15	TCT-motif	TCTTAC	6	-	Arabidopsis thaliana	part of a light responsive element
HrMADS15	TCT-motif	TCTTAC	6	+	Arabidopsis thaliana	part of a light responsive element
HrMADS15	TCT-motif	TCTTAC	6	-	Arabidopsis thaliana	part of a light responsive element
HrMADS16	ABRE	ACGTG	5	-	Arabidopsis thaliana	cis-acting element involved in the abscisic acid responsiveness
HrMADS16	ABRE	ACGTG	5	+	Arabidopsis thaliana	cis-acting element involved in the abscisic acid responsiveness
HrMADS16	ARE	AAACCA	6	-	Zea mays	cis-acting regulatory element essential for the anaerobic induction
HrMADS16	AT-rich element	ATAGAAATCAA	11	-	Glycine max	binding site of AT-rich DNA binding protein (ATBP-1)
HrMADS16	AT-rich element	ATAGAAATCAA	10	+	Glycine max	binding site of AT-rich DNA binding protein (ATBP-1)
HrMADS16	Box 4	ATTAAT	6	+	Petroselinum crispum	part of a conserved DNA module involved in light responsiveness
HrMADS16	Box 4	ATTAAT	6	+	Petroselinum crispum	part of a conserved DNA module involved in light responsiveness
HrMADS16	Box 4	ATTAAT	6	+	Petroselinum crispum	part of a conserved DNA module involved in light responsiveness
HrMADS16	Box 4	ATTAAT	6	-	Petroselinum crispum	part of a conserved DNA module involved in light responsiveness
HrMADS16	chs-CMA1a	TTACTTAA	8	+	Daucus carota	part of a light responsive element
HrMADS16	chs-CMA1a	TTACTTAA	8	+	Daucus carota	part of a light responsive element
HrMADS16	circadian	CAAAGATATC	9	+	Lycopersicon esculentum	cis-acting regulatory element involved in circadian control
HrMADS16	G-box	TAAACGTG	8	+	Brassica oleracea	cis-acting regulatory element involved in light responsiveness
HrMADS16	G-Box	CACGTT	6	+	Pisum sativum	cis-acting regulatory element involved in light responsiveness
HrMADS16	G-Box	CACGTT	6	-	Pisum sativum	cis-acting regulatory element involved in light responsiveness
HrMADS16	I-box	AGATAAGG	8	+	Triticum aestivum	part of a light responsive element
HrMADS16	MRE	AACCTAA	7	+	Petroselinum crispum	MYB binding site involved in light responsiveness
HrMADS16	MRE	AACCTAA	7	-	Petroselinum crispum	MYB binding site involved in light responsiveness
HrMADS16	TATC-box	TATCCCA	7	-	Oryza sativa	cis-acting element involved in gibberellin-responsiveness
HrMADS16	TC-rich repeats	GTTTTCTTAC	9	-	Nicotiana tabacum	cis-acting element involved in defense and stress responsiveness
HrMADS16	TCT-motif	TCTTAC	6	-	Arabidopsis thaliana	part of a light responsive element
HrMADS16	TCT-motif	TCTTAC	6	-	Arabidopsis thaliana	part of a light responsive element
HrMADS17	ABRE	ACGTG	5	+	Arabidopsis thaliana	cis-acting element involved in the abscisic acid responsiveness
HrMADS17	AE-box	AGAAACAA	8	+	Arabidopsis thaliana	part of a module for light response
HrMADS17	AE-box	AGAAACAA	8	-	Arabidopsis thaliana	part of a module for light response
HrMADS17	AE-box	AGAAACAA	8	+	Arabidopsis thaliana	part of a module for light response
HrMADS17	ARE	AAACCA	6	+	Zea mays	cis-acting regulatory element essential for the anaerobic induction
HrMADS17	ARE	AAACCA	6	+	Zea mays	cis-acting regulatory element essential for the anaerobic induction
HrMADS17	Box 4	ATTAAT	6	+	Petroselinum crispum	part of a conserved DNA module involved in light responsiveness
HrMADS17	CAT-box	GCCACT	6	+	Arabidopsis thaliana	cis-acting regulatory element related to meristem expression
HrMADS17	circadian	CAAAGATATC	9	+	Lycopersicon esculentum	cis-acting regulatory element involved in circadian control
HrMADS17	G-box	TACGTG	6	+	Arabidopsis thaliana	cis-acting regulatory element involved in light responsiveness
HrMADS17	I-box	GTATAAGGCC	9	+	Larix laricina	part of a light responsive element
HrMADS17	P-box	CCTTTTG	7	+	Oryza sativa	gibberellin-responsive element
HrMADS17	P-box	CCTTTTG	7	+	Oryza sativa	gibberellin-responsive element
HrMADS17	RY-element	CATGCATG	8	+	Helianthus annuus	cis-acting regulatory element involved in seed-specific regulation
HrMADS17	TCA-element	CCATCTTTTT	9	+	Nicotiana tabacum	cis-acting element involved in salicylic acid responsiveness
HrMADS17	TC-rich repeats	GTTTTCTTAC	9	-	Nicotiana tabacum	cis-acting element involved in defense and stress responsiveness
HrMADS17	TCT-motif	TCTTAC	6	-	Arabidopsis thaliana	part of a light responsive element
HrMADS17	TCT-motif	TCTTAC	6	-	Arabidopsis thaliana	part of a light responsive element
HrMADS18	ABRE	ACGTG	5	+	Arabidopsis thaliana	cis-acting element involved in the abscisic acid responsiveness
HrMADS18	AE-box	AGAAACAA	8	+	Arabidopsis thaliana	part of a module for light response
HrMADS18	AE-box	AGAAACAA	8	-	Arabidopsis thaliana	part of a module for light response
HrMADS18	AE-box	AGAAACAA	8	+	Arabidopsis thaliana	part of a module for light response
HrMADS18	ARE	AAACCA	6	+	Zea mays	cis-acting regulatory element essential for the anaerobic induction
HrMADS18	ARE	AAACCA	6	+	Zea mays	cis-acting regulatory element essential for the anaerobic induction
HrMADS18	Box 4	ATTAAT	6	+	Petroselinum crispum	part of a conserved DNA module involved in light responsiveness
HrMADS18	CAT-box	GCCACT	6	+	Arabidopsis thaliana	cis-acting regulatory element related to meristem expression
HrMADS18	circadian	CAAAGATATC	9	+	Lycopersicon esculentum	cis-acting regulatory element involved in circadian control
HrMADS18	G-box	TACGTG	6	+	Arabidopsis thaliana	cis-acting regulatory element involved in light responsiveness
HrMADS18	I-box	GTATAAGGCC	9	+	Larix laricina	part of a light responsive element
HrMADS18	P-box	CCTTTTG	7	+	Oryza sativa	gibberellin-responsive element
HrMADS18	P-box	CCTTTTG	7	+	Oryza sativa	gibberellin-responsive element
HrMADS18	RY-element	CATGCATG	8	+	Helianthus annuus	cis-acting regulatory element involved in seed-specific regulation
HrMADS18	TCA-element	CCATCTTTTT	9	+	Nicotiana tabacum	cis-acting element involved in salicylic acid responsiveness
HrMADS18	TC-rich repeats	GTTTTCTTAC	9	-	Nicotiana tabacum	cis-acting element involved in defense and stress responsiveness
HrMADS18	TCT-motif	TCTTAC	6	-	Arabidopsis thaliana	part of a light responsive element
HrMADS18	TCT-motif	TCTTAC	6	-	Arabidopsis thaliana	part of a light responsive element
HrMADS19	AE-box	AGAAACAA	8	-	Arabidopsis thaliana	part of a module for light response
HrMADS19	AE-box	AGAAACAA	8	-	Arabidopsis thaliana	part of a module for light response
HrMADS19	ARE	AAACCA	6	+	Zea mays	cis-acting regulatory element essential for the anaerobic induction
HrMADS19	ARE	AAACCA	6	+	Zea mays	cis-acting regulatory element essential for the anaerobic induction
HrMADS19	ARE	AAACCA	6	-	Zea mays	cis-acting regulatory element essential for the anaerobic induction
HrMADS19	ARE	AAACCA	6	-	Zea mays	cis-acting regulatory element essential for the anaerobic induction
HrMADS19	ATCT-motif	AATCTAATCC	9	-	Pisum sativum	part of a conserved DNA module involved in light responsiveness
HrMADS19	AT-rich sequence	TAAAATACT	9	+	Pisum sativum	element for maximal elicitor-mediated activation (2copies)
HrMADS19	Box 4	ATTAAT	6	+	Petroselinum crispum	part of a conserved DNA module involved in light responsiveness
HrMADS19	Box 4	ATTAAT	6	+	Petroselinum crispum	part of a conserved DNA module involved in light responsiveness
HrMADS19	Box 4	ATTAAT	6	-	Petroselinum crispum	part of a conserved DNA module involved in light responsiveness
HrMADS19	Box 4	ATTAAT	6	-	Petroselinum crispum	part of a conserved DNA module involved in light responsiveness
HrMADS19	Box 4	ATTAAT	6	-	Petroselinum crispum	part of a conserved DNA module involved in light responsiveness
HrMADS19	Box 4	ATTAAT	6	-	Petroselinum crispum	part of a conserved DNA module involved in light responsiveness
HrMADS19	CAT-box	GCCACT	6	+	Arabidopsis thaliana	cis-acting regulatory element related to meristem expression
HrMADS19	CGTCA-motif	CGTCA	5	+	Hordeum vulgare	cis-acting regulatory element involved in the MeJA-responsiveness
HrMADS19	CGTCA-motif	CGTCA	5	+	Hordeum vulgare	cis-acting regulatory element involved in the MeJA-responsiveness
HrMADS19	GA-motif	ATAGATAA	8	+	Arabidopsis thaliana	part of a light responsive element
HrMADS19	GA-motif	ATAGATAA	8	+	Arabidopsis thaliana	part of a light responsive element
HrMADS19	GATA-motif	GATAGGA	7	-	Arabidopsis thaliana	part of a light responsive element
HrMADS19	GT1-motif	GGTTAA	6	+	Arabidopsis thaliana	light responsive element
HrMADS19	GT1-motif	GGTTAA	6	+	Arabidopsis thaliana	light responsive element
HrMADS19	GT1-motif	GGTTAA	6	-	Arabidopsis thaliana	light responsive element
HrMADS19	MRE	AACCTAA	7	+	Petroselinum crispum	MYB binding site involved in light responsiveness
HrMADS19	TCCC-motif	TCTCCCT	7	+	Spinacia oleracea	part of a light responsive element
HrMADS19	TC-rich repeats	ATTCTCTAAC	9	+	Nicotiana tabacum	cis-acting element involved in defense and stress responsiveness
HrMADS19	TC-rich repeats	GTTTTCTTAC	9	+	Nicotiana tabacum	cis-acting element involved in defense and stress responsiveness
HrMADS19	TGACG-motif	TGACG	5	-	Hordeum vulgare	cis-acting regulatory element involved in the MeJA-responsiveness
HrMADS19	TGACG-motif	TGACG	5	-	Hordeum vulgare	cis-acting regulatory element involved in the MeJA-responsiveness
HrMADS2	AAAC-motif	CAATCAAAACCT	11	-	Spinacia oleracea	light responsive element
HrMADS2	ACE	GACACGTATG	9	-	Petroselinum crispum	cis-acting element involved in light responsiveness
HrMADS2	AE-box	AGAAACAA	8	+	Arabidopsis thaliana	part of a module for light response
HrMADS2	ARE	AAACCA	6	-	Zea mays	cis-acting regulatory element essential for the anaerobic induction
HrMADS2	ARE	AAACCA	6	-	Zea mays	cis-acting regulatory element essential for the anaerobic induction
HrMADS2	Box 4	ATTAAT	6	-	Petroselinum crispum	part of a conserved DNA module involved in light responsiveness
HrMADS2	Box 4	ATTAAT	6	-	Petroselinum crispum	part of a conserved DNA module involved in light responsiveness
HrMADS2	Box 4	ATTAAT	6	-	Petroselinum crispum	part of a conserved DNA module involved in light responsiveness
HrMADS2	CCAAT-box	CAACGG	6	-	Hordeum vulgare	MYBHv1 binding site
HrMADS2	CGTCA-motif	CGTCA	5	+	Hordeum vulgare	cis-acting regulatory element involved in the MeJA-responsiveness
HrMADS2	GA-motif	ATAGATAA	8	-	Arabidopsis thaliana	part of a light responsive element
HrMADS2	GARE-motif	TCTGTTG	7	+	Brassica oleracea	gibberellin-responsive element
HrMADS2	MBS	CAACTG	6	+	Arabidopsis thaliana	MYB binding site involved in drought-inducibility
HrMADS2	O2-site	GATGACATGG	9	-	Zea mays	cis-acting regulatory element involved in zein metabolism regulation
HrMADS2	P-box	CCTTTTG	7	-	Oryza sativa	gibberellin-responsive element
HrMADS2	TATC-box	TATCCCA	7	+	Oryza sativa	cis-acting element involved in gibberellin-responsiveness
HrMADS2	TGACG-motif	TGACG	5	-	Hordeum vulgare	cis-acting regulatory element involved in the MeJA-responsiveness
HrMADS20	ABRE	CACGTG	6	+	Arabidopsis thaliana	cis-acting element involved in the abscisic acid responsiveness
HrMADS20	ABRE	ACGTG	5	+	Arabidopsis thaliana	cis-acting element involved in the abscisic acid responsiveness
HrMADS20	ABRE	ACGTG	5	-	Arabidopsis thaliana	cis-acting element involved in the abscisic acid responsiveness
HrMADS20	ARE	AAACCA	6	+	Zea mays	cis-acting regulatory element essential for the anaerobic induction
HrMADS20	Box 4	ATTAAT	6	+	Petroselinum crispum	part of a conserved DNA module involved in light responsiveness
HrMADS20	Box 4	ATTAAT	6	+	Petroselinum crispum	part of a conserved DNA module involved in light responsiveness
HrMADS20	Box 4	ATTAAT	6	-	Petroselinum crispum	part of a conserved DNA module involved in light responsiveness
HrMADS20	Box 4	ATTAAT	6	-	Petroselinum crispum	part of a conserved DNA module involved in light responsiveness
HrMADS20	chs-CMA2a	TCACTTGA	8	+	Petroselinum crispum	part of a light responsive element
HrMADS20	GATA-motif	AAGATAAGATT	10	-	Arabidopsis thaliana	part of a light responsive element
HrMADS20	G-Box	CACGTG	6	+	Pisum sativum	cis-acting regulatory element involved in light responsiveness
HrMADS20	G-box	CACGTG	6	+	Arabidopsis thaliana	cis-acting regulatory element involved in light responsiveness
HrMADS20	G-box	TACGTG	6	-	Arabidopsis thaliana	cis-acting regulatory element involved in light responsiveness
HrMADS20	GT1-motif	GGTTAAT	7	+	Avena sativa	light responsive element
HrMADS20	TCCC-motif	TCTCCCT	7	-	Spinacia oleracea	part of a light responsive element
HrMADS20	TCCC-motif	TCTCCCT	7	-	Spinacia oleracea	part of a light responsive element
HrMADS20	TC-rich repeats	ATTCTCTAAC	9	-	Nicotiana tabacum	cis-acting element involved in defense and stress responsiveness
HrMADS20	TC-rich repeats	ATTCTCTAAC	9	-	Nicotiana tabacum	cis-acting element involved in defense and stress responsiveness
HrMADS20	TCT-motif	TCTTAC	6	-	Arabidopsis thaliana	part of a light responsive element
HrMADS21	ARE	AAACCA	6	-	Zea mays	cis-acting regulatory element essential for the anaerobic induction
HrMADS21	Box 4	ATTAAT	6	+	Petroselinum crispum	part of a conserved DNA module involved in light responsiveness
HrMADS21	Box 4	ATTAAT	6	+	Petroselinum crispum	part of a conserved DNA module involved in light responsiveness
HrMADS21	Box 4	ATTAAT	6	+	Petroselinum crispum	part of a conserved DNA module involved in light responsiveness
HrMADS21	Box 4	ATTAAT	6	+	Petroselinum crispum	part of a conserved DNA module involved in light responsiveness
HrMADS21	Box 4	ATTAAT	6	+	Petroselinum crispum	part of a conserved DNA module involved in light responsiveness
HrMADS21	Box 4	ATTAAT	6	+	Petroselinum crispum	part of a conserved DNA module involved in light responsiveness
HrMADS21	Box 4	ATTAAT	6	+	Petroselinum crispum	part of a conserved DNA module involved in light responsiveness
HrMADS21	Box II	TGGTAATAA	9	+	Solanum tuberosum	part of a light responsive element
HrMADS21	CGTCA-motif	CGTCA	5	+	Hordeum vulgare	cis-acting regulatory element involved in the MeJA-responsiveness
HrMADS21	GA-motif	ATAGATAA	8	+	Arabidopsis thaliana	part of a light responsive element
HrMADS21	GATA-motif	AAGGATAAGG	9	-	Solanum tuberosum	part of a light responsive element
HrMADS21	GT1-motif	GGTTAA	6	-	Arabidopsis thaliana	light responsive element
HrMADS21	LTR	CCGAAA	6	+	Hordeum vulgare	cis-acting element involved in low-temperature responsiveness
HrMADS21	LTR	CCGAAA	6	-	Hordeum vulgare	cis-acting element involved in low-temperature responsiveness
HrMADS21	MBSI	TTTTTACGGTTA	11	-	Petunia hybrida	MYB binding site involved in flavonoid biosynthetic genes regulation
HrMADS21	P-box	CCTTTTG	7	-	Oryza sativa	gibberellin-responsive element
HrMADS21	TCA-element	CCATCTTTTT	9	-	Nicotiana tabacum	cis-acting element involved in salicylic acid responsiveness
HrMADS21	TCA-element	CCATCTTTTT	9	+	Nicotiana tabacum	cis-acting element involved in salicylic acid responsiveness
HrMADS21	TCA-element	TCAGAAGAGG	9	-	Brassica oleracea	cis-acting element involved in salicylic acid responsiveness
HrMADS21	TCCC-motif	TCTCCCT	7	+	Spinacia oleracea	part of a light responsive element
HrMADS21	TGACG-motif	TGACG	5	-	Hordeum vulgare	cis-acting regulatory element involved in the MeJA-responsiveness
HrMADS22	AE-box	AGAAACAA	8	+	Arabidopsis thaliana	part of a module for light response
HrMADS22	AE-box	AGAAACAA	8	+	Arabidopsis thaliana	part of a module for light response
HrMADS22	ARE	AAACCA	6	-	Zea mays	cis-acting regulatory element essential for the anaerobic induction
HrMADS22	CGTCA-motif	CGTCA	5	-	Hordeum vulgare	cis-acting regulatory element involved in the MeJA-responsiveness
HrMADS22	Gap-box	CAAATGAA(A/G)A	9	-	Arabidopsis thaliana	part of a light responsive element
HrMADS22	GARE-motif	TCTGTTG	7	-	Brassica oleracea	gibberellin-responsive element
HrMADS22	GT1-motif	GGTTAAT	7	+	Avena sativa	light responsive element
HrMADS22	GT1-motif	GGTTAAT	7	+	Avena sativa	light responsive element
HrMADS22	MRE	AACCTAA	7	-	Petroselinum crispum	MYB binding site involved in light responsiveness
HrMADS22	MRE	AACCTAA	7	+	Petroselinum crispum	MYB binding site involved in light responsiveness
HrMADS22	O2-site	GATGA(C/T)(A/G)TG(A/G)	8	+	Zea mays	cis-acting regulatory element involved in zein metabolism regulation
HrMADS22	P-box	CCTTTTG	7	-	Oryza sativa	gibberellin-responsive element
HrMADS22	TCA-element	CCATCTTTTT	9	-	Nicotiana tabacum	cis-acting element involved in salicylic acid responsiveness
HrMADS22	TC-rich repeats	ATTCTCTAAC	9	+	Nicotiana tabacum	cis-acting element involved in defense and stress responsiveness
HrMADS22	TCT-motif	TCTTAC	6	-	Arabidopsis thaliana	part of a light responsive element
HrMADS22	TGACG-motif	TGACG	5	+	Hordeum vulgare	cis-acting regulatory element involved in the MeJA-responsiveness
HrMADS23	3-AF1 binding site	TAAGAGAGGAA	10	-	Solanum tuberosum	light responsive element
HrMADS23	A-box	CCGTCC	6	+	Petroselinum crispum	cis-acting regulatory element
HrMADS23	ABRE	CACGTG	6	+	Arabidopsis thaliana	cis-acting element involved in the abscisic acid responsiveness
HrMADS23	ABRE	ACGTG	5	+	Arabidopsis thaliana	cis-acting element involved in the abscisic acid responsiveness
HrMADS23	ABRE	TACGGTC	7	+	Arabidopsis thaliana	cis-acting element involved in the abscisic acid responsiveness
HrMADS23	ABRE	ACGTG	5	+	Arabidopsis thaliana	cis-acting element involved in the abscisic acid responsiveness
HrMADS23	AE-box	AGAAACAA	8	-	Arabidopsis thaliana	part of a module for light response
HrMADS23	ARE	AAACCA	6	-	Zea mays	cis-acting regulatory element essential for the anaerobic induction
HrMADS23	ARE	AAACCA	6	-	Zea mays	cis-acting regulatory element essential for the anaerobic induction
HrMADS23	AT1-motif	AATTATTTTTTATT	13	+	Solanum tuberosum	part of a light responsive module
HrMADS23	Box 4	ATTAAT	6	+	Petroselinum crispum	part of a conserved DNA module involved in light responsiveness
HrMADS23	Box 4	ATTAAT	6	+	Petroselinum crispum	part of a conserved DNA module involved in light responsiveness
HrMADS23	Box 4	ATTAAT	6	+	Petroselinum crispum	part of a conserved DNA module involved in light responsiveness
HrMADS23	Box 4	ATTAAT	6	+	Petroselinum crispum	part of a conserved DNA module involved in light responsiveness
HrMADS23	Box 4	ATTAAT	6	-	Petroselinum crispum	part of a conserved DNA module involved in light responsiveness
HrMADS23	Box 4	ATTAAT	6	-	Petroselinum crispum	part of a conserved DNA module involved in light responsiveness
HrMADS23	Box 4	ATTAAT	6	-	Petroselinum crispum	part of a conserved DNA module involved in light responsiveness
HrMADS23	Box 4	ATTAAT	6	-	Petroselinum crispum	part of a conserved DNA module involved in light responsiveness
HrMADS23	Box 4	ATTAAT	6	-	Petroselinum crispum	part of a conserved DNA module involved in light responsiveness
HrMADS23	CCAAT-box	CAACGG	6	+	Hordeum vulgare	MYBHv1 binding site
HrMADS23	GATA-motif	AAGATAAGATT	10	+	Arabidopsis thaliana	part of a light responsive element
HrMADS23	G-Box	CACGTG	6	+	Pisum sativum	cis-acting regulatory element involved in light responsiveness
HrMADS23	G-box	CACGTG	6	+	Arabidopsis thaliana	cis-acting regulatory element involved in light responsiveness
HrMADS23	G-box	TACGTG	6	+	Arabidopsis thaliana	cis-acting regulatory element involved in light responsiveness
HrMADS23	GT1-motif	GGTTAA	6	+	Arabidopsis thaliana	light responsive element
HrMADS23	LTR	CCGAAA	6	+	Hordeum vulgare	cis-acting element involved in low-temperature responsiveness
HrMADS23	MRE	AACCTAA	7	-	Petroselinum crispum	MYB binding site involved in light responsiveness
HrMADS23	MRE	AACCTAA	7	-	Petroselinum crispum	MYB binding site involved in light responsiveness
HrMADS23	TCA-element	CCATCTTTTT	9	-	Nicotiana tabacum	cis-acting element involved in salicylic acid responsiveness
HrMADS23	TCA-element	CCATCTTTTT	9	+	Nicotiana tabacum	cis-acting element involved in salicylic acid responsiveness
HrMADS23	TCT-motif	TCTTAC	6	-	Arabidopsis thaliana	part of a light responsive element
HrMADS23	TCT-motif	TCTTAC	6	-	Arabidopsis thaliana	part of a light responsive element
HrMADS23	WUN-motif	AAATTTCCT	9	+	Brassica oleracea	wound-responsive element
HrMADS24	ABRE	ACGTG	5	+	Arabidopsis thaliana	cis-acting element involved in the abscisic acid responsiveness
HrMADS24	ARE	AAACCA	6	-	Zea mays	cis-acting regulatory element essential for the anaerobic induction
HrMADS24	ARE	AAACCA	6	-	Zea mays	cis-acting regulatory element essential for the anaerobic induction
HrMADS24	ARE	AAACCA	6	-	Zea mays	cis-acting regulatory element essential for the anaerobic induction
HrMADS24	ARE	AAACCA	6	+	Zea mays	cis-acting regulatory element essential for the anaerobic induction
HrMADS24	ATC-motif	AGTAATCT	8	+	Spinacia oleracea	part of a conserved DNA module involved in light responsiveness
HrMADS24	Box 4	ATTAAT	6	+	Petroselinum crispum	part of a conserved DNA module involved in light responsiveness
HrMADS24	Box 4	ATTAAT	6	-	Petroselinum crispum	part of a conserved DNA module involved in light responsiveness
HrMADS24	Box 4	ATTAAT	6	-	Petroselinum crispum	part of a conserved DNA module involved in light responsiveness
HrMADS24	CCAAT-box	CAACGG	6	-	Hordeum vulgare	MYBHv1 binding site
HrMADS24	CGTCA-motif	CGTCA	5	+	Hordeum vulgare	cis-acting regulatory element involved in the MeJA-responsiveness
HrMADS24	GA-motif	ATAGATAA	8	+	Arabidopsis thaliana	part of a light responsive element
HrMADS24	Gap-box	CAAATGAA(A/G)A	9.5	-	Arabidopsis thaliana	part of a light responsive element
HrMADS24	GATA-motif	GATAGGA	7	-	Arabidopsis thaliana	part of a light responsive element
HrMADS24	G-box	CACGTC	6	-	Zea mays	cis-acting regulatory element involved in light responsiveness
HrMADS24	LTR	CCGAAA	6	+	Hordeum vulgare	cis-acting element involved in low-temperature responsiveness
HrMADS24	MBS	CAACTG	6	-	Arabidopsis thaliana	MYB binding site involved in drought-inducibility
HrMADS24	TCA-element	TCAGAAGAGG	9	+	Brassica oleracea	cis-acting element involved in salicylic acid responsiveness
HrMADS24	TGACG-motif	TGACG	5	-	Hordeum vulgare	cis-acting regulatory element involved in the MeJA-responsiveness
HrMADS25	ABRE	ACGTG	5	+	Arabidopsis thaliana	cis-acting element involved in the abscisic acid responsiveness
HrMADS25	ABRE	ACGTG	5	+	Arabidopsis thaliana	cis-acting element involved in the abscisic acid responsiveness
HrMADS25	ABRE	ACGTG	5	+	Arabidopsis thaliana	cis-acting element involved in the abscisic acid responsiveness
HrMADS25	ABRE	ACGTG	5	-	Arabidopsis thaliana	cis-acting element involved in the abscisic acid responsiveness
HrMADS25	ARE	AAACCA	6	-	Zea mays	cis-acting regulatory element essential for the anaerobic induction
HrMADS25	ARE	AAACCA	6	-	Zea mays	cis-acting regulatory element essential for the anaerobic induction
HrMADS25	ARE	AAACCA	6	+	Zea mays	cis-acting regulatory element essential for the anaerobic induction
HrMADS25	ARE	AAACCA	6	+	Zea mays	cis-acting regulatory element essential for the anaerobic induction
HrMADS25	ARE	AAACCA	6	-	Zea mays	cis-acting regulatory element essential for the anaerobic induction
HrMADS25	ARE	AAACCA	6	-	Zea mays	cis-acting regulatory element essential for the anaerobic induction
HrMADS25	AT-rich element	ATAGAAATCAA	10	+	Glycine max	binding site of AT-rich DNA binding protein (ATBP-1)
HrMADS25	Box 4	ATTAAT	6	+	Petroselinum crispum	part of a conserved DNA module involved in light responsiveness
HrMADS25	Box 4	ATTAAT	6	+	Petroselinum crispum	part of a conserved DNA module involved in light responsiveness
HrMADS25	Box 4	ATTAAT	6	+	Petroselinum crispum	part of a conserved DNA module involved in light responsiveness
HrMADS25	Box 4	ATTAAT	6	+	Petroselinum crispum	part of a conserved DNA module involved in light responsiveness
HrMADS25	Box 4	ATTAAT	6	+	Petroselinum crispum	part of a conserved DNA module involved in light responsiveness
HrMADS25	Box 4	ATTAAT	6	+	Petroselinum crispum	part of a conserved DNA module involved in light responsiveness
HrMADS25	Box 4	ATTAAT	6	-	Petroselinum crispum	part of a conserved DNA module involved in light responsiveness
HrMADS25	Box 4	ATTAAT	6	-	Petroselinum crispum	part of a conserved DNA module involved in light responsiveness
HrMADS25	Box 4	ATTAAT	6	-	Petroselinum crispum	part of a conserved DNA module involved in light responsiveness
HrMADS25	CGTCA-motif	CGTCA	5	+	Hordeum vulgare	cis-acting regulatory element involved in the MeJA-responsiveness
HrMADS25	CGTCA-motif	CGTCA	5	-	Hordeum vulgare	cis-acting regulatory element involved in the MeJA-responsiveness
HrMADS25	G-Box	CACGTT	6	-	Pisum sativum	cis-acting regulatory element involved in light responsiveness
HrMADS25	G-Box	CACGTT	6	-	Pisum sativum	cis-acting regulatory element involved in light responsiveness
HrMADS25	G-box	TAACACGTAG	9	-	Brassica oleracea	cis-acting regulatory element involved in light responsiveness
HrMADS25	G-box	TACGTG	6	+	Arabidopsis thaliana	cis-acting regulatory element involved in light responsiveness
HrMADS25	G-box	CACGTC	6	+	Zea mays	cis-acting regulatory element involved in light responsiveness
HrMADS25	GT1-motif	GGTTAAT	7	-	Avena sativa	light responsive element
HrMADS25	GT1-motif	GGTTAA	6	-	Arabidopsis thaliana	light responsive element
HrMADS25	MBS	CAACTG	6	-	Arabidopsis thaliana	MYB binding site involved in drought-inducibility
HrMADS25	MRE	AACCTAA	7	-	Petroselinum crispum	MYB binding site involved in light responsiveness
HrMADS25	TCT-motif	TCTTAC	6	-	Arabidopsis thaliana	part of a light responsive element
HrMADS25	TGACG-motif	TGACG	5	-	Hordeum vulgare	cis-acting regulatory element involved in the MeJA-responsiveness
HrMADS25	TGACG-motif	TGACG	5	+	Hordeum vulgare	cis-acting regulatory element involved in the MeJA-responsiveness
HrMADS26	ABRE	ACGTG	5	-	Arabidopsis thaliana	cis-acting element involved in the abscisic acid responsiveness
HrMADS26	ABRE	ACGTG	5	-	Arabidopsis thaliana	cis-acting element involved in the abscisic acid responsiveness
HrMADS26	ABRE	GACACGTGGC	9	+	Triticum aestivum	cis-acting element involved in the abscisic acid responsiveness
HrMADS26	ABRE	CACGTG	6	-	Arabidopsis thaliana	cis-acting element involved in the abscisic acid responsiveness
HrMADS26	ABRE	ACGTG	5	+	Arabidopsis thaliana	cis-acting element involved in the abscisic acid responsiveness
HrMADS26	ACA-motif	AATCACAACCATA	12	-	Arabidopsis thaliana	part of gapA in (gapA-CMA1) involved with light responsiveness
HrMADS26	ARE	AAACCA	6	+	Zea mays	cis-acting regulatory element essential for the anaerobic induction
HrMADS26	ARE	AAACCA	6	-	Zea mays	cis-acting regulatory element essential for the anaerobic induction
HrMADS26	AT-rich element	ATAGAAATCAA	10	+	Glycine max	binding site of AT-rich DNA binding protein (ATBP-1)
HrMADS26	Box 4	ATTAAT	6	+	Petroselinum crispum	part of a conserved DNA module involved in light responsiveness
HrMADS26	Box 4	ATTAAT	6	+	Petroselinum crispum	part of a conserved DNA module involved in light responsiveness
HrMADS26	Box 4	ATTAAT	6	+	Petroselinum crispum	part of a conserved DNA module involved in light responsiveness
HrMADS26	Box 4	ATTAAT	6	+	Petroselinum crispum	part of a conserved DNA module involved in light responsiveness
HrMADS26	Box 4	ATTAAT	6	+	Petroselinum crispum	part of a conserved DNA module involved in light responsiveness
HrMADS26	Box 4	ATTAAT	6	-	Petroselinum crispum	part of a conserved DNA module involved in light responsiveness
HrMADS26	Box 4	ATTAAT	6	-	Petroselinum crispum	part of a conserved DNA module involved in light responsiveness
HrMADS26	Box 4	ATTAAT	6	-	Petroselinum crispum	part of a conserved DNA module involved in light responsiveness
HrMADS26	chs-CMA1a	TTACTTAA	8	-	Daucus carota	part of a light responsive element
HrMADS26	circadian	CAAAGATATC	9	-	Lycopersicon esculentum	cis-acting regulatory element involved in circadian control
HrMADS26	G-Box	CACGTT	6	+	Pisum sativum	cis-acting regulatory element involved in light responsiveness
HrMADS26	G-Box	CACGTG	6	-	Pisum sativum	cis-acting regulatory element involved in light responsiveness
HrMADS26	G-box	CACGAC	6	-	Zea mays	cis-acting regulatory element involved in light responsiveness
HrMADS26	G-box	TACGTG	6	-	Arabidopsis thaliana	cis-acting regulatory element involved in light responsiveness
HrMADS26	G-box	CACGTG	6	-	Arabidopsis thaliana	cis-acting regulatory element involved in light responsiveness
HrMADS26	GT1-motif	GGTTAAT	7	+	Avena sativa	light responsive element
HrMADS26	MRE	AACCTAA	7	-	Petroselinum crispum	MYB binding site involved in light responsiveness
HrMADS26	TC-rich repeats	ATTCTCTAAC	9	+	Nicotiana tabacum	cis-acting element involved in defense and stress responsiveness
HrMADS26	TC-rich repeats	GTTTTCTTAC	9	-	Nicotiana tabacum	cis-acting element involved in defense and stress responsiveness
HrMADS26	TCT-motif	TCTTAC	6	-	Arabidopsis thaliana	part of a light responsive element
HrMADS27	3-AF1 binding site	TAAGAGAGGAA	10	-	Solanum tuberosum	light responsive element
HrMADS27	ABRE	ACGTG	5	-	Arabidopsis thaliana	cis-acting element involved in the abscisic acid responsiveness
HrMADS27	ABRE	ACGTG	5	+	Arabidopsis thaliana	cis-acting element involved in the abscisic acid responsiveness
HrMADS27	ARE	AAACCA	6	+	Zea mays	cis-acting regulatory element essential for the anaerobic induction
HrMADS27	ARE	AAACCA	6	-	Zea mays	cis-acting regulatory element essential for the anaerobic induction
HrMADS27	ARE	AAACCA	6	-	Zea mays	cis-acting regulatory element essential for the anaerobic induction
HrMADS27	AT1-motif	AATTATTTTTTATT	13	-	Solanum tuberosum	part of a light responsive module
HrMADS27	Box 4	ATTAAT	6	+	Petroselinum crispum	part of a conserved DNA module involved in light responsiveness
HrMADS27	Box 4	ATTAAT	6	+	Petroselinum crispum	part of a conserved DNA module involved in light responsiveness
HrMADS27	Box 4	ATTAAT	6	+	Petroselinum crispum	part of a conserved DNA module involved in light responsiveness
HrMADS27	Box 4	ATTAAT	6	+	Petroselinum crispum	part of a conserved DNA module involved in light responsiveness
HrMADS27	Box 4	ATTAAT	6	-	Petroselinum crispum	part of a conserved DNA module involved in light responsiveness
HrMADS27	Box 4	ATTAAT	6	-	Petroselinum crispum	part of a conserved DNA module involved in light responsiveness
HrMADS27	Box 4	ATTAAT	6	-	Petroselinum crispum	part of a conserved DNA module involved in light responsiveness
HrMADS27	Box 4	ATTAAT	6	-	Petroselinum crispum	part of a conserved DNA module involved in light responsiveness
HrMADS27	CGTCA-motif	CGTCA	5	+	Hordeum vulgare	cis-acting regulatory element involved in the MeJA-responsiveness
HrMADS27	GA-motif	ATAGATAA	8	+	Arabidopsis thaliana	part of a light responsive element
HrMADS27	G-box	CACGTC	6	+	Zea mays	cis-acting regulatory element involved in light responsiveness
HrMADS27	G-box	TAAACGTG	8	+	Brassica oleracea	cis-acting regulatory element involved in light responsiveness
HrMADS27	G-Box	CACGTT	6	-	Pisum sativum	cis-acting regulatory element involved in light responsiveness
HrMADS27	GC-motif	CCCCCG	6	-	Zea mays	enhancer-like element involved in anoxic specific inducibility
HrMADS27	GT1-motif	GGTTAAT	7	+	Avena sativa	light responsive element
HrMADS27	GT1-motif	GGTTAAT	7	+	Avena sativa	light responsive element
HrMADS27	GT1-motif	GGTTAA	6	+	Arabidopsis thaliana	light responsive element
HrMADS27	TATC-box	TATCCCA	7	+	Oryza sativa	cis-acting element involved in gibberellin-responsiveness
HrMADS27	TC-rich repeats	ATTCTCTAAC	9	+	Nicotiana tabacum	cis-acting element involved in defense and stress responsiveness
HrMADS27	TGACG-motif	TGACG	5	-	Hordeum vulgare	cis-acting regulatory element involved in the MeJA-responsiveness
HrMADS27	WUN-motif	AAATTTCCT	9	+	Brassica oleracea	wound-responsive element
HrMADS28	3-AF1 binding site	TAAGAGAGGAA	10	+	Solanum tuberosum	light responsive element
HrMADS28	ABRE	CACGTG	6	+	Arabidopsis thaliana	cis-acting element involved in the abscisic acid responsiveness
HrMADS28	ABRE	ACGTG	5	+	Arabidopsis thaliana	cis-acting element involved in the abscisic acid responsiveness
HrMADS28	ARE	AAACCA	6	+	Zea mays	cis-acting regulatory element essential for the anaerobic induction
HrMADS28	ARE	AAACCA	6	-	Zea mays	cis-acting regulatory element essential for the anaerobic induction
HrMADS28	ATCT-motif	AATCTAATCC	9	-	Pisum sativum	part of a conserved DNA module involved in light responsiveness
HrMADS28	ATCT-motif	AATCTAATCC	9	+	Pisum sativum	part of a conserved DNA module involved in light responsiveness
HrMADS28	Box 4	ATTAAT	6	+	Petroselinum crispum	part of a conserved DNA module involved in light responsiveness
HrMADS28	Box 4	ATTAAT	6	+	Petroselinum crispum	part of a conserved DNA module involved in light responsiveness
HrMADS28	Box 4	ATTAAT	6	-	Petroselinum crispum	part of a conserved DNA module involved in light responsiveness
HrMADS28	Box 4	ATTAAT	6	-	Petroselinum crispum	part of a conserved DNA module involved in light responsiveness
HrMADS28	CAT-box	GCCACT	6	-	Arabidopsis thaliana	cis-acting regulatory element related to meristem expression
HrMADS28	CGTCA-motif	CGTCA	5	+	Hordeum vulgare	cis-acting regulatory element involved in the MeJA-responsiveness
HrMADS28	chs-CMA1a	TTACTTAA	8	-	Daucus carota	part of a light responsive element
HrMADS28	G-Box	CACGTG	6	+	Pisum sativum	cis-acting regulatory element involved in light responsiveness
HrMADS28	G-box	CACGTG	6	+	Arabidopsis thaliana	cis-acting regulatory element involved in light responsiveness
HrMADS28	GT1-motif	GGTTAA	6	+	Arabidopsis thaliana	light responsive element
HrMADS28	GT1-motif	GGTTAA	6	-	Arabidopsis thaliana	light responsive element
HrMADS28	GT1-motif	GGTTAAT	7	+	Avena sativa	light responsive element
HrMADS28	GT1-motif	GGTTAA	6	+	Arabidopsis thaliana	light responsive element
HrMADS28	MRE	AACCTAA	7	+	Petroselinum crispum	MYB binding site involved in light responsiveness
HrMADS28	MRE	AACCTAA	7	+	Petroselinum crispum	MYB binding site involved in light responsiveness
HrMADS28	MRE	AACCTAA	7	-	Petroselinum crispum	MYB binding site involved in light responsiveness
HrMADS28	MRE	AACCTAA	7	+	Petroselinum crispum	MYB binding site involved in light responsiveness
HrMADS28	TATC-box	TATCCCA	7	+	Oryza sativa	cis-acting element involved in gibberellin-responsiveness
HrMADS28	TC-rich repeats	ATTCTCTAAC	10	+	Nicotiana tabacum	cis-acting element involved in defense and stress responsiveness
HrMADS28	TCT-motif	TCTTAC	6	+	Arabidopsis thaliana	part of a light responsive element
HrMADS28	TGACG-motif	TGACG	5	-	Hordeum vulgare	cis-acting regulatory element involved in the MeJA-responsiveness
HrMADS28	TGA-element	AACGAC	6	+	Brassica oleracea	auxin-responsive element
HrMADS29	ARE	AAACCA	6	+	Zea mays	cis-acting regulatory element essential for the anaerobic induction
HrMADS29	ARE	AAACCA	6	-	Zea mays	cis-acting regulatory element essential for the anaerobic induction
HrMADS29	ARE	AAACCA	6	+	Zea mays	cis-acting regulatory element essential for the anaerobic induction
HrMADS29	Box 4	ATTAAT	6	-	Petroselinum crispum	part of a conserved DNA module involved in light responsiveness
HrMADS29	CAT-box	GCCACT	6	-	Arabidopsis thaliana	cis-acting regulatory element related to meristem expression
HrMADS29	CGTCA-motif	CGTCA	5	-	Hordeum vulgare	cis-acting regulatory element involved in the MeJA-responsiveness
HrMADS29	GCN4_motif	TGAGTCA	7	-	Oryza sativa	cis-regulatory element involved in endosperm expression
HrMADS29	GCN4_motif	TGAGTCA	7	-	Oryza sativa	cis-regulatory element involved in endosperm expression
HrMADS29	LTR	CCGAAA	6	+	Hordeum vulgare	cis-acting element involved in low-temperature responsiveness
HrMADS29	MBS	CAACTG	6	+	Arabidopsis thaliana	MYB binding site involved in drought-inducibility
HrMADS29	MBS	CAACTG	6	-	Arabidopsis thaliana	MYB binding site involved in drought-inducibility
HrMADS29	MRE	AACCTAA	7	+	Petroselinum crispum	MYB binding site involved in light responsiveness
HrMADS29	MRE	AACCTAA	7	-	Petroselinum crispum	MYB binding site involved in light responsiveness
HrMADS29	O2-site	GATGACATGG	9	-	Zea mays	cis-acting regulatory element involved in zein metabolism regulation
HrMADS29	O2-site	GTTGACGTGA	9	+	Zea mays	cis-acting regulatory element involved in zein metabolism regulation
HrMADS29	O2-site	GATGATGTGG	9	+	Zea mays	cis-acting regulatory element involved in zein metabolism regulation
HrMADS29	P-box	CCTTTTG	7	+	Oryza sativa	gibberellin-responsive element
HrMADS29	TCT-motif	TCTTAC	6	-	Arabidopsis thaliana	part of a light responsive element
HrMADS29	TGACG-motif	TGACG	5	+	Hordeum vulgare	cis-acting regulatory element involved in the MeJA-responsiveness
HrMADS3	ABRE	ACGTG	5	+	Arabidopsis thaliana	cis-acting element involved in the abscisic acid responsiveness
HrMADS3	AE-box	AGAAACAA	8	-	Arabidopsis thaliana	part of a module for light response
HrMADS3	ARE	AAACCA	6	-	Zea mays	cis-acting regulatory element essential for the anaerobic induction
HrMADS3	ARE	AAACCA	6	+	Zea mays	cis-acting regulatory element essential for the anaerobic induction
HrMADS3	ARE	AAACCA	6	-	Zea mays	cis-acting regulatory element essential for the anaerobic induction
HrMADS3	ARE	AAACCA	6	+	Zea mays	cis-acting regulatory element essential for the anaerobic induction
HrMADS3	ARE	AAACCA	6	+	Zea mays	cis-acting regulatory element essential for the anaerobic induction
HrMADS3	Box 4	ATTAAT	6	+	Petroselinum crispum	part of a conserved DNA module involved in light responsiveness
HrMADS3	Box 4	ATTAAT	6	-	Petroselinum crispum	part of a conserved DNA module involved in light responsiveness
HrMADS3	CGTCA-motif	CGTCA	5	-	Hordeum vulgare	cis-acting regulatory element involved in the MeJA-responsiveness
HrMADS3	CGTCA-motif	CGTCA	5	+	Hordeum vulgare	cis-acting regulatory element involved in the MeJA-responsiveness
HrMADS3	chs-CMA1a	TTACTTAA	8	-	Daucus carota	part of a light responsive element
HrMADS3	G-box	CACGTC	6	-	Zea mays	cis-acting regulatory element involved in light responsiveness
HrMADS3	GCN4_motif	TGAGTCA	7	-	Oryza sativa	cis-regulatory element involved in endosperm expression
HrMADS3	GT1-motif	GGTTAA	6	-	Arabidopsis thaliana	light responsive element
HrMADS3	MBS	CAACTG	6	-	Arabidopsis thaliana	MYB binding site involved in drought-inducibility
HrMADS3	MRE	AACCTAA	7	+	Petroselinum crispum	MYB binding site involved in light responsiveness
HrMADS3	MRE	AACCTAA	7	-	Petroselinum crispum	MYB binding site involved in light responsiveness
HrMADS3	O2-site	GTTGACGTGA	9	+	Zea mays	cis-acting regulatory element involved in zein metabolism regulation
HrMADS3	P-box	CCTTTTG	7	+	Oryza sativa	gibberellin-responsive element
HrMADS3	TCA-element	CCATCTTTTT	9	+	Nicotiana tabacum	cis-acting element involved in salicylic acid responsiveness
HrMADS3	TCA-element	TCAGAAGAGG	9	-	Brassica oleracea	cis-acting element involved in salicylic acid responsiveness
HrMADS3	TCT-motif	TCTTAC	6	-	Arabidopsis thaliana	part of a light responsive element
HrMADS3	TGACG-motif	TGACG	5	+	Hordeum vulgare	cis-acting regulatory element involved in the MeJA-responsiveness
HrMADS3	TGACG-motif	TGACG	5	-	Hordeum vulgare	cis-acting regulatory element involved in the MeJA-responsiveness
HrMADS3	TGA-element	AACGAC	6	+	Brassica oleracea	auxin-responsive element
HrMADS30	ARE	AAACCA	6	-	Zea mays	cis-acting regulatory element essential for the anaerobic induction
HrMADS30	Box 4	ATTAAT	6	-	Petroselinum crispum	part of a conserved DNA module involved in light responsiveness
HrMADS30	GCN4_motif	TGAGTCA	7	-	Oryza sativa	cis-regulatory element involved in endosperm expression
HrMADS30	GT1-motif	GGTTAA	6	-	Arabidopsis thaliana	light responsive element
HrMADS30	O2-site	GATGATGTGG	9	-	Zea mays	cis-acting regulatory element involved in zein metabolism regulation
HrMADS30	P-box	CCTTTTG	7	-	Oryza sativa	gibberellin-responsive element
HrMADS30	RY-element	CATGCATG	8	+	Helianthus annuus	cis-acting regulatory element involved in seed-specific regulation
HrMADS30	TCA-element	TCAGAAGAGG	9	-	Brassica oleracea	cis-acting element involved in salicylic acid responsiveness
HrMADS30	TC-rich repeats	GTTTTCTTAC	9	+	Nicotiana tabacum	cis-acting element involved in defense and stress responsiveness
HrMADS30	TC-rich repeats	GTTTTCTTAC	9	-	Nicotiana tabacum	cis-acting element involved in defense and stress responsiveness
HrMADS30	TCT-motif	TCTTAC	6	-	Arabidopsis thaliana	part of a light responsive element
HrMADS31	ABRE	ACGTG	5	-	Arabidopsis thaliana	cis-acting element involved in the abscisic acid responsiveness
HrMADS31	ARE	AAACCA	6	+	Zea mays	cis-acting regulatory element essential for the anaerobic induction
HrMADS31	ARE	AAACCA	6	+	Zea mays	cis-acting regulatory element essential for the anaerobic induction
HrMADS31	ATCT-motif	AATCTAATCC	9	-	Pisum sativum	part of a conserved DNA module involved in light responsiveness
HrMADS31	AT-rich element	ATAGAAATCAA	10	+	Glycine max	binding site of AT-rich DNA binding protein (ATBP-1)
HrMADS31	AT-rich element	ATAGAAATCAA	10	-	Glycine max	binding site of AT-rich DNA binding protein (ATBP-1)
HrMADS31	AT-rich sequence	TAAAATACT	9	-	Pisum sativum	element for maximal elicitor-mediated activation (2copies)
HrMADS31	AuxRR-core	GGTCCAT	7	+	Nicotiana tabacum	cis-acting regulatory element involved in auxin responsiveness
HrMADS31	Box 4	ATTAAT	6	+	Petroselinum crispum	part of a conserved DNA module involved in light responsiveness
HrMADS31	Box 4	ATTAAT	6	+	Petroselinum crispum	part of a conserved DNA module involved in light responsiveness
HrMADS31	Box III	atCATTTTCACt	11	-	Pisum sativum	protein binding site
HrMADS31	CGTCA-motif	CGTCA	5	-	Hordeum vulgare	cis-acting regulatory element involved in the MeJA-responsiveness
HrMADS31	chs-CMA2a	TCACTTGA	8	+	Petroselinum crispum	part of a light responsive element
HrMADS31	circadian	CAAAGATATC	9	+	Lycopersicon esculentum	cis-acting regulatory element involved in circadian control
HrMADS31	G-box	TACGTG	6	-	Arabidopsis thaliana	cis-acting regulatory element involved in light responsiveness
HrMADS31	GT1-motif	GGTTAA	6	-	Arabidopsis thaliana	light responsive element
HrMADS31	MBS	CAACTG	6	+	Arabidopsis thaliana	MYB binding site involved in drought-inducibility
HrMADS31	MRE	AACCTAA	7	+	Petroselinum crispum	MYB binding site involved in light responsiveness
HrMADS31	MRE	AACCTAA	7	+	Petroselinum crispum	MYB binding site involved in light responsiveness
HrMADS31	Sp1	GGGCGG	6	+	Oryza sativa	light responsive element
HrMADS31	TCA-element	CCATCTTTTT	9	+	Nicotiana tabacum	cis-acting element involved in salicylic acid responsiveness
HrMADS31	TC-rich repeats	GTTTTCTTAC	9	-	Nicotiana tabacum	cis-acting element involved in defense and stress responsiveness
HrMADS31	TGACG-motif	TGACG	5	+	Hordeum vulgare	cis-acting regulatory element involved in the MeJA-responsiveness
HrMADS31	WUN-motif	AAATTTCCT	9	-	Brassica oleracea	wound-responsive element
HrMADS32	ABRE	ACGTG	5	-	Arabidopsis thaliana	cis-acting element involved in the abscisic acid responsiveness
HrMADS32	AE-box	AGAAACTT	8	-	Arabidopsis thaliana	part of a module for light response
HrMADS32	ARE	AAACCA	6	-	Zea mays	cis-acting regulatory element essential for the anaerobic induction
HrMADS32	AT-rich element	ATAGAAATCAA	10	+	Glycine max	binding site of AT-rich DNA binding protein (ATBP-1)
HrMADS32	Box 4	ATTAAT	6	-	Petroselinum crispum	part of a conserved DNA module involved in light responsiveness
HrMADS32	Box 4	ATTAAT	6	-	Petroselinum crispum	part of a conserved DNA module involved in light responsiveness
HrMADS32	Box 4	ATTAAT	6	-	Petroselinum crispum	part of a conserved DNA module involved in light responsiveness
HrMADS32	GATA-motif	AAGATAAGATT	10	-	Arabidopsis thaliana	part of a light responsive element
HrMADS32	GATA-motif	AAGATAAGATT	10	+	Arabidopsis thaliana	part of a light responsive element
HrMADS32	G-box	CACGAC	6	+	Zea mays	cis-acting regulatory element involved in light responsiveness
HrMADS32	G-box	CACGTC	6	+	Zea mays	cis-acting regulatory element involved in light responsiveness
HrMADS32	GT1-motif	GGTTAAT	7	-	Avena sativa	light responsive element
HrMADS32	GT1-motif	GGTTAA	6	-	Arabidopsis thaliana	light responsive element
HrMADS32	TCT-motif	TCTTAC	6	+	Arabidopsis thaliana	part of a light responsive element
HrMADS32	TGA-element	AACGAC	6	-	Brassica oleracea	auxin-responsive element
HrMADS33	AAAC-motif	CAATCAAAACCT	11	-	Spinacia oleracea	light responsive element
HrMADS33	ACE	CTAACGTATT	9	-	Petroselinum crispum	cis-acting element involved in light responsiveness
HrMADS33	AE-box	AGAAACAA	8	-	Arabidopsis thaliana	part of a module for light response
HrMADS33	ARE	AAACCA	6	+	Zea mays	cis-acting regulatory element essential for the anaerobic induction
HrMADS33	AT1-motif	AATTATTTTTTATT	13	-	Solanum tuberosum	part of a light responsive module
HrMADS33	Box 4	ATTAAT	6	+	Petroselinum crispum	part of a conserved DNA module involved in light responsiveness
HrMADS33	Box 4	ATTAAT	6	+	Petroselinum crispum	part of a conserved DNA module involved in light responsiveness
HrMADS33	Box 4	ATTAAT	6	+	Petroselinum crispum	part of a conserved DNA module involved in light responsiveness
HrMADS33	Box 4	ATTAAT	6	-	Petroselinum crispum	part of a conserved DNA module involved in light responsiveness
HrMADS33	Box 4	ATTAAT	6	-	Petroselinum crispum	part of a conserved DNA module involved in light responsiveness
HrMADS33	circadian	CAAAGATATC	9	+	Lycopersicon esculentum	cis-acting regulatory element involved in circadian control
HrMADS33	GA-motif	ATAGATAA	8	-	Arabidopsis thaliana	part of a light responsive element
HrMADS33	GARE-motif	TCTGTTG	7	-	Brassica oleracea	gibberellin-responsive element
HrMADS33	GATA-motif	AAGGATAAGG	9	+	Solanum tuberosum	part of a light responsive element
HrMADS33	G-box	CACGAC	6	+	Zea mays	cis-acting regulatory element involved in light responsiveness
HrMADS33	GT1-motif	GGTTAA	6	-	Arabidopsis thaliana	light responsive element
HrMADS33	I-box	cCATATCCAAT	10	-	Flaveria trinervia	part of a light responsive element
HrMADS33	I-box	gGATAAGGTG	9	+	Zea mays	part of a light responsive element
HrMADS33	I-box	AGATAAGG	8	+	Triticum aestivum	part of a light responsive element
HrMADS33	LAMP-element	CCTTATCCA	9	-	Spinacia oleracea	part of a light responsive element
HrMADS33	MRE	AACCTAA	7	-	Petroselinum crispum	MYB binding site involved in light responsiveness
HrMADS33	TCCC-motif	TCTCCCT	7	+	Spinacia oleracea	part of a light responsive element
HrMADS33	TCT-motif	TCTTAC	6	+	Arabidopsis thaliana	part of a light responsive element
HrMADS34	ABRE	ACGTG	5	-	Arabidopsis thaliana	cis-acting element involved in the abscisic acid responsiveness
HrMADS34	ARE	AAACCA	6	+	Zea mays	cis-acting regulatory element essential for the anaerobic induction
HrMADS34	ARE	AAACCA	6	-	Zea mays	cis-acting regulatory element essential for the anaerobic induction
HrMADS34	AT1-motif	AATTATTTTTTATT	13	+	Solanum tuberosum	part of a light responsive module
HrMADS34	Box 4	ATTAAT	6	+	Petroselinum crispum	part of a conserved DNA module involved in light responsiveness
HrMADS34	Box 4	ATTAAT	6	-	Petroselinum crispum	part of a conserved DNA module involved in light responsiveness
HrMADS34	CGTCA-motif	CGTCA	5	+	Hordeum vulgare	cis-acting regulatory element involved in the MeJA-responsiveness
HrMADS34	chs-CMA1a	TTACTTAA	8	+	Daucus carota	part of a light responsive element
HrMADS34	chs-CMA2a	TCACTTGA	8	-	Petroselinum crispum	part of a light responsive element
HrMADS34	GATA-motif	AAGATAAGATT	10	-	Arabidopsis thaliana	part of a light responsive element
HrMADS34	GATA-motif	AAGATAAGATT	10	+	Arabidopsis thaliana	part of a light responsive element
HrMADS34	GATA-motif	GATAGGA	7	+	Arabidopsis thaliana	part of a light responsive element
HrMADS34	G-Box	CACGTT	6	+	Pisum sativum	cis-acting regulatory element involved in light responsiveness
HrMADS34	GT1-motif	GGTTAAT	7	-	Avena sativa	light responsive element
HrMADS34	GT1-motif	GGTTAA	6	-	Arabidopsis thaliana	light responsive element
HrMADS34	MRE	AACCTAA	7	+	Petroselinum crispum	MYB binding site involved in light responsiveness
HrMADS34	MRE	AACCTAA	7	+	Petroselinum crispum	MYB binding site involved in light responsiveness
HrMADS34	O2-site	GATGA(C/T)(A/G)TG(A/G)	8	+	Zea mays	cis-acting regulatory element involved in zein metabolism regulation
HrMADS34	Sp1	GGGCGG	6	+	Oryza sativa	light responsive element
HrMADS34	TCCC-motif	TCTCCCT	7	+	Spinacia oleracea	part of a light responsive element
HrMADS34	TC-rich repeats	GTTTTCTTAC	9	+	Nicotiana tabacum	cis-acting element involved in defense and stress responsiveness
HrMADS34	TCT-motif	TCTTAC	6	+	Arabidopsis thaliana	part of a light responsive element
HrMADS34	TCT-motif	TCTTAC	6	+	Arabidopsis thaliana	part of a light responsive element
HrMADS34	TCT-motif	TCTTAC	6	+	Arabidopsis thaliana	part of a light responsive element
HrMADS34	TGACG-motif	TGACG	5	-	Hordeum vulgare	cis-acting regulatory element involved in the MeJA-responsiveness
HrMADS35	ABRE	ACGTG	5	+	Arabidopsis thaliana	cis-acting element involved in the abscisic acid responsiveness
HrMADS35	ABRE	ACGTG	5	-	Arabidopsis thaliana	cis-acting element involved in the abscisic acid responsiveness
HrMADS35	ARE	AAACCA	6	-	Zea mays	cis-acting regulatory element essential for the anaerobic induction
HrMADS35	AT1-motif	AATTATTTTTTATT	13	+	Solanum tuberosum	part of a light responsive module
HrMADS35	Box 4	ATTAAT	6	+	Petroselinum crispum	part of a conserved DNA module involved in light responsiveness
HrMADS35	Box 4	ATTAAT	6	+	Petroselinum crispum	part of a conserved DNA module involved in light responsiveness
HrMADS35	Box 4	ATTAAT	6	+	Petroselinum crispum	part of a conserved DNA module involved in light responsiveness
HrMADS35	Box 4	ATTAAT	6	-	Petroselinum crispum	part of a conserved DNA module involved in light responsiveness
HrMADS35	Box 4	ATTAAT	6	-	Petroselinum crispum	part of a conserved DNA module involved in light responsiveness
HrMADS35	Box 4	ATTAAT	6	-	Petroselinum crispum	part of a conserved DNA module involved in light responsiveness
HrMADS35	CGTCA-motif	CGTCA	5	+	Hordeum vulgare	cis-acting regulatory element involved in the MeJA-responsiveness
HrMADS35	chs-CMA1a	TTACTTAA	8	-	Daucus carota	part of a light responsive element
HrMADS35	GATA-motif	AAGGATAAGG	10	+	Solanum tuberosum	part of a light responsive element
HrMADS35	G-Box	CACGTT	6	-	Pisum sativum	cis-acting regulatory element involved in light responsiveness
HrMADS35	G-box	TAACACGTAG	9	-	Brassica oleracea	cis-acting regulatory element involved in light responsiveness
HrMADS35	G-box	CACGTC	6	+	Zea mays	cis-acting regulatory element involved in light responsiveness
HrMADS35	GCN4_motif	TGAGTCA	7	-	Oryza sativa	cis-regulatory element involved in endosperm expression
HrMADS35	GT1-motif	GGTTAA	6	+	Arabidopsis thaliana	light responsive element
HrMADS35	GT1-motif	GGTTAA	6	+	Arabidopsis thaliana	light responsive element
HrMADS35	I-box	ccttatcct	9	-	Arabidopsis thaliana	part of a light responsive element
HrMADS35	I-box	gGATAAGGTG	9	+	Zea mays	part of a light responsive element
HrMADS35	MRE	AACCTAA	7	-	Petroselinum crispum	MYB binding site involved in light responsiveness
HrMADS35	O2-site	GATGACATGG	9	+	Zea mays	cis-acting regulatory element involved in zein metabolism regulation
HrMADS35	TCA-element	CCATCTTTTT	9	+	Nicotiana tabacum	cis-acting element involved in salicylic acid responsiveness
HrMADS35	TCA-element	TCAGAAGAGG	9	+	Brassica oleracea	cis-acting element involved in salicylic acid responsiveness
HrMADS35	TCT-motif	TCTTAC	6	+	Arabidopsis thaliana	part of a light responsive element
HrMADS35	TCT-motif	TCTTAC	6	-	Arabidopsis thaliana	part of a light responsive element
HrMADS35	TGACG-motif	TGACG	5	-	Hordeum vulgare	cis-acting regulatory element involved in the MeJA-responsiveness
HrMADS35	TGA-element	AACGAC	6	-	Brassica oleracea	auxin-responsive element
HrMADS36	ABRE	ACGTG	5	-	Arabidopsis thaliana	cis-acting element involved in the abscisic acid responsiveness
HrMADS36	ABRE	ACGTG	5	-	Arabidopsis thaliana	cis-acting element involved in the abscisic acid responsiveness
HrMADS36	ABRE	CACGTG	6	-	Arabidopsis thaliana	cis-acting element involved in the abscisic acid responsiveness
HrMADS36	ABRE	ACGTG	5	+	Arabidopsis thaliana	cis-acting element involved in the abscisic acid responsiveness
HrMADS36	ARE	AAACCA	6	-	Zea mays	cis-acting regulatory element essential for the anaerobic induction
HrMADS36	ARE	AAACCA	6	-	Zea mays	cis-acting regulatory element essential for the anaerobic induction
HrMADS36	AT1-motif	AATTATTTTTTATT	13	-	Solanum tuberosum	part of a light responsive module
HrMADS36	Box 4	ATTAAT	6	+	Petroselinum crispum	part of a conserved DNA module involved in light responsiveness
HrMADS36	Box 4	ATTAAT	6	+	Petroselinum crispum	part of a conserved DNA module involved in light responsiveness
HrMADS36	Box 4	ATTAAT	6	+	Petroselinum crispum	part of a conserved DNA module involved in light responsiveness
HrMADS36	Box 4	ATTAAT	6	+	Petroselinum crispum	part of a conserved DNA module involved in light responsiveness
HrMADS36	Box 4	ATTAAT	6	+	Petroselinum crispum	part of a conserved DNA module involved in light responsiveness
HrMADS36	Box 4	ATTAAT	6	+	Petroselinum crispum	part of a conserved DNA module involved in light responsiveness
HrMADS36	Box 4	ATTAAT	6	+	Petroselinum crispum	part of a conserved DNA module involved in light responsiveness
HrMADS36	Box 4	ATTAAT	6	-	Petroselinum crispum	part of a conserved DNA module involved in light responsiveness
HrMADS36	Box 4	ATTAAT	6	-	Petroselinum crispum	part of a conserved DNA module involved in light responsiveness
HrMADS36	Box 4	ATTAAT	6	-	Petroselinum crispum	part of a conserved DNA module involved in light responsiveness
HrMADS36	Box 4	ATTAAT	6	-	Petroselinum crispum	part of a conserved DNA module involved in light responsiveness
HrMADS36	Box 4	ATTAAT	6	-	Petroselinum crispum	part of a conserved DNA module involved in light responsiveness
HrMADS36	Box 4	ATTAAT	6	-	Petroselinum crispum	part of a conserved DNA module involved in light responsiveness
HrMADS36	chs-CMA1a	TTACTTAA	8	-	Daucus carota	part of a light responsive element
HrMADS36	chs-CMA1a	TTACTTAA	8	-	Daucus carota	part of a light responsive element
HrMADS36	GATA-motif	AAGGATAAGG	9	+	Solanum tuberosum	part of a light responsive element
HrMADS36	GATA-motif	AAGATAAGATT	10	-	Arabidopsis thaliana	part of a light responsive element
HrMADS36	GATA-motif	AAGGATAAGG	9	-	Solanum tuberosum	part of a light responsive element
HrMADS36	G-box	TACGTG	6	-	Arabidopsis thaliana	cis-acting regulatory element involved in light responsiveness
HrMADS36	G-box	CACGTG	6	-	Arabidopsis thaliana	cis-acting regulatory element involved in light responsiveness
HrMADS36	G-Box	CACGTT	6	+	Pisum sativum	cis-acting regulatory element involved in light responsiveness
HrMADS36	G-Box	CACGTG	6	-	Pisum sativum	cis-acting regulatory element involved in light responsiveness
HrMADS36	LTR	CCGAAA	6	+	Hordeum vulgare	cis-acting element involved in low-temperature responsiveness
HrMADS36	MRE	AACCTAA	7	+	Petroselinum crispum	MYB binding site involved in light responsiveness
HrMADS36	MRE	AACCTAA	7	+	Petroselinum crispum	MYB binding site involved in light responsiveness
HrMADS36	P-box	CCTTTTG	7	-	Oryza sativa	gibberellin-responsive element
HrMADS36	TCA-element	CCATCTTTTT	9	+	Nicotiana tabacum	cis-acting element involved in salicylic acid responsiveness
HrMADS36	TC-rich repeats	ATTCTCTAAC	9	+	Nicotiana tabacum	cis-acting element involved in defense and stress responsiveness
HrMADS36	TGA-element	AACGAC	6	-	Brassica oleracea	auxin-responsive element
HrMADS37	AE-box	AGAAACAA	8	+	Arabidopsis thaliana	part of a module for light response
HrMADS37	Box 4	ATTAAT	6	+	Petroselinum crispum	part of a conserved DNA module involved in light responsiveness
HrMADS37	Box 4	ATTAAT	6	+	Petroselinum crispum	part of a conserved DNA module involved in light responsiveness
HrMADS37	Box 4	ATTAAT	6	+	Petroselinum crispum	part of a conserved DNA module involved in light responsiveness
HrMADS37	Box 4	ATTAAT	6	+	Petroselinum crispum	part of a conserved DNA module involved in light responsiveness
HrMADS37	Box 4	ATTAAT	6	-	Petroselinum crispum	part of a conserved DNA module involved in light responsiveness
HrMADS37	Box 4	ATTAAT	6	-	Petroselinum crispum	part of a conserved DNA module involved in light responsiveness
HrMADS37	Box 4	ATTAAT	6	-	Petroselinum crispum	part of a conserved DNA module involved in light responsiveness
HrMADS37	Box 4	ATTAAT	6	-	Petroselinum crispum	part of a conserved DNA module involved in light responsiveness
HrMADS37	Box 4	ATTAAT	6	-	Petroselinum crispum	part of a conserved DNA module involved in light responsiveness
HrMADS37	GA-motif	ATAGATAA	8	+	Arabidopsis thaliana	part of a light responsive element
HrMADS37	GATA-motif	AAGGATAAGG	9	+	Solanum tuberosum	part of a light responsive element
HrMADS37	GATA-motif	GATAGGG	7	+	Pisum sativum	part of a light responsive element
HrMADS37	GATA-motif	AAGATAAGATT	10	-	Arabidopsis thaliana	part of a light responsive element
HrMADS37	GT1-motif	GGTTAA	6	-	Arabidopsis thaliana	light responsive element
HrMADS37	P-box	CCTTTTG	7	-	Oryza sativa	gibberellin-responsive element
HrMADS37	TC-rich repeats	GTTTTCTTAC	9	-	Nicotiana tabacum	cis-acting element involved in defense and stress responsiveness
HrMADS37	TCT-motif	TCTTAC	6	-	Arabidopsis thaliana	part of a light responsive element
HrMADS38	ABRE	ACGTG	5	-	Arabidopsis thaliana	cis-acting element involved in the abscisic acid responsiveness
HrMADS38	ATCT-motif	AATCTAATCC	9	-	Pisum sativum	part of a conserved DNA module involved in light responsiveness
HrMADS38	Box 4	ATTAAT	6	+	Petroselinum crispum	part of a conserved DNA module involved in light responsiveness
HrMADS38	Box 4	ATTAAT	6	-	Petroselinum crispum	part of a conserved DNA module involved in light responsiveness
HrMADS38	chs-CMA1a	TTACTTAA	8	-	Daucus carota	part of a light responsive element
HrMADS38	Gap-box	CAAATGAA(A/G)A	9	+	Arabidopsis thaliana	part of a light responsive element
HrMADS38	G-Box	CACGTT	6	+	Pisum sativum	cis-acting regulatory element involved in light responsiveness
HrMADS38	MRE	AACCTAA	7	+	Petroselinum crispum	MYB binding site involved in light responsiveness
HrMADS38	MRE	AACCTAA	7	-	Petroselinum crispum	MYB binding site involved in light responsiveness
HrMADS38	MRE	AACCTAA	7	+	Petroselinum crispum	MYB binding site involved in light responsiveness
HrMADS38	P-box	CCTTTTG	7	+	Oryza sativa	gibberellin-responsive element
HrMADS38	TATC-box	TATCCCA	7	-	Oryza sativa	cis-acting element involved in gibberellin-responsiveness
HrMADS39	ARE	AAACCA	6	-	Zea mays	cis-acting regulatory element essential for the anaerobic induction
HrMADS39	ARE	AAACCA	6	+	Zea mays	cis-acting regulatory element essential for the anaerobic induction
HrMADS39	ARE	AAACCA	6	-	Zea mays	cis-acting regulatory element essential for the anaerobic induction
HrMADS39	AT-rich element	ATAGAAATCAA	10	-	Glycine max	binding site of AT-rich DNA binding protein (ATBP-1)
HrMADS39	CCAAT-box	CAACGG	6	+	Hordeum vulgare	MYBHv1 binding site
HrMADS39	CCAAT-box	CAACGG	6	-	Hordeum vulgare	MYBHv1 binding site
HrMADS39	GA-motif	ATAGATAA	8	+	Arabidopsis thaliana	part of a light responsive element
HrMADS39	GATA-motif	AAGATAAGATT	10	+	Arabidopsis thaliana	part of a light responsive element
HrMADS39	GT1-motif	GGTTAA	6	-	Arabidopsis thaliana	light responsive element
HrMADS39	LAMP-element	CTTTATCA	8	-	Pisum sativum	part of a light responsive element
HrMADS39	LAMP-element	CTTTATCA	8	+	Pisum sativum	part of a light responsive element
HrMADS39	MBS	CAACTG	6	+	Arabidopsis thaliana	MYB binding site involved in drought-inducibility
HrMADS39	MBS	CAACTG	6	+	Arabidopsis thaliana	MYB binding site involved in drought-inducibility
HrMADS39	TCA-element	CCATCTTTTT	9	-	Nicotiana tabacum	cis-acting element involved in salicylic acid responsiveness
HrMADS39	TCT-motif	TCTTAC	6	-	Arabidopsis thaliana	part of a light responsive element
HrMADS39	TGA-element	AACGAC	6	-	Brassica oleracea	auxin-responsive element
HrMADS4	3-AF1 binding site	TAAGAGAGGAA	11	-	Solanum tuberosum	light responsive element
HrMADS4	ABRE	ACGTG	5	-	Arabidopsis thaliana	cis-acting element involved in the abscisic acid responsiveness
HrMADS4	ABRE	ACGTG	5	-	Arabidopsis thaliana	cis-acting element involved in the abscisic acid responsiveness
HrMADS4	ARE	AAACCA	6	-	Zea mays	cis-acting regulatory element essential for the anaerobic induction
HrMADS4	ARE	AAACCA	6	-	Zea mays	cis-acting regulatory element essential for the anaerobic induction
HrMADS4	ARE	AAACCA	6	+	Zea mays	cis-acting regulatory element essential for the anaerobic induction
HrMADS4	ARE	AAACCA	6	-	Zea mays	cis-acting regulatory element essential for the anaerobic induction
HrMADS4	AT-rich element	ATAGAAATCAA	11	-	Glycine max	binding site of AT-rich DNA binding protein (ATBP-1)
HrMADS4	Box 4	ATTAAT	6	+	Petroselinum crispum	part of a conserved DNA module involved in light responsiveness
HrMADS4	Box 4	ATTAAT	6	-	Petroselinum crispum	part of a conserved DNA module involved in light responsiveness
HrMADS4	Box II	TGGTAATAA	9	+	Solanum tuberosum	part of a light responsive element
HrMADS4	CGTCA-motif	CGTCA	5	+	Hordeum vulgare	cis-acting regulatory element involved in the MeJA-responsiveness
HrMADS4	CGTCA-motif	CGTCA	5	-	Hordeum vulgare	cis-acting regulatory element involved in the MeJA-responsiveness
HrMADS4	CGTCA-motif	CGTCA	5	-	Hordeum vulgare	cis-acting regulatory element involved in the MeJA-responsiveness
HrMADS4	GATA-motif	GATAGGG	7	-	Pisum sativum	part of a light responsive element
HrMADS4	G-box	CACGTC	6	+	Zea mays	cis-acting regulatory element involved in light responsiveness
HrMADS4	G-box	TACGTG	6	-	Arabidopsis thaliana	cis-acting regulatory element involved in light responsiveness
HrMADS4	GT1-motif	GGTTAA	6	+	Arabidopsis thaliana	light responsive element
HrMADS4	LAMP-element	CTTTATCA	8	-	Pisum sativum	part of a light responsive element
HrMADS4	MBS	CAACTG	6	+	Arabidopsis thaliana	MYB binding site involved in drought-inducibility
HrMADS4	O2-site	GATGATGTGG	9	-	Zea mays	cis-acting regulatory element involved in zein metabolism regulation
HrMADS4	TGACG-motif	TGACG	5	-	Hordeum vulgare	cis-acting regulatory element involved in the MeJA-responsiveness
HrMADS4	TGACG-motif	TGACG	5	+	Hordeum vulgare	cis-acting regulatory element involved in the MeJA-responsiveness
HrMADS4	TGACG-motif	TGACG	5	+	Hordeum vulgare	cis-acting regulatory element involved in the MeJA-responsiveness
HrMADS4	WUN-motif	AAATTTCCT	9	+	Brassica oleracea	wound-responsive element
HrMADS40	ABRE	ACGTG	5	-	Arabidopsis thaliana	cis-acting element involved in the abscisic acid responsiveness
HrMADS40	ABRE	CGCACGTGTC	9	+	Hordeum vulgare	cis-acting element involved in the abscisic acid responsiveness
HrMADS40	ABRE	CACGTG	6	-	Arabidopsis thaliana	cis-acting element involved in the abscisic acid responsiveness
HrMADS40	ABRE	ACGTG	5	+	Arabidopsis thaliana	cis-acting element involved in the abscisic acid responsiveness
HrMADS40	AE-box	AGAAACAA	8	+	Arabidopsis thaliana	part of a module for light response
HrMADS40	AE-box	AGAAACTT	8	-	Arabidopsis thaliana	part of a module for light response
HrMADS40	ARE	AAACCA	6	+	Zea mays	cis-acting regulatory element essential for the anaerobic induction
HrMADS40	ARE	AAACCA	6	+	Zea mays	cis-acting regulatory element essential for the anaerobic induction
HrMADS40	ARE	AAACCA	6	+	Zea mays	cis-acting regulatory element essential for the anaerobic induction
HrMADS40	ARE	AAACCA	6	+	Zea mays	cis-acting regulatory element essential for the anaerobic induction
HrMADS40	ARE	AAACCA	6	-	Zea mays	cis-acting regulatory element essential for the anaerobic induction
HrMADS40	ARE	AAACCA	6	-	Zea mays	cis-acting regulatory element essential for the anaerobic induction
HrMADS40	Box 4	ATTAAT	6	+	Petroselinum crispum	part of a conserved DNA module involved in light responsiveness
HrMADS40	Box 4	ATTAAT	6	+	Petroselinum crispum	part of a conserved DNA module involved in light responsiveness
HrMADS40	Box 4	ATTAAT	6	-	Petroselinum crispum	part of a conserved DNA module involved in light responsiveness
HrMADS40	Box 4	ATTAAT	6	-	Petroselinum crispum	part of a conserved DNA module involved in light responsiveness
HrMADS40	CAT-box	GCCACT	6	+	Arabidopsis thaliana	cis-acting regulatory element related to meristem expression
HrMADS40	CGTCA-motif	CGTCA	5	-	Hordeum vulgare	cis-acting regulatory element involved in the MeJA-responsiveness
HrMADS40	CGTCA-motif	CGTCA	5	-	Hordeum vulgare	cis-acting regulatory element involved in the MeJA-responsiveness
HrMADS40	GATA-motif	AAGGATAAGG	9	+	Solanum tuberosum	part of a light responsive element
HrMADS40	G-box	TACGTG	6	-	Arabidopsis thaliana	cis-acting regulatory element involved in light responsiveness
HrMADS40	G-box	CACGTG	6	-	Arabidopsis thaliana	cis-acting regulatory element involved in light responsiveness
HrMADS40	G-Box	CACGTG	6	-	Pisum sativum	cis-acting regulatory element involved in light responsiveness
HrMADS40	I-box	gGATAAGGTG	9	+	Zea mays	part of a light responsive element
HrMADS40	P-box	CCTTTTG	7	+	Oryza sativa	gibberellin-responsive element
HrMADS40	TC-rich repeats	ATTCTCTAAC	9	+	Nicotiana tabacum	cis-acting element involved in defense and stress responsiveness
HrMADS40	TGACG-motif	TGACG	5	+	Hordeum vulgare	cis-acting regulatory element involved in the MeJA-responsiveness
HrMADS40	TGACG-motif	TGACG	5	+	Hordeum vulgare	cis-acting regulatory element involved in the MeJA-responsiveness
HrMADS41	AE-box	AGAAACTT	8	+	Arabidopsis thaliana	part of a module for light response
HrMADS41	ARE	AAACCA	6	-	Zea mays	cis-acting regulatory element essential for the anaerobic induction
HrMADS41	ARE	AAACCA	6	+	Zea mays	cis-acting regulatory element essential for the anaerobic induction
HrMADS41	ARE	AAACCA	6	-	Zea mays	cis-acting regulatory element essential for the anaerobic induction
HrMADS41	AT1-motif	AATTATTTTTTATT	13	+	Solanum tuberosum	part of a light responsive module
HrMADS41	AT-rich sequence	TAAAATACT	9	-	Pisum sativum	element for maximal elicitor-mediated activation (2copies)
HrMADS41	Box 4	ATTAAT	6	+	Petroselinum crispum	part of a conserved DNA module involved in light responsiveness
HrMADS41	Box 4	ATTAAT	6	+	Petroselinum crispum	part of a conserved DNA module involved in light responsiveness
HrMADS41	Box 4	ATTAAT	6	+	Petroselinum crispum	part of a conserved DNA module involved in light responsiveness
HrMADS41	Box 4	ATTAAT	6	+	Petroselinum crispum	part of a conserved DNA module involved in light responsiveness
HrMADS41	Box 4	ATTAAT	6	-	Petroselinum crispum	part of a conserved DNA module involved in light responsiveness
HrMADS41	Box 4	ATTAAT	6	-	Petroselinum crispum	part of a conserved DNA module involved in light responsiveness
HrMADS41	CAT-box	GCCACT	6	-	Arabidopsis thaliana	cis-acting regulatory element related to meristem expression
HrMADS41	CAT-box	GCCACT	6	+	Arabidopsis thaliana	cis-acting regulatory element related to meristem expression
HrMADS41	CCAAT-box	CAACGG	6	+	Hordeum vulgare	MYBHv1 binding site
HrMADS41	CGTCA-motif	CGTCA	5	+	Hordeum vulgare	cis-acting regulatory element involved in the MeJA-responsiveness
HrMADS41	chs-CMA1a	TTACTTAA	8	+	Daucus carota	part of a light responsive element
HrMADS41	circadian	CAAAGATATC	9	+	Lycopersicon esculentum	cis-acting regulatory element involved in circadian control
HrMADS41	GT1-motif	GGTTAA	6	+	Arabidopsis thaliana	light responsive element
HrMADS41	GT1-motif	GGTTAAT	7	+	Avena sativa	light responsive element
HrMADS41	O2-site	GATGATGTGG	9	-	Zea mays	cis-acting regulatory element involved in zein metabolism regulation
HrMADS41	O2-site	GTTGACGTGA	9	+	Zea mays	cis-acting regulatory element involved in zein metabolism regulation
HrMADS41	TGACG-motif	TGACG	5	-	Hordeum vulgare	cis-acting regulatory element involved in the MeJA-responsiveness
HrMADS42	ABRE	ACGTG	5	+	Arabidopsis thaliana	cis-acting element involved in the abscisic acid responsiveness
HrMADS42	ABRE	AACCCGG	7	+	Arabidopsis thaliana	cis-acting element involved in the abscisic acid responsiveness
HrMADS42	ABRE	CACGTG	6	-	Arabidopsis thaliana	cis-acting element involved in the abscisic acid responsiveness
HrMADS42	ABRE	ACGTG	5	+	Arabidopsis thaliana	cis-acting element involved in the abscisic acid responsiveness
HrMADS42	ABRE	CGTACGTGCA	9	-	Hordeum vulgare	cis-acting element involved in the abscisic acid responsiveness
HrMADS42	ABRE	ACGTG	5	-	Arabidopsis thaliana	cis-acting element involved in the abscisic acid responsiveness
HrMADS42	AE-box	AGAAACTT	8	-	Arabidopsis thaliana	part of a module for light response
HrMADS42	ARE	AAACCA	6	-	Zea mays	cis-acting regulatory element essential for the anaerobic induction
HrMADS42	AT1-motif	AATTATTTTTTATT	13	+	Solanum tuberosum	part of a light responsive module
HrMADS42	AT-rich element	ATAGAAATCAA	10	-	Glycine max	binding site of AT-rich DNA binding protein (ATBP-1)
HrMADS42	Box 4	ATTAAT	6	+	Petroselinum crispum	part of a conserved DNA module involved in light responsiveness
HrMADS42	Box 4	ATTAAT	6	+	Petroselinum crispum	part of a conserved DNA module involved in light responsiveness
HrMADS42	Box 4	ATTAAT	6	+	Petroselinum crispum	part of a conserved DNA module involved in light responsiveness
HrMADS42	Box 4	ATTAAT	6	-	Petroselinum crispum	part of a conserved DNA module involved in light responsiveness
HrMADS42	Box 4	ATTAAT	6	-	Petroselinum crispum	part of a conserved DNA module involved in light responsiveness
HrMADS42	circadian	CAAAGATATC	9	+	Lycopersicon esculentum	cis-acting regulatory element involved in circadian control
HrMADS42	GA-motif	ATAGATAA	8	+	Arabidopsis thaliana	part of a light responsive element
HrMADS42	Gap-box	CAAATGAA(A/G)A	9.5	+	Arabidopsis thaliana	part of a light responsive element
HrMADS42	GATA-motif	AAGATAAGATT	10	+	Arabidopsis thaliana	part of a light responsive element
HrMADS42	G-Box	CACGTG	6	-	Pisum sativum	cis-acting regulatory element involved in light responsiveness
HrMADS42	G-box	TACGTG	6	+	Arabidopsis thaliana	cis-acting regulatory element involved in light responsiveness
HrMADS42	G-box	CACGTG	6	-	Arabidopsis thaliana	cis-acting regulatory element involved in light responsiveness
HrMADS42	G-box	TACGTG	6	-	Arabidopsis thaliana	cis-acting regulatory element involved in light responsiveness
HrMADS42	GT1-motif	GGTTAA	6	+	Arabidopsis thaliana	light responsive element
HrMADS42	GT1-motif	GGTTAA	6	+	Arabidopsis thaliana	light responsive element
HrMADS42	GT1-motif	GGTTAA	6	-	Arabidopsis thaliana	light responsive element
HrMADS42	LAMP-element	CTTTATCA	8	+	Pisum sativum	part of a light responsive element
HrMADS42	LAMP-element	CTTTATCA	8	+	Pisum sativum	part of a light responsive element
HrMADS42	MBS	CAACTG	6	-	Arabidopsis thaliana	MYB binding site involved in drought-inducibility
HrMADS42	MBSI	aaaAaaC(G/C)GTTA	10.5	-	Petunia hybrida	MYB binding site involved in flavonoid biosynthetic genes regulation
HrMADS42	MRE	AACCTAA	7	-	Petroselinum crispum	MYB binding site involved in light responsiveness
HrMADS42	SARE	TTCGACCATCTT	11	+	Nicotiana tabacum	cis-acting element involved in salicylic acid responsiveness
HrMADS42	TATC-box	TATCCCA	7	-	Oryza sativa	cis-acting element involved in gibberellin-responsiveness
HrMADS42	TCA-element	CCATCTTTTT	9	-	Nicotiana tabacum	cis-acting element involved in salicylic acid responsiveness
HrMADS42	TCA-element	CCATCTTTTT	9	+	Nicotiana tabacum	cis-acting element involved in salicylic acid responsiveness
HrMADS43	AAAC-motif	CAATCAAAACCT	11	+	Spinacia oleracea	light responsive element
HrMADS43	ARE	AAACCA	6	-	Zea mays	cis-acting regulatory element essential for the anaerobic induction
HrMADS43	ARE	AAACCA	6	+	Zea mays	cis-acting regulatory element essential for the anaerobic induction
HrMADS43	ARE	AAACCA	6	+	Zea mays	cis-acting regulatory element essential for the anaerobic induction
HrMADS43	AT1-motif	AATTATTTTTTATT	13	-	Solanum tuberosum	part of a light responsive module
HrMADS43	Box 4	ATTAAT	6	+	Petroselinum crispum	part of a conserved DNA module involved in light responsiveness
HrMADS43	Box 4	ATTAAT	6	+	Petroselinum crispum	part of a conserved DNA module involved in light responsiveness
HrMADS43	Box 4	ATTAAT	6	+	Petroselinum crispum	part of a conserved DNA module involved in light responsiveness
HrMADS43	Box 4	ATTAAT	6	+	Petroselinum crispum	part of a conserved DNA module involved in light responsiveness
HrMADS43	Box 4	ATTAAT	6	+	Petroselinum crispum	part of a conserved DNA module involved in light responsiveness
HrMADS43	Box 4	ATTAAT	6	+	Petroselinum crispum	part of a conserved DNA module involved in light responsiveness
HrMADS43	CAG-motif	GAAAGGCAGAC	10	+	Arabidopsis thaliana	part of a light response element
HrMADS43	circadian	CAAAGATATC	9	-	Lycopersicon esculentum	cis-acting regulatory element involved in circadian control
HrMADS43	Gap-box	CAAATGAA(A/G)A	9.5	+	Arabidopsis thaliana	part of a light responsive element
HrMADS43	GATA-motif	AAGATAAGATT	11	-	Arabidopsis thaliana	part of a light responsive element
HrMADS43	GT1-motif	GGTTAA	6	-	Arabidopsis thaliana	light responsive element
HrMADS43	GT1-motif	GGTTAA	6	+	Arabidopsis thaliana	light responsive element
HrMADS43	LTR	CCGAAA	6	-	Hordeum vulgare	cis-acting element involved in low-temperature responsiveness
HrMADS43	P-box	CCTTTTG	7	+	Oryza sativa	gibberellin-responsive element
HrMADS43	TCT-motif	TCTTAC	6	-	Arabidopsis thaliana	part of a light responsive element
HrMADS43	TGA-element	AACGAC	6	-	Brassica oleracea	auxin-responsive element
HrMADS43	TGA-element	AACGAC	6	-	Brassica oleracea	auxin-responsive element
HrMADS44	ABRE	ACGTG	5	+	Arabidopsis thaliana	cis-acting element involved in the abscisic acid responsiveness
HrMADS44	ABRE	CACGTG	6	-	Arabidopsis thaliana	cis-acting element involved in the abscisic acid responsiveness
HrMADS44	ABRE	ACGTG	5	+	Arabidopsis thaliana	cis-acting element involved in the abscisic acid responsiveness
HrMADS44	ACE	CTAACGTATT	9	+	Petroselinum crispum	cis-acting element involved in light responsiveness
HrMADS44	ATCT-motif	AATCTAATCC	9	-	Pisum sativum	part of a conserved DNA module involved in light responsiveness
HrMADS44	Box 4	ATTAAT	6	+	Petroselinum crispum	part of a conserved DNA module involved in light responsiveness
HrMADS44	Box 4	ATTAAT	6	+	Petroselinum crispum	part of a conserved DNA module involved in light responsiveness
HrMADS44	Box 4	ATTAAT	6	-	Petroselinum crispum	part of a conserved DNA module involved in light responsiveness
HrMADS44	Box 4	ATTAAT	6	-	Petroselinum crispum	part of a conserved DNA module involved in light responsiveness
HrMADS44	CGTCA-motif	CGTCA	5	-	Hordeum vulgare	cis-acting regulatory element involved in the MeJA-responsiveness
HrMADS44	chs-CMA1a	TTACTTAA	8	-	Daucus carota	part of a light responsive element
HrMADS44	chs-Unit 1 m1	ACCTAACCCGG	10	+	Zea mays	part of a light responsive element
HrMADS44	G-Box	CACGTT	6	-	Pisum sativum	cis-acting regulatory element involved in light responsiveness
HrMADS44	G-Box	CACGTG	6	-	Pisum sativum	cis-acting regulatory element involved in light responsiveness
HrMADS44	G-box	CACGTG	6	-	Arabidopsis thaliana	cis-acting regulatory element involved in light responsiveness
HrMADS44	GT1-motif	GGTTAA	6	-	Arabidopsis thaliana	light responsive element
HrMADS44	GT1-motif	GGTTAA	6	+	Arabidopsis thaliana	light responsive element
HrMADS44	GT1-motif	GGTTAAT	7	+	Avena sativa	light responsive element
HrMADS44	LAMP-element	CTTTATCA	8	+	Pisum sativum	part of a light responsive element
HrMADS44	LAMP-element	CTTTATCA	8	-	Pisum sativum	part of a light responsive element
HrMADS44	MRE	AACCTAA	7	+	Petroselinum crispum	MYB binding site involved in light responsiveness
HrMADS44	TCA-element	CCATCTTTTT	9	+	Nicotiana tabacum	cis-acting element involved in salicylic acid responsiveness
HrMADS44	TCCC-motif	TCTCCCT	7	+	Spinacia oleracea	part of a light responsive element
HrMADS44	TGA-box	TGACGTAA	8	+	Glycine max	part of an auxin-responsive element
HrMADS44	TGACG-motif	TGACG	5	+	Hordeum vulgare	cis-acting regulatory element involved in the MeJA-responsiveness
HrMADS45	ARE	AAACCA	6	+	Zea mays	cis-acting regulatory element essential for the anaerobic induction
HrMADS45	ARE	AAACCA	6	+	Zea mays	cis-acting regulatory element essential for the anaerobic induction
HrMADS45	ARE	AAACCA	6	-	Zea mays	cis-acting regulatory element essential for the anaerobic induction
HrMADS45	AT1-motif	AATTATTTTTTATT	13	+	Solanum tuberosum	part of a light responsive module
HrMADS45	Box 4	ATTAAT	6	+	Petroselinum crispum	part of a conserved DNA module involved in light responsiveness
HrMADS45	Box 4	ATTAAT	6	+	Petroselinum crispum	part of a conserved DNA module involved in light responsiveness
HrMADS45	Box 4	ATTAAT	6	-	Petroselinum crispum	part of a conserved DNA module involved in light responsiveness
HrMADS45	Box 4	ATTAAT	6	-	Petroselinum crispum	part of a conserved DNA module involved in light responsiveness
HrMADS45	Gap-box	CAAATGAA(A/G)A	9	-	Arabidopsis thaliana	part of a light responsive element
HrMADS45	GATA-motif	GATAGGG	7	+	Pisum sativum	part of a light responsive element
HrMADS45	GT1-motif	GGTTAAT	7	-	Avena sativa	light responsive element
HrMADS45	GT1-motif	GGTTAA	6	-	Arabidopsis thaliana	light responsive element
HrMADS45	MRE	AACCTAA	7	+	Petroselinum crispum	MYB binding site involved in light responsiveness
HrMADS45	MRE	AACCTAA	7	+	Petroselinum crispum	MYB binding site involved in light responsiveness
HrMADS45	RY-element	CATGCATG	8	-	Helianthus annuus	cis-acting regulatory element involved in seed-specific regulation
HrMADS45	TCA-element	CCATCTTTTT	9	+	Nicotiana tabacum	cis-acting element involved in salicylic acid responsiveness
HrMADS45	TCA-element	CCATCTTTTT	9	+	Nicotiana tabacum	cis-acting element involved in salicylic acid responsiveness
HrMADS45	TC-rich repeats	ATTCTCTAAC	9	+	Nicotiana tabacum	cis-acting element involved in defense and stress responsiveness
HrMADS46	ABRE	ACGTG	5	-	Arabidopsis thaliana	cis-acting element involved in the abscisic acid responsiveness
HrMADS46	ABRE	ACGTG	5	+	Arabidopsis thaliana	cis-acting element involved in the abscisic acid responsiveness
HrMADS46	ABRE	ACGTG	5	+	Arabidopsis thaliana	cis-acting element involved in the abscisic acid responsiveness
HrMADS46	ABRE	ACGTG	5	+	Arabidopsis thaliana	cis-acting element involved in the abscisic acid responsiveness
HrMADS46	AE-box	AGAAACAA	8	-	Arabidopsis thaliana	part of a module for light response
HrMADS46	ARE	AAACCA	6	-	Zea mays	cis-acting regulatory element essential for the anaerobic induction
HrMADS46	ARE	AAACCA	6	-	Zea mays	cis-acting regulatory element essential for the anaerobic induction
HrMADS46	ARE	AAACCA	6	-	Zea mays	cis-acting regulatory element essential for the anaerobic induction
HrMADS46	Box 4	ATTAAT	6	+	Petroselinum crispum	part of a conserved DNA module involved in light responsiveness
HrMADS46	Box 4	ATTAAT	6	+	Petroselinum crispum	part of a conserved DNA module involved in light responsiveness
HrMADS46	Box 4	ATTAAT	6	+	Petroselinum crispum	part of a conserved DNA module involved in light responsiveness
HrMADS46	Box 4	ATTAAT	6	+	Petroselinum crispum	part of a conserved DNA module involved in light responsiveness
HrMADS46	Box 4	ATTAAT	6	-	Petroselinum crispum	part of a conserved DNA module involved in light responsiveness
HrMADS46	Box 4	ATTAAT	6	-	Petroselinum crispum	part of a conserved DNA module involved in light responsiveness
HrMADS46	CAG-motif	GAAAGGCAGAC	10	-	Arabidopsis thaliana	part of a light response element
HrMADS46	CGTCA-motif	CGTCA	5	-	Hordeum vulgare	cis-acting regulatory element involved in the MeJA-responsiveness
HrMADS46	GA-motif	ATAGATAA	8	-	Arabidopsis thaliana	part of a light responsive element
HrMADS46	GARE-motif	TCTGTTG	7	+	Brassica oleracea	gibberellin-responsive element
HrMADS46	G-box	CACGTC	6	+	Zea mays	cis-acting regulatory element involved in light responsiveness
HrMADS46	G-box	CCACGTAA	8	-	Brassica napus	cis-acting regulatory element involved in light responsiveness
HrMADS46	G-box	TACGTG	6	+	Arabidopsis thaliana	cis-acting regulatory element involved in light responsiveness
HrMADS46	G-box	TACGTG	6	+	Arabidopsis thaliana	cis-acting regulatory element involved in light responsiveness
HrMADS46	G-box	CACGTC	6	-	Zea mays	cis-acting regulatory element involved in light responsiveness
HrMADS46	G-box	CACGAC	6	-	Zea mays	cis-acting regulatory element involved in light responsiveness
HrMADS46	GCN4_motif	TGAGTCA	7	-	Oryza sativa	cis-regulatory element involved in endosperm expression
HrMADS46	GT1-motif	GGTTAA	6	-	Arabidopsis thaliana	light responsive element
HrMADS46	GT1-motif	GGTTAAT	7	+	Avena sativa	light responsive element
HrMADS46	LTR	CCGAAA	6	+	Hordeum vulgare	cis-acting element involved in low-temperature responsiveness
HrMADS46	LTR	CCGAAA	6	-	Hordeum vulgare	cis-acting element involved in low-temperature responsiveness
HrMADS46	LTR	CCGAAA	6	-	Hordeum vulgare	cis-acting element involved in low-temperature responsiveness
HrMADS46	TC-rich repeats	ATTCTCTAAC	9	+	Nicotiana tabacum	cis-acting element involved in defense and stress responsiveness
HrMADS46	TCT-motif	TCTTAC	6	+	Arabidopsis thaliana	part of a light responsive element
HrMADS46	TGACG-motif	TGACG	5	+	Hordeum vulgare	cis-acting regulatory element involved in the MeJA-responsiveness
HrMADS46	TGA-element	AACGAC	6	+	Brassica oleracea	auxin-responsive element
HrMADS46	TGA-element	AACGAC	6	-	Brassica oleracea	auxin-responsive element
HrMADS46	TGA-element	AACGAC	6	-	Brassica oleracea	auxin-responsive element
HrMADS46	TGA-element	AACGAC	6	-	Brassica oleracea	auxin-responsive element
HrMADS47	ABRE	ACGTG	5	+	Arabidopsis thaliana	cis-acting element involved in the abscisic acid responsiveness
HrMADS47	ABRE	CACGTG	6	-	Arabidopsis thaliana	cis-acting element involved in the abscisic acid responsiveness
HrMADS47	ABRE	ACGTG	5	+	Arabidopsis thaliana	cis-acting element involved in the abscisic acid responsiveness
HrMADS47	AE-box	AGAAACTT	8	-	Arabidopsis thaliana	part of a module for light response
HrMADS47	ARE	AAACCA	6	-	Zea mays	cis-acting regulatory element essential for the anaerobic induction
HrMADS47	ARE	AAACCA	6	-	Zea mays	cis-acting regulatory element essential for the anaerobic induction
HrMADS47	ARE	AAACCA	6	-	Zea mays	cis-acting regulatory element essential for the anaerobic induction
HrMADS47	ARE	AAACCA	6	-	Zea mays	cis-acting regulatory element essential for the anaerobic induction
HrMADS47	AT-rich element	ATAGAAATCAA	10	-	Glycine max	binding site of AT-rich DNA binding protein (ATBP-1)
HrMADS47	AT-rich sequence	TAAAATACT	9	-	Pisum sativum	element for maximal elicitor-mediated activation (2copies)
HrMADS47	Box 4	ATTAAT	6	+	Petroselinum crispum	part of a conserved DNA module involved in light responsiveness
HrMADS47	Box 4	ATTAAT	6	+	Petroselinum crispum	part of a conserved DNA module involved in light responsiveness
HrMADS47	Box 4	ATTAAT	6	-	Petroselinum crispum	part of a conserved DNA module involved in light responsiveness
HrMADS47	chs-CMA1a	TTACTTAA	8	+	Daucus carota	part of a light responsive element
HrMADS47	chs-CMA1a	TTACTTAA	8	-	Daucus carota	part of a light responsive element
HrMADS47	chs-CMA1a	TTACTTAA	8	+	Daucus carota	part of a light responsive element
HrMADS47	GA-motif	ATAGATAA	8	+	Arabidopsis thaliana	part of a light responsive element
HrMADS47	G-Box	CACGTG	6	-	Pisum sativum	cis-acting regulatory element involved in light responsiveness
HrMADS47	G-box	TACGTG	6	+	Arabidopsis thaliana	cis-acting regulatory element involved in light responsiveness
HrMADS47	G-box	CACGTG	6	-	Arabidopsis thaliana	cis-acting regulatory element involved in light responsiveness
HrMADS47	MBS	CAACTG	6	-	Arabidopsis thaliana	MYB binding site involved in drought-inducibility
HrMADS47	P-box	CCTTTTG	7	-	Oryza sativa	gibberellin-responsive element
HrMADS47	TCT-motif	TCTTAC	6	+	Arabidopsis thaliana	part of a light responsive element
HrMADS48	ABRE	CACGTG	6	+	Arabidopsis thaliana	cis-acting element involved in the abscisic acid responsiveness
HrMADS48	ABRE	ACGTG	5	+	Arabidopsis thaliana	cis-acting element involved in the abscisic acid responsiveness
HrMADS48	ACE	CTAACGTATT	9	+	Petroselinum crispum	cis-acting element involved in light responsiveness
HrMADS48	ACE	CTAACGTATT	9	+	Petroselinum crispum	cis-acting element involved in light responsiveness
HrMADS48	ARE	AAACCA	6	-	Zea mays	cis-acting regulatory element essential for the anaerobic induction
HrMADS48	AT-rich sequence	TAAAATACT	9	-	Pisum sativum	element for maximal elicitor-mediated activation (2copies)
HrMADS48	Box 4	ATTAAT	6	+	Petroselinum crispum	part of a conserved DNA module involved in light responsiveness
HrMADS48	Box 4	ATTAAT	6	+	Petroselinum crispum	part of a conserved DNA module involved in light responsiveness
HrMADS48	Box 4	ATTAAT	6	+	Petroselinum crispum	part of a conserved DNA module involved in light responsiveness
HrMADS48	Box 4	ATTAAT	6	-	Petroselinum crispum	part of a conserved DNA module involved in light responsiveness
HrMADS48	Box 4	ATTAAT	6	-	Petroselinum crispum	part of a conserved DNA module involved in light responsiveness
HrMADS48	Box 4	ATTAAT	6	-	Petroselinum crispum	part of a conserved DNA module involved in light responsiveness
HrMADS48	CGTCA-motif	CGTCA	5	-	Hordeum vulgare	cis-acting regulatory element involved in the MeJA-responsiveness
HrMADS48	circadian	CAAAGATATC	9	-	Lycopersicon esculentum	cis-acting regulatory element involved in circadian control
HrMADS48	GA-motif	ATAGATAA	8	-	Arabidopsis thaliana	part of a light responsive element
HrMADS48	GATA-motif	GATAGGA	7	-	Arabidopsis thaliana	part of a light responsive element
HrMADS48	G-Box	CACGTG	6	+	Pisum sativum	cis-acting regulatory element involved in light responsiveness
HrMADS48	G-box	CACGTG	6	+	Arabidopsis thaliana	cis-acting regulatory element involved in light responsiveness
HrMADS48	GT1-motif	GGTTAA	6	-	Arabidopsis thaliana	light responsive element
HrMADS48	GT1-motif	GGTTAAT	7	+	Avena sativa	light responsive element
HrMADS48	LTR	CCGAAA	6	+	Hordeum vulgare	cis-acting element involved in low-temperature responsiveness
HrMADS48	LTR	CCGAAA	6	-	Hordeum vulgare	cis-acting element involved in low-temperature responsiveness
HrMADS48	MBS	CAACTG	6	+	Arabidopsis thaliana	MYB binding site involved in drought-inducibility
HrMADS48	MRE	AACCTAA	7	-	Petroselinum crispum	MYB binding site involved in light responsiveness
HrMADS48	MRE	AACCTAA	7	+	Petroselinum crispum	MYB binding site involved in light responsiveness
HrMADS48	MRE	AACCTAA	7	-	Petroselinum crispum	MYB binding site involved in light responsiveness
HrMADS48	P-box	CCTTTTG	7	+	Oryza sativa	gibberellin-responsive element
HrMADS48	TCA-element	CCATCTTTTT	9	+	Nicotiana tabacum	cis-acting element involved in salicylic acid responsiveness
HrMADS48	TCA-element	CCATCTTTTT	9	+	Nicotiana tabacum	cis-acting element involved in salicylic acid responsiveness
HrMADS48	TGACG-motif	TGACG	5	+	Hordeum vulgare	cis-acting regulatory element involved in the MeJA-responsiveness
HrMADS48	WUN-motif	AAATTTCCT	9	+	Brassica oleracea	wound-responsive element
HrMADS49	4cl-CMA1c	CTTTACCAACCCCC	13	+	Petroselinum crispum	light responsive element
HrMADS49	AE-box	AGAAACTT	8	+	Arabidopsis thaliana	part of a module for light response
HrMADS49	ARE	AAACCA	6	-	Zea mays	cis-acting regulatory element essential for the anaerobic induction
HrMADS49	ARE	AAACCA	6	+	Zea mays	cis-acting regulatory element essential for the anaerobic induction
HrMADS49	Box II	TGGTAATAA	9	+	Solanum tuberosum	part of a light responsive element
HrMADS49	CAT-box	GCCACT	6	+	Arabidopsis thaliana	cis-acting regulatory element related to meristem expression
HrMADS49	CAT-box	GCCACT	6	-	Arabidopsis thaliana	cis-acting regulatory element related to meristem expression
HrMADS49	CGTCA-motif	CGTCA	5	+	Hordeum vulgare	cis-acting regulatory element involved in the MeJA-responsiveness
HrMADS49	GARE-motif	TCTGTTG	7	-	Brassica oleracea	gibberellin-responsive element
HrMADS49	GATA-motif	GATAGGG	7	+	Pisum sativum	part of a light responsive element
HrMADS49	GT1-motif	GGTTAA	6	+	Arabidopsis thaliana	light responsive element
HrMADS49	GT1-motif	GTGTGTGAA	9	+	Solanum tuberosum	light responsive element
HrMADS49	I-box	atGATAAGGTC	10	-	Helianthus annuus	part of a light responsive element
HrMADS49	P-box	CCTTTTG	7	-	Oryza sativa	gibberellin-responsive element
HrMADS49	TCA-element	TCAGAAGAGG	9	-	Brassica oleracea	cis-acting element involved in salicylic acid responsiveness
HrMADS49	TCA-element	CCATCTTTTT	9	+	Nicotiana tabacum	cis-acting element involved in salicylic acid responsiveness
HrMADS49	TCCC-motif	TCTCCCT	7	+	Spinacia oleracea	part of a light responsive element
HrMADS49	TGACG-motif	TGACG	5	-	Hordeum vulgare	cis-acting regulatory element involved in the MeJA-responsiveness
HrMADS49	TGA-element	AACGAC	6	+	Brassica oleracea	auxin-responsive element
HrMADS5	ABRE	ACGTG	5	-	Arabidopsis thaliana	cis-acting element involved in the abscisic acid responsiveness
HrMADS5	ABRE	ACGTG	5	-	Arabidopsis thaliana	cis-acting element involved in the abscisic acid responsiveness
HrMADS5	AE-box	AGAAACAA	8	-	Arabidopsis thaliana	part of a module for light response
HrMADS5	ARE	AAACCA	6	+	Zea mays	cis-acting regulatory element essential for the anaerobic induction
HrMADS5	ARE	AAACCA	6	-	Zea mays	cis-acting regulatory element essential for the anaerobic induction
HrMADS5	ARE	AAACCA	6	-	Zea mays	cis-acting regulatory element essential for the anaerobic induction
HrMADS5	ARE	AAACCA	6	+	Zea mays	cis-acting regulatory element essential for the anaerobic induction
HrMADS5	AT-rich element	ATAGAAATCAA	10	+	Glycine max	binding site of AT-rich DNA binding protein (ATBP-1)
HrMADS5	Box 4	ATTAAT	6	+	Petroselinum crispum	part of a conserved DNA module involved in light responsiveness
HrMADS5	Box 4	ATTAAT	6	+	Petroselinum crispum	part of a conserved DNA module involved in light responsiveness
HrMADS5	Box 4	ATTAAT	6	+	Petroselinum crispum	part of a conserved DNA module involved in light responsiveness
HrMADS5	Box 4	ATTAAT	6	-	Petroselinum crispum	part of a conserved DNA module involved in light responsiveness
HrMADS5	Box 4	ATTAAT	6	-	Petroselinum crispum	part of a conserved DNA module involved in light responsiveness
HrMADS5	Box 4	ATTAAT	6	-	Petroselinum crispum	part of a conserved DNA module involved in light responsiveness
HrMADS5	Box 4	ATTAAT	6	-	Petroselinum crispum	part of a conserved DNA module involved in light responsiveness
HrMADS5	Box 4	ATTAAT	6	-	Petroselinum crispum	part of a conserved DNA module involved in light responsiveness
HrMADS5	Box 4	ATTAAT	6	-	Petroselinum crispum	part of a conserved DNA module involved in light responsiveness
HrMADS5	Box 4	ATTAAT	6	-	Petroselinum crispum	part of a conserved DNA module involved in light responsiveness
HrMADS5	Box 4	ATTAAT	6	-	Petroselinum crispum	part of a conserved DNA module involved in light responsiveness
HrMADS5	Box 4	ATTAAT	6	-	Petroselinum crispum	part of a conserved DNA module involved in light responsiveness
HrMADS5	CGTCA-motif	CGTCA	5	-	Hordeum vulgare	cis-acting regulatory element involved in the MeJA-responsiveness
HrMADS5	Gap-box	CAAATGAA(A/G)A	9.5	-	Arabidopsis thaliana	part of a light responsive element
HrMADS5	GARE-motif	TCTGTTG	7	+	Brassica oleracea	gibberellin-responsive element
HrMADS5	GATA-motif	AAGATAAGATT	10	-	Arabidopsis thaliana	part of a light responsive element
HrMADS5	GATA-motif	AAGGATAAGG	9	-	Solanum tuberosum	part of a light responsive element
HrMADS5	G-box	TACGTG	6	-	Arabidopsis thaliana	cis-acting regulatory element involved in light responsiveness
HrMADS5	G-box	TACGTG	6	-	Arabidopsis thaliana	cis-acting regulatory element involved in light responsiveness
HrMADS5	GT1-motif	GGTTAA	6	-	Arabidopsis thaliana	light responsive element
HrMADS5	GT1-motif	GGTTAAT	7	+	Avena sativa	light responsive element
HrMADS5	LAMP-element	CTTTATCA	8	-	Pisum sativum	part of a light responsive element
HrMADS5	LTR	CCGAAA	6	+	Hordeum vulgare	cis-acting element involved in low-temperature responsiveness
HrMADS5	LTR	CCGAAA	6	+	Hordeum vulgare	cis-acting element involved in low-temperature responsiveness
HrMADS5	O2-site	GATGACATGG	9	-	Zea mays	cis-acting regulatory element involved in zein metabolism regulation
HrMADS5	TGACG-motif	TGACG	5	+	Hordeum vulgare	cis-acting regulatory element involved in the MeJA-responsiveness
HrMADS50	A-box	CCGTCC	6	-	Petroselinum crispum	cis-acting regulatory element
HrMADS50	ABRE	TACGGTC	7	-	Arabidopsis thaliana	cis-acting element involved in the abscisic acid responsiveness
HrMADS50	ARE	AAACCA	6	+	Zea mays	cis-acting regulatory element essential for the anaerobic induction
HrMADS50	ARE	AAACCA	6	-	Zea mays	cis-acting regulatory element essential for the anaerobic induction
HrMADS50	ATCT-motif	AATCTAATCC	9	+	Pisum sativum	part of a conserved DNA module involved in light responsiveness
HrMADS50	ATCT-motif	AATCTAATCC	9	-	Pisum sativum	part of a conserved DNA module involved in light responsiveness
HrMADS50	Box 4	ATTAAT	6	+	Petroselinum crispum	part of a conserved DNA module involved in light responsiveness
HrMADS50	Box 4	ATTAAT	6	+	Petroselinum crispum	part of a conserved DNA module involved in light responsiveness
HrMADS50	Box 4	ATTAAT	6	-	Petroselinum crispum	part of a conserved DNA module involved in light responsiveness
HrMADS50	Box 4	ATTAAT	6	-	Petroselinum crispum	part of a conserved DNA module involved in light responsiveness
HrMADS50	Box 4	ATTAAT	6	-	Petroselinum crispum	part of a conserved DNA module involved in light responsiveness
HrMADS50	Box 4	ATTAAT	6	-	Petroselinum crispum	part of a conserved DNA module involved in light responsiveness
HrMADS50	chs-CMA1a	TTACTTAA	8	-	Daucus carota	part of a light responsive element
HrMADS50	chs-CMA1a	TTACTTAA	8	-	Daucus carota	part of a light responsive element
HrMADS50	G-box	CACGAC	6	-	Zea mays	cis-acting regulatory element involved in light responsiveness
HrMADS50	GT1-motif	GGTTAAT	7	+	Avena sativa	light responsive element
HrMADS50	I-box	cCATATCCAAT	10	-	Flaveria trinervia	part of a light responsive element
HrMADS50	MRE	AACCTAA	7	+	Petroselinum crispum	MYB binding site involved in light responsiveness
HrMADS50	P-box	CCTTTTG	7	-	Oryza sativa	gibberellin-responsive element
HrMADS50	TCA-element	CCATCTTTTT	9	+	Nicotiana tabacum	cis-acting element involved in salicylic acid responsiveness
HrMADS50	TC-rich repeats	ATTCTCTAAC	9	-	Nicotiana tabacum	cis-acting element involved in defense and stress responsiveness
HrMADS51	ABRE	ACGTG	5	+	Arabidopsis thaliana	cis-acting element involved in the abscisic acid responsiveness
HrMADS51	ARE	AAACCA	6	-	Zea mays	cis-acting regulatory element essential for the anaerobic induction
HrMADS51	ARE	AAACCA	6	-	Zea mays	cis-acting regulatory element essential for the anaerobic induction
HrMADS51	ARE	AAACCA	6	-	Zea mays	cis-acting regulatory element essential for the anaerobic induction
HrMADS51	ATCT-motif	AATCTAATCC	9	+	Pisum sativum	part of a conserved DNA module involved in light responsiveness
HrMADS51	ATCT-motif	AATCTAATCC	9	+	Pisum sativum	part of a conserved DNA module involved in light responsiveness
HrMADS51	AT-rich element	ATAGAAATCAA	10	-	Glycine max	binding site of AT-rich DNA binding protein (ATBP-1)
HrMADS51	Box 4	ATTAAT	6	+	Petroselinum crispum	part of a conserved DNA module involved in light responsiveness
HrMADS51	Box 4	ATTAAT	6	-	Petroselinum crispum	part of a conserved DNA module involved in light responsiveness
HrMADS51	Box 4	ATTAAT	6	-	Petroselinum crispum	part of a conserved DNA module involved in light responsiveness
HrMADS51	Box 4	ATTAAT	6	-	Petroselinum crispum	part of a conserved DNA module involved in light responsiveness
HrMADS51	Box 4	ATTAAT	6	-	Petroselinum crispum	part of a conserved DNA module involved in light responsiveness
HrMADS51	CGTCA-motif	CGTCA	5	+	Hordeum vulgare	cis-acting regulatory element involved in the MeJA-responsiveness
HrMADS51	GARE-motif	TCTGTTG	7	-	Brassica oleracea	gibberellin-responsive element
HrMADS51	G-Box	CACGTT	6	-	Pisum sativum	cis-acting regulatory element involved in light responsiveness
HrMADS51	LTR	CCGAAA	6	+	Hordeum vulgare	cis-acting element involved in low-temperature responsiveness
HrMADS51	LTR	CCGAAA	6	+	Hordeum vulgare	cis-acting element involved in low-temperature responsiveness
HrMADS51	P-box	CCTTTTG	7	+	Oryza sativa	gibberellin-responsive element
HrMADS51	TCA-element	CCATCTTTTT	9	+	Nicotiana tabacum	cis-acting element involved in salicylic acid responsiveness
HrMADS51	TCCC-motif	TCTCCCT	7	-	Spinacia oleracea	part of a light responsive element
HrMADS51	TC-rich repeats	GTTTTCTTAC	9	+	Nicotiana tabacum	cis-acting element involved in defense and stress responsiveness
HrMADS51	TCT-motif	TCTTAC	6	+	Arabidopsis thaliana	part of a light responsive element
HrMADS51	TGACG-motif	TGACG	5	-	Hordeum vulgare	cis-acting regulatory element involved in the MeJA-responsiveness
HrMADS51	TGA-element	AACGAC	6	-	Brassica oleracea	auxin-responsive element
HrMADS52	ABRE	ACGTG	5	+	Arabidopsis thaliana	cis-acting element involved in the abscisic acid responsiveness
HrMADS52	ABRE	ACGTG	5	-	Arabidopsis thaliana	cis-acting element involved in the abscisic acid responsiveness
HrMADS52	ACE	CTAACGTATT	9	-	Petroselinum crispum	cis-acting element involved in light responsiveness
HrMADS52	ARE	AAACCA	6	+	Zea mays	cis-acting regulatory element essential for the anaerobic induction
HrMADS52	ARE	AAACCA	6	-	Zea mays	cis-acting regulatory element essential for the anaerobic induction
HrMADS52	ARE	AAACCA	6	+	Zea mays	cis-acting regulatory element essential for the anaerobic induction
HrMADS52	AT1-motif	AATTATTTTTTATT	13	+	Solanum tuberosum	part of a light responsive module
HrMADS52	ATCT-motif	AATCTAATCC	9	-	Pisum sativum	part of a conserved DNA module involved in light responsiveness
HrMADS52	AuxRE	TGTCTCAATAAG	11	-	Glycine max	part of an auxin-responsive element
HrMADS52	Box 4	ATTAAT	6	+	Petroselinum crispum	part of a conserved DNA module involved in light responsiveness
HrMADS52	Box 4	ATTAAT	6	+	Petroselinum crispum	part of a conserved DNA module involved in light responsiveness
HrMADS52	Box 4	ATTAAT	6	+	Petroselinum crispum	part of a conserved DNA module involved in light responsiveness
HrMADS52	Box 4	ATTAAT	6	+	Petroselinum crispum	part of a conserved DNA module involved in light responsiveness
HrMADS52	Box 4	ATTAAT	6	+	Petroselinum crispum	part of a conserved DNA module involved in light responsiveness
HrMADS52	Box 4	ATTAAT	6	-	Petroselinum crispum	part of a conserved DNA module involved in light responsiveness
HrMADS52	Box 4	ATTAAT	6	-	Petroselinum crispum	part of a conserved DNA module involved in light responsiveness
HrMADS52	Box 4	ATTAAT	6	-	Petroselinum crispum	part of a conserved DNA module involved in light responsiveness
HrMADS52	CAT-box	GCCACT	6	+	Arabidopsis thaliana	cis-acting regulatory element related to meristem expression
HrMADS52	CGTCA-motif	CGTCA	5	+	Hordeum vulgare	cis-acting regulatory element involved in the MeJA-responsiveness
HrMADS52	circadian	CAAAGATATC	9	+	Lycopersicon esculentum	cis-acting regulatory element involved in circadian control
HrMADS52	GATA-motif	GATAGGA	7	-	Arabidopsis thaliana	part of a light responsive element
HrMADS52	G-box	CCACGTAA	8	-	Brassica napus	cis-acting regulatory element involved in light responsiveness
HrMADS52	G-box	TACGTG	6	+	Arabidopsis thaliana	cis-acting regulatory element involved in light responsiveness
HrMADS52	G-box	CACGTC	6	+	Zea mays	cis-acting regulatory element involved in light responsiveness
HrMADS52	GT1-motif	GGTTAA	6	+	Arabidopsis thaliana	light responsive element
HrMADS52	GT1-motif	GGTTAA	6	+	Arabidopsis thaliana	light responsive element
HrMADS52	MBS	CAACTG	6	-	Arabidopsis thaliana	MYB binding site involved in drought-inducibility
HrMADS52	P-box	CCTTTTG	7	+	Oryza sativa	gibberellin-responsive element
HrMADS52	TCA-element	TCAGAAGAGG	9	+	Brassica oleracea	cis-acting element involved in salicylic acid responsiveness
HrMADS52	TCA-element	CCATCTTTTT	9	+	Nicotiana tabacum	cis-acting element involved in salicylic acid responsiveness
HrMADS52	TCT-motif	TCTTAC	6	-	Arabidopsis thaliana	part of a light responsive element
HrMADS52	TGACG-motif	TGACG	5	-	Hordeum vulgare	cis-acting regulatory element involved in the MeJA-responsiveness
HrMADS53	ABRE	ACGTG	5	-	Arabidopsis thaliana	cis-acting element involved in the abscisic acid responsiveness
HrMADS53	ABRE	CACGTG	6	-	Arabidopsis thaliana	cis-acting element involved in the abscisic acid responsiveness
HrMADS53	ABRE	ACGTG	5	+	Arabidopsis thaliana	cis-acting element involved in the abscisic acid responsiveness
HrMADS53	AE-box	AGAAACTT	8	-	Arabidopsis thaliana	part of a module for light response
HrMADS53	ARE	AAACCA	6	-	Zea mays	cis-acting regulatory element essential for the anaerobic induction
HrMADS53	ARE	AAACCA	6	-	Zea mays	cis-acting regulatory element essential for the anaerobic induction
HrMADS53	AT1-motif	AATTATTTTTTATT	13	-	Solanum tuberosum	part of a light responsive module
HrMADS53	Box 4	ATTAAT	6	+	Petroselinum crispum	part of a conserved DNA module involved in light responsiveness
HrMADS53	Box 4	ATTAAT	6	+	Petroselinum crispum	part of a conserved DNA module involved in light responsiveness
HrMADS53	Box 4	ATTAAT	6	-	Petroselinum crispum	part of a conserved DNA module involved in light responsiveness
HrMADS53	Box 4	ATTAAT	6	-	Petroselinum crispum	part of a conserved DNA module involved in light responsiveness
HrMADS53	Box 4	ATTAAT	6	-	Petroselinum crispum	part of a conserved DNA module involved in light responsiveness
HrMADS53	Box 4	ATTAAT	6	-	Petroselinum crispum	part of a conserved DNA module involved in light responsiveness
HrMADS53	chs-CMA1a	TTACTTAA	8	-	Daucus carota	part of a light responsive element
HrMADS53	G-Box	CACGTG	6	-	Pisum sativum	cis-acting regulatory element involved in light responsiveness
HrMADS53	G-box	TAACACGTAG	9	-	Brassica oleracea	cis-acting regulatory element involved in light responsiveness
HrMADS53	G-box	TACGTG	6	-	Arabidopsis thaliana	cis-acting regulatory element involved in light responsiveness
HrMADS53	G-box	CACGTG	6	-	Arabidopsis thaliana	cis-acting regulatory element involved in light responsiveness
HrMADS53	GC-motif	CCCCCG	6	+	Zea mays	enhancer-like element involved in anoxic specific inducibility
HrMADS53	MRE	AACCTAA	7	+	Petroselinum crispum	MYB binding site involved in light responsiveness
HrMADS53	Sp1	GGGCGG	6	-	Oryza sativa	light responsive element
HrMADS53	TCT-motif	TCTTAC	6	+	Arabidopsis thaliana	part of a light responsive element
HrMADS54	ABRE	CACGTG	6	-	Arabidopsis thaliana	cis-acting element involved in the abscisic acid responsiveness
HrMADS54	ABRE	ACGTG	5	+	Arabidopsis thaliana	cis-acting element involved in the abscisic acid responsiveness
HrMADS54	ABRE	TACGGTC	7	+	Arabidopsis thaliana	cis-acting element involved in the abscisic acid responsiveness
HrMADS54	ABRE	ACGTG	5	+	Arabidopsis thaliana	cis-acting element involved in the abscisic acid responsiveness
HrMADS54	ACE	GACACGTATG	9	-	Petroselinum crispum	cis-acting element involved in light responsiveness
HrMADS54	AE-box	AGAAACTT	8	-	Arabidopsis thaliana	part of a module for light response
HrMADS54	AT1-motif	AATTATTTTTTATT	13	-	Solanum tuberosum	part of a light responsive module
HrMADS54	Box 4	ATTAAT	6	+	Petroselinum crispum	part of a conserved DNA module involved in light responsiveness
HrMADS54	Box 4	ATTAAT	6	+	Petroselinum crispum	part of a conserved DNA module involved in light responsiveness
HrMADS54	Box 4	ATTAAT	6	-	Petroselinum crispum	part of a conserved DNA module involved in light responsiveness
HrMADS54	GATA-motif	GATAGGG	7	-	Pisum sativum	part of a light responsive element
HrMADS54	G-Box	CACGTG	6	-	Pisum sativum	cis-acting regulatory element involved in light responsiveness
HrMADS54	G-box	CACGAC	6	+	Zea mays	cis-acting regulatory element involved in light responsiveness
HrMADS54	G-box	CACGTG	6	-	Arabidopsis thaliana	cis-acting regulatory element involved in light responsiveness
HrMADS54	G-box	CAGACGTGGCA	10	+	Nicotiana plumbaginifolia	cis-acting regulatory element involved in light responsiveness
HrMADS54	G-box	TACGTG	6	+	Arabidopsis thaliana	cis-acting regulatory element involved in light responsiveness
HrMADS54	GT1-motif	GGTTAA	6	+	Arabidopsis thaliana	light responsive element
HrMADS54	GT1-motif	GGTTAA	6	+	Arabidopsis thaliana	light responsive element
HrMADS54	GT1-motif	GGTTAA	6	-	Arabidopsis thaliana	light responsive element
HrMADS54	MBSI	aaaAaaC(G/C)GTTA	10.5	-	Petunia hybrida	MYB binding site involved in flavonoid biosynthetic genes regulation
HrMADS54	TC-rich repeats	GTTTTCTTAC	9	-	Nicotiana tabacum	cis-acting element involved in defense and stress responsiveness
HrMADS54	TCT-motif	TCTTAC	6	+	Arabidopsis thaliana	part of a light responsive element
HrMADS55	ARE	AAACCA	6	+	Zea mays	cis-acting regulatory element essential for the anaerobic induction
HrMADS55	ARE	AAACCA	6	-	Zea mays	cis-acting regulatory element essential for the anaerobic induction
HrMADS55	ARE	AAACCA	6	-	Zea mays	cis-acting regulatory element essential for the anaerobic induction
HrMADS55	ARE	AAACCA	6	+	Zea mays	cis-acting regulatory element essential for the anaerobic induction
HrMADS55	AT-rich sequence	TAAAATACT	9	-	Pisum sativum	element for maximal elicitor-mediated activation (2copies)
HrMADS55	Box 4	ATTAAT	6	+	Petroselinum crispum	part of a conserved DNA module involved in light responsiveness
HrMADS55	Box 4	ATTAAT	6	-	Petroselinum crispum	part of a conserved DNA module involved in light responsiveness
HrMADS55	Box 4	ATTAAT	6	-	Petroselinum crispum	part of a conserved DNA module involved in light responsiveness
HrMADS55	chs-CMA1a	TTACTTAA	8	+	Daucus carota	part of a light responsive element
HrMADS55	GATA-motif	AAGATAAGATT	10	+	Arabidopsis thaliana	part of a light responsive element
HrMADS55	G-box	TAACACGTAG	9	+	Brassica oleracea	cis-acting regulatory element involved in light responsiveness
HrMADS55	GT1-motif	GGTTAA	6	-	Arabidopsis thaliana	light responsive element
HrMADS55	GT1-motif	GGTTAAT	7	+	Avena sativa	light responsive element
HrMADS55	I-box	AGATAAGG	8	-	Triticum aestivum	part of a light responsive element
HrMADS55	LTR	CCGAAA	6	+	Hordeum vulgare	cis-acting element involved in low-temperature responsiveness
HrMADS55	MBS	CAACTG	6	-	Arabidopsis thaliana	MYB binding site involved in drought-inducibility
HrMADS55	MRE	AACCTAA	7	-	Petroselinum crispum	MYB binding site involved in light responsiveness
HrMADS55	MRE	AACCTAA	7	+	Petroselinum crispum	MYB binding site involved in light responsiveness
HrMADS55	TC-rich repeats	ATTCTCTAAC	9	-	Nicotiana tabacum	cis-acting element involved in defense and stress responsiveness
HrMADS55	TCT-motif	TCTTAC	6	-	Arabidopsis thaliana	part of a light responsive element
HrMADS56	ABRE	ACGTG	5	+	Arabidopsis thaliana	cis-acting element involved in the abscisic acid responsiveness
HrMADS56	AE-box	AGAAACTT	8	+	Arabidopsis thaliana	part of a module for light response
HrMADS56	ARE	AAACCA	6	+	Zea mays	cis-acting regulatory element essential for the anaerobic induction
HrMADS56	AT1-motif	AATTATTTTTTATT	13	+	Solanum tuberosum	part of a light responsive module
HrMADS56	AT-rich element	ATAGAAATCAA	10	-	Glycine max	binding site of AT-rich DNA binding protein (ATBP-1)
HrMADS56	Box 4	ATTAAT	6	+	Petroselinum crispum	part of a conserved DNA module involved in light responsiveness
HrMADS56	Box 4	ATTAAT	6	+	Petroselinum crispum	part of a conserved DNA module involved in light responsiveness
HrMADS56	Box 4	ATTAAT	6	+	Petroselinum crispum	part of a conserved DNA module involved in light responsiveness
HrMADS56	Box 4	ATTAAT	6	-	Petroselinum crispum	part of a conserved DNA module involved in light responsiveness
HrMADS56	Box 4	ATTAAT	6	-	Petroselinum crispum	part of a conserved DNA module involved in light responsiveness
HrMADS56	Box 4	ATTAAT	6	-	Petroselinum crispum	part of a conserved DNA module involved in light responsiveness
HrMADS56	Box 4	ATTAAT	6	-	Petroselinum crispum	part of a conserved DNA module involved in light responsiveness
HrMADS56	CGTCA-motif	CGTCA	5	-	Hordeum vulgare	cis-acting regulatory element involved in the MeJA-responsiveness
HrMADS56	circadian	CAAAGATATC	9	+	Lycopersicon esculentum	cis-acting regulatory element involved in circadian control
HrMADS56	G-Box	CACGTT	6	-	Pisum sativum	cis-acting regulatory element involved in light responsiveness
HrMADS56	MRE	AACCTAA	7	+	Petroselinum crispum	MYB binding site involved in light responsiveness
HrMADS56	TCT-motif	TCTTAC	6	+	Arabidopsis thaliana	part of a light responsive element
HrMADS56	TGACG-motif	TGACG	5	+	Hordeum vulgare	cis-acting regulatory element involved in the MeJA-responsiveness
HrMADS57	AACA_motif	TAACAAACTCCA	11	-	Oryza sativa	involved in endosperm-specific negative expression
HrMADS57	ABRE	ACGTG	5	+	Arabidopsis thaliana	cis-acting element involved in the abscisic acid responsiveness
HrMADS57	AE-box	AGAAACTT	8	-	Arabidopsis thaliana	part of a module for light response
HrMADS57	AE-box	AGAAACAA	8	-	Arabidopsis thaliana	part of a module for light response
HrMADS57	ARE	AAACCA	6	-	Zea mays	cis-acting regulatory element essential for the anaerobic induction
HrMADS57	ARE	AAACCA	6	-	Zea mays	cis-acting regulatory element essential for the anaerobic induction
HrMADS57	ARE	AAACCA	6	+	Zea mays	cis-acting regulatory element essential for the anaerobic induction
HrMADS57	AT1-motif	AATTATTTTTTATT	13	+	Solanum tuberosum	part of a light responsive module
HrMADS57	AT-rich element	ATAGAAATCAA	10	-	Glycine max	binding site of AT-rich DNA binding protein (ATBP-1)
HrMADS57	Box 4	ATTAAT	6	+	Petroselinum crispum	part of a conserved DNA module involved in light responsiveness
HrMADS57	Box 4	ATTAAT	6	+	Petroselinum crispum	part of a conserved DNA module involved in light responsiveness
HrMADS57	Box 4	ATTAAT	6	+	Petroselinum crispum	part of a conserved DNA module involved in light responsiveness
HrMADS57	Box 4	ATTAAT	6	+	Petroselinum crispum	part of a conserved DNA module involved in light responsiveness
HrMADS57	Box 4	ATTAAT	6	-	Petroselinum crispum	part of a conserved DNA module involved in light responsiveness
HrMADS57	Box 4	ATTAAT	6	-	Petroselinum crispum	part of a conserved DNA module involved in light responsiveness
HrMADS57	Box 4	ATTAAT	6	-	Petroselinum crispum	part of a conserved DNA module involved in light responsiveness
HrMADS57	Box II	TGGTAATAA	9	-	Solanum tuberosum	part of a light responsive element
HrMADS57	CAT-box	GCCACT	6	+	Arabidopsis thaliana	cis-acting regulatory element related to meristem expression
HrMADS57	GA-motif	ATAGATAA	8	-	Arabidopsis thaliana	part of a light responsive element
HrMADS57	G-box	TACGTG	6	+	Arabidopsis thaliana	cis-acting regulatory element involved in light responsiveness
HrMADS57	LAMP-element	CTTTATCA	8	+	Pisum sativum	part of a light responsive element
HrMADS57	LS7	CAGATTTATTTTTA	13	-	Zea mays	part of a light responsive element
HrMADS57	O2-site	GATGA(C/T)(A/G)TG(A/G)	8	-	Zea mays	cis-acting regulatory element involved in zein metabolism regulation
HrMADS57	TCA-element	CCATCTTTTT	9	+	Nicotiana tabacum	cis-acting element involved in salicylic acid responsiveness
HrMADS57	TCA-element	CCATCTTTTT	9	+	Nicotiana tabacum	cis-acting element involved in salicylic acid responsiveness
HrMADS57	TC-rich repeats	ATTCTCTAAC	9	-	Nicotiana tabacum	cis-acting element involved in defense and stress responsiveness
HrMADS58	ABRE	ACGTG	5	-	Arabidopsis thaliana	cis-acting element involved in the abscisic acid responsiveness
HrMADS58	ABRE	ACGTG	5	+	Arabidopsis thaliana	cis-acting element involved in the abscisic acid responsiveness
HrMADS58	ABRE	ACGTG	5	-	Arabidopsis thaliana	cis-acting element involved in the abscisic acid responsiveness
HrMADS58	AE-box	AGAAACAA	8	-	Arabidopsis thaliana	part of a module for light response
HrMADS58	ARE	AAACCA	6	+	Zea mays	cis-acting regulatory element essential for the anaerobic induction
HrMADS58	AT-rich element	ATAGAAATCAA	10	+	Glycine max	binding site of AT-rich DNA binding protein (ATBP-1)
HrMADS58	Box 4	ATTAAT	6	-	Petroselinum crispum	part of a conserved DNA module involved in light responsiveness
HrMADS58	Box 4	ATTAAT	6	-	Petroselinum crispum	part of a conserved DNA module involved in light responsiveness
HrMADS58	Box II	ACACGTAGA	9	+	Arabidopsis thaliana	part of a light responsive element
HrMADS58	CCAAT-box	CAACGG	6	-	Hordeum vulgare	MYBHv1 binding site
HrMADS58	circadian	CAAAGATATC	9	+	Lycopersicon esculentum	cis-acting regulatory element involved in circadian control
HrMADS58	circadian	CAAAGATATC	9	-	Lycopersicon esculentum	cis-acting regulatory element involved in circadian control
HrMADS58	circadian	CAAAGATATC	9	+	Lycopersicon esculentum	cis-acting regulatory element involved in circadian control
HrMADS58	GA-motif	ATAGATAA	8	-	Arabidopsis thaliana	part of a light responsive element
HrMADS58	G-Box	CACGTT	6	-	Pisum sativum	cis-acting regulatory element involved in light responsiveness
HrMADS58	G-box	TACGTG	6	-	Arabidopsis thaliana	cis-acting regulatory element involved in light responsiveness
HrMADS58	G-box	TAACACGTAG	9	+	Brassica oleracea	cis-acting regulatory element involved in light responsiveness
HrMADS58	G-box	TACGTG	6	-	Arabidopsis thaliana	cis-acting regulatory element involved in light responsiveness
HrMADS58	GT1-motif	GGTTAA	6	+	Arabidopsis thaliana	light responsive element
HrMADS58	GT1-motif	GGTTAA	6	-	Arabidopsis thaliana	light responsive element
HrMADS58	GT1-motif	GGTTAA	6	-	Arabidopsis thaliana	light responsive element
HrMADS58	GT1-motif	GGTTAAT	7	-	Avena sativa	light responsive element
HrMADS58	GT1-motif	GGTTAA	6	-	Arabidopsis thaliana	light responsive element
HrMADS58	LTR	CCGAAA	6	+	Hordeum vulgare	cis-acting element involved in low-temperature responsiveness
HrMADS58	P-box	CCTTTTG	7	-	Oryza sativa	gibberellin-responsive element
HrMADS59	ABRE	ACGTG	5	-	Arabidopsis thaliana	cis-acting element involved in the abscisic acid responsiveness
HrMADS59	ABRE	ACGTG	5	+	Arabidopsis thaliana	cis-acting element involved in the abscisic acid responsiveness
HrMADS59	ABRE	CACGTG	6	-	Arabidopsis thaliana	cis-acting element involved in the abscisic acid responsiveness
HrMADS59	ABRE	ACGTG	5	+	Arabidopsis thaliana	cis-acting element involved in the abscisic acid responsiveness
HrMADS59	ACA-motif	AATCACAACCATA	12	+	Arabidopsis thaliana	part of gapA in (gapA-CMA1) involved with light responsiveness
HrMADS59	ARE	AAACCA	6	+	Zea mays	cis-acting regulatory element essential for the anaerobic induction
HrMADS59	Box 4	ATTAAT	6	+	Petroselinum crispum	part of a conserved DNA module involved in light responsiveness
HrMADS59	Box 4	ATTAAT	6	+	Petroselinum crispum	part of a conserved DNA module involved in light responsiveness
HrMADS59	Box 4	ATTAAT	6	+	Petroselinum crispum	part of a conserved DNA module involved in light responsiveness
HrMADS59	Box 4	ATTAAT	6	-	Petroselinum crispum	part of a conserved DNA module involved in light responsiveness
HrMADS59	Box 4	ATTAAT	6	-	Petroselinum crispum	part of a conserved DNA module involved in light responsiveness
HrMADS59	CAT-box	GCCACT	6	-	Arabidopsis thaliana	cis-acting regulatory element related to meristem expression
HrMADS59	CAT-box	GCCACT	6	+	Arabidopsis thaliana	cis-acting regulatory element related to meristem expression
HrMADS59	GA-motif	ATAGATAA	8	-	Arabidopsis thaliana	part of a light responsive element
HrMADS59	GARE-motif	TCTGTTG	7	+	Brassica oleracea	gibberellin-responsive element
HrMADS59	G-Box	CACGTT	6	-	Pisum sativum	cis-acting regulatory element involved in light responsiveness
HrMADS59	G-Box	CACGTG	6	-	Pisum sativum	cis-acting regulatory element involved in light responsiveness
HrMADS59	G-box	TACGTG	6	-	Arabidopsis thaliana	cis-acting regulatory element involved in light responsiveness
HrMADS59	G-box	TAAACGTG	8	+	Brassica oleracea	cis-acting regulatory element involved in light responsiveness
HrMADS59	G-box	ACACGTGT	8	-	Brassica napus	cis-acting regulatory element involved in light responsiveness
HrMADS59	G-box	CACGTG	6	-	Arabidopsis thaliana	cis-acting regulatory element involved in light responsiveness
HrMADS59	TC-rich repeats	ATTCTCTAAC	9	+	Nicotiana tabacum	cis-acting element involved in defense and stress responsiveness
HrMADS59	TGA-element	AACGAC	6	+	Brassica oleracea	auxin-responsive element
HrMADS6	ABRE	ACGTG	5	-	Arabidopsis thaliana	cis-acting element involved in the abscisic acid responsiveness
HrMADS6	ARE	AAACCA	6	+	Zea mays	cis-acting regulatory element essential for the anaerobic induction
HrMADS6	AT1-motif	AATTATTTTTTATT	13	-	Solanum tuberosum	part of a light responsive module
HrMADS6	Box 4	ATTAAT	6	+	Petroselinum crispum	part of a conserved DNA module involved in light responsiveness
HrMADS6	Box 4	ATTAAT	6	+	Petroselinum crispum	part of a conserved DNA module involved in light responsiveness
HrMADS6	Box 4	ATTAAT	6	+	Petroselinum crispum	part of a conserved DNA module involved in light responsiveness
HrMADS6	Box 4	ATTAAT	6	-	Petroselinum crispum	part of a conserved DNA module involved in light responsiveness
HrMADS6	Box 4	ATTAAT	6	-	Petroselinum crispum	part of a conserved DNA module involved in light responsiveness
HrMADS6	Box 4	ATTAAT	6	-	Petroselinum crispum	part of a conserved DNA module involved in light responsiveness
HrMADS6	GA-motif	ATAGATAA	8	+	Arabidopsis thaliana	part of a light responsive element
HrMADS6	GARE-motif	TCTGTTG	7	+	Brassica oleracea	gibberellin-responsive element
HrMADS6	GARE-motif	TCTGTTG	7	+	Brassica oleracea	gibberellin-responsive element
HrMADS6	G-box	TACGTG	6	-	Arabidopsis thaliana	cis-acting regulatory element involved in light responsiveness
HrMADS6	MBSI	aaaAaaC(G/C)GTTA	10.5	-	Petunia hybrida	MYB binding site involved in flavonoid biosynthetic genes regulation
HrMADS6	RY-element	CATGCATG	8	+	Helianthus annuus	cis-acting regulatory element involved in seed-specific regulation
HrMADS6	TC-rich repeats	ATTCTCTAAC	9	+	Nicotiana tabacum	cis-acting element involved in defense and stress responsiveness
HrMADS6	TC-rich repeats	ATTCTCTAAC	9	-	Nicotiana tabacum	cis-acting element involved in defense and stress responsiveness
HrMADS6	TCT-motif	TCTTAC	6	+	Arabidopsis thaliana	part of a light responsive element
HrMADS60	3-AF1 binding site	TAAGAGAGGAA	10	+	Solanum tuberosum	light responsive element
HrMADS60	AE-box	AGAAACTT	8	-	Arabidopsis thaliana	part of a module for light response
HrMADS60	ARE	AAACCA	6	-	Zea mays	cis-acting regulatory element essential for the anaerobic induction
HrMADS60	AT1-motif	AATTATTTTTTATT	13	+	Solanum tuberosum	part of a light responsive module
HrMADS60	Box 4	ATTAAT	6	+	Petroselinum crispum	part of a conserved DNA module involved in light responsiveness
HrMADS60	Box 4	ATTAAT	6	+	Petroselinum crispum	part of a conserved DNA module involved in light responsiveness
HrMADS60	Box 4	ATTAAT	6	+	Petroselinum crispum	part of a conserved DNA module involved in light responsiveness
HrMADS60	Box 4	ATTAAT	6	+	Petroselinum crispum	part of a conserved DNA module involved in light responsiveness
HrMADS60	Box 4	ATTAAT	6	+	Petroselinum crispum	part of a conserved DNA module involved in light responsiveness
HrMADS60	Box 4	ATTAAT	6	-	Petroselinum crispum	part of a conserved DNA module involved in light responsiveness
HrMADS60	Box 4	ATTAAT	6	-	Petroselinum crispum	part of a conserved DNA module involved in light responsiveness
HrMADS60	Box 4	ATTAAT	6	-	Petroselinum crispum	part of a conserved DNA module involved in light responsiveness
HrMADS60	Box 4	ATTAAT	6	-	Petroselinum crispum	part of a conserved DNA module involved in light responsiveness
HrMADS60	Box 4	ATTAAT	6	-	Petroselinum crispum	part of a conserved DNA module involved in light responsiveness
HrMADS60	TATC-box	TATCCCA	7	+	Oryza sativa	cis-acting element involved in gibberellin-responsiveness
HrMADS60	TCCC-motif	TCTCCCT	7	-	Spinacia oleracea	part of a light responsive element
HrMADS60	TCCC-motif	TCTCCCT	7	-	Spinacia oleracea	part of a light responsive element
HrMADS60	TCCC-motif	TCTCCCT	7	-	Spinacia oleracea	part of a light responsive element
HrMADS60	TCCC-motif	TCTCCCT	7	-	Spinacia oleracea	part of a light responsive element
HrMADS60	WUN-motif	AAATTTCCT	9	-	Brassica oleracea	wound-responsive element
HrMADS61	3-AF1 binding site	TAAGAGAGGAA	10	-	Solanum tuberosum	light responsive element
HrMADS61	ABRE	ACGTG	5	+	Arabidopsis thaliana	cis-acting element involved in the abscisic acid responsiveness
HrMADS61	ABRE	ACGTG	5	-	Arabidopsis thaliana	cis-acting element involved in the abscisic acid responsiveness
HrMADS61	ARE	AAACCA	6	+	Zea mays	cis-acting regulatory element essential for the anaerobic induction
HrMADS61	ARE	AAACCA	6	+	Zea mays	cis-acting regulatory element essential for the anaerobic induction
HrMADS61	Box 4	ATTAAT	6	+	Petroselinum crispum	part of a conserved DNA module involved in light responsiveness
HrMADS61	Box 4	ATTAAT	6	+	Petroselinum crispum	part of a conserved DNA module involved in light responsiveness
HrMADS61	Box 4	ATTAAT	6	+	Petroselinum crispum	part of a conserved DNA module involved in light responsiveness
HrMADS61	Box 4	ATTAAT	6	-	Petroselinum crispum	part of a conserved DNA module involved in light responsiveness
HrMADS61	Box 4	ATTAAT	6	-	Petroselinum crispum	part of a conserved DNA module involved in light responsiveness
HrMADS61	Box 4	ATTAAT	6	-	Petroselinum crispum	part of a conserved DNA module involved in light responsiveness
HrMADS61	Box 4	ATTAAT	6	-	Petroselinum crispum	part of a conserved DNA module involved in light responsiveness
HrMADS61	CAT-box	GCCACT	6	+	Arabidopsis thaliana	cis-acting regulatory element related to meristem expression
HrMADS61	CGTCA-motif	CGTCA	5	+	Hordeum vulgare	cis-acting regulatory element involved in the MeJA-responsiveness
HrMADS61	circadian	CAAAGATATC	9	-	Lycopersicon esculentum	cis-acting regulatory element involved in circadian control
HrMADS61	circadian	CAAAGATATC	9	+	Lycopersicon esculentum	cis-acting regulatory element involved in circadian control
HrMADS61	GARE-motif	TCTGTTG	7	-	Brassica oleracea	gibberellin-responsive element
HrMADS61	GATA-motif	AAGATAAGATT	10	+	Arabidopsis thaliana	part of a light responsive element
HrMADS61	G-Box	CACGTT	6	-	Pisum sativum	cis-acting regulatory element involved in light responsiveness
HrMADS61	G-Box	CACGTT	6	+	Pisum sativum	cis-acting regulatory element involved in light responsiveness
HrMADS61	GT1-motif	GGTTAA	6	-	Arabidopsis thaliana	light responsive element
HrMADS61	GT1-motif	GGTTAA	6	-	Arabidopsis thaliana	light responsive element
HrMADS61	HD-Zip 3	GTAAT(G/C)ATTAC	9.5	+	Arabidopsis thaliana	protein binding site
HrMADS61	I-box	GTATAAGGCC	9	+	Larix laricina	part of a light responsive element
HrMADS61	MBS	CAACTG	6	-	Arabidopsis thaliana	MYB binding site involved in drought-inducibility
HrMADS61	TCT-motif	TCTTAC	6	-	Arabidopsis thaliana	part of a light responsive element
HrMADS61	TCT-motif	TCTTAC	6	-	Arabidopsis thaliana	part of a light responsive element
HrMADS61	TCT-motif	TCTTAC	6	-	Arabidopsis thaliana	part of a light responsive element
HrMADS61	TGACG-motif	TGACG	5	-	Hordeum vulgare	cis-acting regulatory element involved in the MeJA-responsiveness
HrMADS61	WUN-motif	AAATTTCCT	9	+	Brassica oleracea	wound-responsive element
HrMADS62	ABRE	ACGTG	5	-	Arabidopsis thaliana	cis-acting element involved in the abscisic acid responsiveness
HrMADS62	AE-box	AGAAACTT	8	-	Arabidopsis thaliana	part of a module for light response
HrMADS62	ARE	AAACCA	6	-	Zea mays	cis-acting regulatory element essential for the anaerobic induction
HrMADS62	ARE	AAACCA	6	-	Zea mays	cis-acting regulatory element essential for the anaerobic induction
HrMADS62	Box 4	ATTAAT	6	+	Petroselinum crispum	part of a conserved DNA module involved in light responsiveness
HrMADS62	Box 4	ATTAAT	6	-	Petroselinum crispum	part of a conserved DNA module involved in light responsiveness
HrMADS62	Box 4	ATTAAT	6	-	Petroselinum crispum	part of a conserved DNA module involved in light responsiveness
HrMADS62	Box 4	ATTAAT	6	-	Petroselinum crispum	part of a conserved DNA module involved in light responsiveness
HrMADS62	Box 4	ATTAAT	6	-	Petroselinum crispum	part of a conserved DNA module involved in light responsiveness
HrMADS62	Box 4	ATTAAT	6	-	Petroselinum crispum	part of a conserved DNA module involved in light responsiveness
HrMADS62	Box 4	ATTAAT	6	-	Petroselinum crispum	part of a conserved DNA module involved in light responsiveness
HrMADS62	Box 4	ATTAAT	6	-	Petroselinum crispum	part of a conserved DNA module involved in light responsiveness
HrMADS62	CGTCA-motif	CGTCA	5	+	Hordeum vulgare	cis-acting regulatory element involved in the MeJA-responsiveness
HrMADS62	CGTCA-motif	CGTCA	5	-	Hordeum vulgare	cis-acting regulatory element involved in the MeJA-responsiveness
HrMADS62	GATA-motif	AAGGATAAGG	9	+	Solanum tuberosum	part of a light responsive element
HrMADS62	GATA-motif	AAGGATAAGG	9	+	Solanum tuberosum	part of a light responsive element
HrMADS62	G-box	CACGAC	6	+	Zea mays	cis-acting regulatory element involved in light responsiveness
HrMADS62	G-Box	CACGTT	6	+	Pisum sativum	cis-acting regulatory element involved in light responsiveness
HrMADS62	GT1-motif	GGTTAA	6	+	Arabidopsis thaliana	light responsive element
HrMADS62	GT1-motif	GGTTAA	6	+	Arabidopsis thaliana	light responsive element
HrMADS62	I-box	gGATAAGGTG	9	+	Zea mays	part of a light responsive element
HrMADS62	L-box	ATCCCACCTAC	10	+	Petroselinum crispum	part of a light responsive element
HrMADS62	MBS	CAACTG	6	-	Arabidopsis thaliana	MYB binding site involved in drought-inducibility
HrMADS62	MRE	AACCTAA	7	-	Petroselinum crispum	MYB binding site involved in light responsiveness
HrMADS62	TATC-box	TATCCCA	7	+	Oryza sativa	cis-acting element involved in gibberellin-responsiveness
HrMADS62	TCA-element	CCATCTTTTT	9	+	Nicotiana tabacum	cis-acting element involved in salicylic acid responsiveness
HrMADS62	TCA-element	CCATCTTTTT	9	+	Nicotiana tabacum	cis-acting element involved in salicylic acid responsiveness
HrMADS62	TCT-motif	TCTTAC	6	+	Arabidopsis thaliana	part of a light responsive element
HrMADS62	TCT-motif	TCTTAC	6	+	Arabidopsis thaliana	part of a light responsive element
HrMADS62	TCT-motif	TCTTAC	6	+	Arabidopsis thaliana	part of a light responsive element
HrMADS62	TCT-motif	TCTTAC	6	-	Arabidopsis thaliana	part of a light responsive element
HrMADS62	TCT-motif	TCTTAC	6	-	Arabidopsis thaliana	part of a light responsive element
HrMADS62	TGACG-motif	TGACG	5	-	Hordeum vulgare	cis-acting regulatory element involved in the MeJA-responsiveness
HrMADS62	TGACG-motif	TGACG	5	+	Hordeum vulgare	cis-acting regulatory element involved in the MeJA-responsiveness
HrMADS63	ARE	AAACCA	6	+	Zea mays	cis-acting regulatory element essential for the anaerobic induction
HrMADS63	Box 4	ATTAAT	6	+	Petroselinum crispum	part of a conserved DNA module involved in light responsiveness
HrMADS63	Box 4	ATTAAT	6	+	Petroselinum crispum	part of a conserved DNA module involved in light responsiveness
HrMADS63	Box 4	ATTAAT	6	+	Petroselinum crispum	part of a conserved DNA module involved in light responsiveness
HrMADS63	Box 4	ATTAAT	6	-	Petroselinum crispum	part of a conserved DNA module involved in light responsiveness
HrMADS63	Box 4	ATTAAT	6	-	Petroselinum crispum	part of a conserved DNA module involved in light responsiveness
HrMADS63	CGTCA-motif	CGTCA	5	-	Hordeum vulgare	cis-acting regulatory element involved in the MeJA-responsiveness
HrMADS63	chs-CMA1a	TTACTTAA	8	+	Daucus carota	part of a light responsive element
HrMADS63	GARE-motif	TCTGTTG	7	+	Brassica oleracea	gibberellin-responsive element
HrMADS63	G-box	TAACACGTAG	9	+	Brassica oleracea	cis-acting regulatory element involved in light responsiveness
HrMADS63	G-box	CACGAC	6	+	Zea mays	cis-acting regulatory element involved in light responsiveness
HrMADS63	GT1-motif	GGTTAAT	7	-	Avena sativa	light responsive element
HrMADS63	GT1-motif	GGTTAA	6	-	Arabidopsis thaliana	light responsive element
HrMADS63	P-box	CCTTTTG	7	-	Oryza sativa	gibberellin-responsive element
HrMADS63	TCT-motif	TCTTAC	6	-	Arabidopsis thaliana	part of a light responsive element
HrMADS63	TGACG-motif	TGACG	5	+	Hordeum vulgare	cis-acting regulatory element involved in the MeJA-responsiveness
HrMADS64	AAAC-motif	CAATCAAAACCT	11	-	Spinacia oleracea	light responsive element
HrMADS64	ABRE	ACGTG	5	-	Arabidopsis thaliana	cis-acting element involved in the abscisic acid responsiveness
HrMADS64	ACE	CTAACGTATT	9	-	Petroselinum crispum	cis-acting element involved in light responsiveness
HrMADS64	ARE	AAACCA	6	+	Zea mays	cis-acting regulatory element essential for the anaerobic induction
HrMADS64	Box 4	ATTAAT	6	-	Petroselinum crispum	part of a conserved DNA module involved in light responsiveness
HrMADS64	Box 4	ATTAAT	6	-	Petroselinum crispum	part of a conserved DNA module involved in light responsiveness
HrMADS64	GATA-motif	AAGGATAAGG	9	+	Solanum tuberosum	part of a light responsive element
HrMADS64	GATA-motif	AAGGATAAGG	9	+	Solanum tuberosum	part of a light responsive element
HrMADS64	G-Box	CACGTT	6	+	Pisum sativum	cis-acting regulatory element involved in light responsiveness
HrMADS64	GCN4_motif	TGAGTCA	7	-	Oryza sativa	cis-regulatory element involved in endosperm expression
HrMADS64	GT1-motif	GGTTAA	6	-	Arabidopsis thaliana	light responsive element
HrMADS64	LTR	CCGAAA	6	-	Hordeum vulgare	cis-acting element involved in low-temperature responsiveness
HrMADS64	MBS	CAACTG	6	+	Arabidopsis thaliana	MYB binding site involved in drought-inducibility
HrMADS64	TCA-element	CCATCTTTTT	9	-	Nicotiana tabacum	cis-acting element involved in salicylic acid responsiveness
HrMADS64	TCT-motif	TCTTAC	6	-	Arabidopsis thaliana	part of a light responsive element
HrMADS65	ABRE	ACGTG	5	+	Arabidopsis thaliana	cis-acting element involved in the abscisic acid responsiveness
HrMADS65	Box 4	ATTAAT	6	+	Petroselinum crispum	part of a conserved DNA module involved in light responsiveness
HrMADS65	CGTCA-motif	CGTCA	5	+	Hordeum vulgare	cis-acting regulatory element involved in the MeJA-responsiveness
HrMADS65	CGTCA-motif	CGTCA	5	+	Hordeum vulgare	cis-acting regulatory element involved in the MeJA-responsiveness
HrMADS65	CGTCA-motif	CGTCA	5	+	Hordeum vulgare	cis-acting regulatory element involved in the MeJA-responsiveness
HrMADS65	GATA-motif	GATAGGA	7	+	Arabidopsis thaliana	part of a light responsive element
HrMADS65	GATA-motif	GATAGGA	7	-	Arabidopsis thaliana	part of a light responsive element
HrMADS65	GATA-motif	AAGGATAAGG	9	-	Solanum tuberosum	part of a light responsive element
HrMADS65	G-box	CACGAC	6	+	Zea mays	cis-acting regulatory element involved in light responsiveness
HrMADS65	G-Box	CACGTT	6	-	Pisum sativum	cis-acting regulatory element involved in light responsiveness
HrMADS65	HD-Zip 1	CAAT(A/T)ATTG	8	+	Arabidopsis thaliana	element involved in differentiation of the palisade mesophyll cells
HrMADS65	I-box	cGATAAGGCG	9	+	Zea mays	part of a light responsive element
HrMADS65	I-box	AGATAAGG	8	-	Triticum aestivum	part of a light responsive element
HrMADS65	LAMP-element	CTTTATCA	8	+	Pisum sativum	part of a light responsive element
HrMADS65	MBS	CAACTG	6	-	Arabidopsis thaliana	MYB binding site involved in drought-inducibility
HrMADS65	P-box	CCTTTTG	7	-	Oryza sativa	gibberellin-responsive element
HrMADS65	P-box	CCTTTTG	7	-	Oryza sativa	gibberellin-responsive element
HrMADS65	TATC-box	TATCCCA	7	+	Oryza sativa	cis-acting element involved in gibberellin-responsiveness
HrMADS65	TCA-element	CCATCTTTTT	9	+	Nicotiana tabacum	cis-acting element involved in salicylic acid responsiveness
HrMADS65	TCCC-motif	TCTCCCT	7	+	Spinacia oleracea	part of a light responsive element
HrMADS65	TCT-motif	TCTTAC	6	+	Arabidopsis thaliana	part of a light responsive element
HrMADS65	TGACG-motif	TGACG	5	-	Hordeum vulgare	cis-acting regulatory element involved in the MeJA-responsiveness
HrMADS65	TGACG-motif	TGACG	5	-	Hordeum vulgare	cis-acting regulatory element involved in the MeJA-responsiveness
HrMADS65	TGACG-motif	TGACG	5	-	Hordeum vulgare	cis-acting regulatory element involved in the MeJA-responsiveness
HrMADS66	ABRE	ACGTG	5	+	Arabidopsis thaliana	cis-acting element involved in the abscisic acid responsiveness
HrMADS66	ABRE	ACGTG	5	+	Arabidopsis thaliana	cis-acting element involved in the abscisic acid responsiveness
HrMADS66	ABRE	ACGTG	5	-	Arabidopsis thaliana	cis-acting element involved in the abscisic acid responsiveness
HrMADS66	ABRE	ACGTG	5	+	Arabidopsis thaliana	cis-acting element involved in the abscisic acid responsiveness
HrMADS66	ABRE	ACGTG	5	-	Arabidopsis thaliana	cis-acting element involved in the abscisic acid responsiveness
HrMADS66	ABRE	ACGTG	5	-	Arabidopsis thaliana	cis-acting element involved in the abscisic acid responsiveness
HrMADS66	AE-box	AGAAACTT	8	+	Arabidopsis thaliana	part of a module for light response
HrMADS66	ARE	AAACCA	6	-	Zea mays	cis-acting regulatory element essential for the anaerobic induction
HrMADS66	CAT-box	GCCACT	6	-	Arabidopsis thaliana	cis-acting regulatory element related to meristem expression
HrMADS66	CGTCA-motif	CGTCA	5	-	Hordeum vulgare	cis-acting regulatory element involved in the MeJA-responsiveness
HrMADS66	G-Box	CACGTT	6	-	Pisum sativum	cis-acting regulatory element involved in light responsiveness
HrMADS66	G-Box	CACGTT	6	+	Pisum sativum	cis-acting regulatory element involved in light responsiveness
HrMADS66	G-box	CACGTC	6	-	Zea mays	cis-acting regulatory element involved in light responsiveness
HrMADS66	G-box	CCACGTAA	8	-	Brassica napus	cis-acting regulatory element involved in light responsiveness
HrMADS66	G-box	TACGTG	6	+	Arabidopsis thaliana	cis-acting regulatory element involved in light responsiveness
HrMADS66	G-box	TACGTG	6	-	Arabidopsis thaliana	cis-acting regulatory element involved in light responsiveness
HrMADS66	G-box	CACGTC	6	+	Zea mays	cis-acting regulatory element involved in light responsiveness
HrMADS66	GT1-motif	GGTTAAT	7	-	Avena sativa	light responsive element
HrMADS66	GT1-motif	GGTTAA	6	-	Arabidopsis thaliana	light responsive element
HrMADS66	GT1-motif	GGTTAA	6	+	Arabidopsis thaliana	light responsive element
HrMADS66	GT1-motif	GGTTAA	6	+	Arabidopsis thaliana	light responsive element
HrMADS66	MBS	CAACTG	6	+	Arabidopsis thaliana	MYB binding site involved in drought-inducibility
HrMADS66	TCA-element	CCATCTTTTT	9	+	Nicotiana tabacum	cis-acting element involved in salicylic acid responsiveness
HrMADS66	TCA-element	CCATCTTTTT	9	+	Nicotiana tabacum	cis-acting element involved in salicylic acid responsiveness
HrMADS66	TCCC-motif	TCTCCCT	7	+	Spinacia oleracea	part of a light responsive element
HrMADS66	TGACG-motif	TGACG	5	+	Hordeum vulgare	cis-acting regulatory element involved in the MeJA-responsiveness
HrMADS67	ARE	AAACCA	6	+	Zea mays	cis-acting regulatory element essential for the anaerobic induction
HrMADS67	ATCT-motif	AATCTAATCC	9	-	Pisum sativum	part of a conserved DNA module involved in light responsiveness
HrMADS67	ATCT-motif	AATCTAATCC	9	+	Pisum sativum	part of a conserved DNA module involved in light responsiveness
HrMADS67	ATCT-motif	AATCTAATCC	9	+	Pisum sativum	part of a conserved DNA module involved in light responsiveness
HrMADS67	Box 4	ATTAAT	6	-	Petroselinum crispum	part of a conserved DNA module involved in light responsiveness
HrMADS67	Box 4	ATTAAT	6	-	Petroselinum crispum	part of a conserved DNA module involved in light responsiveness
HrMADS67	Box III	atCATTTTCACt	11	-	Pisum sativum	protein binding site
HrMADS67	CGTCA-motif	CGTCA	5	-	Hordeum vulgare	cis-acting regulatory element involved in the MeJA-responsiveness
HrMADS67	GARE-motif	TCTGTTG	7	-	Brassica oleracea	gibberellin-responsive element
HrMADS67	GT1-motif	GGTTAA	6	+	Arabidopsis thaliana	light responsive element
HrMADS67	O2-site	GATGACATGG	9	-	Zea mays	cis-acting regulatory element involved in zein metabolism regulation
HrMADS67	TC-rich repeats	GTTTTCTTAC	9	+	Nicotiana tabacum	cis-acting element involved in defense and stress responsiveness
HrMADS67	TCT-motif	TCTTAC	6	+	Arabidopsis thaliana	part of a light responsive element
HrMADS67	TCT-motif	TCTTAC	6	+	Arabidopsis thaliana	part of a light responsive element
HrMADS67	TCT-motif	TCTTAC	6	+	Arabidopsis thaliana	part of a light responsive element
HrMADS67	TGACG-motif	TGACG	5	+	Hordeum vulgare	cis-acting regulatory element involved in the MeJA-responsiveness
HrMADS68	ARE	AAACCA	6	+	Zea mays	cis-acting regulatory element essential for the anaerobic induction
HrMADS68	ARE	AAACCA	6	+	Zea mays	cis-acting regulatory element essential for the anaerobic induction
HrMADS68	Box 4	ATTAAT	6	+	Petroselinum crispum	part of a conserved DNA module involved in light responsiveness
HrMADS68	Box 4	ATTAAT	6	-	Petroselinum crispum	part of a conserved DNA module involved in light responsiveness
HrMADS68	Box 4	ATTAAT	6	-	Petroselinum crispum	part of a conserved DNA module involved in light responsiveness
HrMADS68	Box 4	ATTAAT	6	-	Petroselinum crispum	part of a conserved DNA module involved in light responsiveness
HrMADS68	Box 4	ATTAAT	6	-	Petroselinum crispum	part of a conserved DNA module involved in light responsiveness
HrMADS68	CAT-box	GCCACT	6	-	Arabidopsis thaliana	cis-acting regulatory element related to meristem expression
HrMADS68	G-box	CACGAC	6	+	Zea mays	cis-acting regulatory element involved in light responsiveness
HrMADS68	HMG-TATA-region	CTATAAATGCATTTC	14	-	Lycopersicon esculentum	cis-acting regulatory element
HrMADS68	I-box	TGATAATGT	9	-	Solanum tuberosum	part of a light responsive element
HrMADS68	LAMP-element	CTTTATCA	8	+	Pisum sativum	part of a light responsive element
HrMADS68	O2-site	GATGA(C/T)(A/G)TG(A/G)	8	-	Zea mays	cis-acting regulatory element involved in zein metabolism regulation
HrMADS68	P-box	CCTTTTG	7	-	Oryza sativa	gibberellin-responsive element
HrMADS68	TCA-element	CCATCTTTTT	9	-	Nicotiana tabacum	cis-acting element involved in salicylic acid responsiveness
HrMADS68	TCT-motif	TCTTAC	6	+	Arabidopsis thaliana	part of a light responsive element
HrMADS69	ABRE	ACGTG	5	+	Arabidopsis thaliana	cis-acting element involved in the abscisic acid responsiveness
HrMADS69	AE-box	AGAAACAA	8	-	Arabidopsis thaliana	part of a module for light response
HrMADS69	AE-box	AGAAACAA	8	-	Arabidopsis thaliana	part of a module for light response
HrMADS69	ARE	AAACCA	6	+	Zea mays	cis-acting regulatory element essential for the anaerobic induction
HrMADS69	ARE	AAACCA	6	-	Zea mays	cis-acting regulatory element essential for the anaerobic induction
HrMADS69	ATCT-motif	AATCTAATCC	9	-	Pisum sativum	part of a conserved DNA module involved in light responsiveness
HrMADS69	Box 4	ATTAAT	6	+	Petroselinum crispum	part of a conserved DNA module involved in light responsiveness
HrMADS69	Box 4	ATTAAT	6	+	Petroselinum crispum	part of a conserved DNA module involved in light responsiveness
HrMADS69	Box 4	ATTAAT	6	-	Petroselinum crispum	part of a conserved DNA module involved in light responsiveness
HrMADS69	Box III	atCATTTTCACt	12	+	Pisum sativum	protein binding site
HrMADS69	GARE-motif	TCTGTTG	7	-	Brassica oleracea	gibberellin-responsive element
HrMADS69	GATA-motif	AAGATAAGATT	10	+	Arabidopsis thaliana	part of a light responsive element
HrMADS69	G-Box	CACGTT	6	-	Pisum sativum	cis-acting regulatory element involved in light responsiveness
HrMADS69	LTR	CCGAAA	6	-	Hordeum vulgare	cis-acting element involved in low-temperature responsiveness
HrMADS69	O2-site	GATGACATGG	9	-	Zea mays	cis-acting regulatory element involved in zein metabolism regulation
HrMADS69	O2-site	GATGA(C/T)(A/G)TG(A/G)	8	-	Zea mays	cis-acting regulatory element involved in zein metabolism regulation
HrMADS69	P-box	CCTTTTG	7	-	Oryza sativa	gibberellin-responsive element
HrMADS69	TATC-box	TATCCCA	7	-	Oryza sativa	cis-acting element involved in gibberellin-responsiveness
HrMADS69	TCT-motif	TCTTAC	6	+	Arabidopsis thaliana	part of a light responsive element
HrMADS69	WUN-motif	AAATTTCCT	9	+	Brassica oleracea	wound-responsive element
HrMADS7	ABRE	ACGTG	5	-	Arabidopsis thaliana	cis-acting element involved in the abscisic acid responsiveness
HrMADS7	ARE	AAACCA	6	+	Zea mays	cis-acting regulatory element essential for the anaerobic induction
HrMADS7	AT1-motif	AATTATTTTTTATT	13	-	Solanum tuberosum	part of a light responsive module
HrMADS7	Box 4	ATTAAT	6	+	Petroselinum crispum	part of a conserved DNA module involved in light responsiveness
HrMADS7	Box 4	ATTAAT	6	-	Petroselinum crispum	part of a conserved DNA module involved in light responsiveness
HrMADS7	Box 4	ATTAAT	6	-	Petroselinum crispum	part of a conserved DNA module involved in light responsiveness
HrMADS7	Box 4	ATTAAT	6	-	Petroselinum crispum	part of a conserved DNA module involved in light responsiveness
HrMADS7	Box 4	ATTAAT	6	-	Petroselinum crispum	part of a conserved DNA module involved in light responsiveness
HrMADS7	Box 4	ATTAAT	6	-	Petroselinum crispum	part of a conserved DNA module involved in light responsiveness
HrMADS7	GARE-motif	TCTGTTG	7	+	Brassica oleracea	gibberellin-responsive element
HrMADS7	GARE-motif	TCTGTTG	7	+	Brassica oleracea	gibberellin-responsive element
HrMADS7	G-box	TACGTG	6	-	Arabidopsis thaliana	cis-acting regulatory element involved in light responsiveness
HrMADS7	MBSI	aaaAaaC(G/C)GTTA	10.5	-	Petunia hybrida	MYB binding site involved in flavonoid biosynthetic genes regulation
HrMADS7	RY-element	CATGCATG	8	+	Helianthus annuus	cis-acting regulatory element involved in seed-specific regulation
HrMADS7	TC-rich repeats	ATTCTCTAAC	9	+	Nicotiana tabacum	cis-acting element involved in defense and stress responsiveness
HrMADS7	TC-rich repeats	ATTCTCTAAC	9	-	Nicotiana tabacum	cis-acting element involved in defense and stress responsiveness
HrMADS7	TCT-motif	TCTTAC	6	+	Arabidopsis thaliana	part of a light responsive element
HrMADS70	3-AF1 binding site	TAAGAGAGGAA	10	-	Solanum tuberosum	light responsive element
HrMADS70	ABRE	ACGTG	5	-	Arabidopsis thaliana	cis-acting element involved in the abscisic acid responsiveness
HrMADS70	ARE	AAACCA	6	-	Zea mays	cis-acting regulatory element essential for the anaerobic induction
HrMADS70	ARE	AAACCA	6	-	Zea mays	cis-acting regulatory element essential for the anaerobic induction
HrMADS70	ARE	AAACCA	6	-	Zea mays	cis-acting regulatory element essential for the anaerobic induction
HrMADS70	ARE	AAACCA	6	-	Zea mays	cis-acting regulatory element essential for the anaerobic induction
HrMADS70	ARE	AAACCA	6	-	Zea mays	cis-acting regulatory element essential for the anaerobic induction
HrMADS70	ARE	AAACCA	6	-	Zea mays	cis-acting regulatory element essential for the anaerobic induction
HrMADS70	ARE	AAACCA	6	-	Zea mays	cis-acting regulatory element essential for the anaerobic induction
HrMADS70	ATCT-motif	AATCTAATCC	9	-	Pisum sativum	part of a conserved DNA module involved in light responsiveness
HrMADS70	AT-rich sequence	TAAAATACT	9	+	Pisum sativum	element for maximal elicitor-mediated activation (2copies)
HrMADS70	Box 4	ATTAAT	6	-	Petroselinum crispum	part of a conserved DNA module involved in light responsiveness
HrMADS70	CAT-box	GCCACT	6	-	Arabidopsis thaliana	cis-acting regulatory element related to meristem expression
HrMADS70	CGTCA-motif	CGTCA	5	+	Hordeum vulgare	cis-acting regulatory element involved in the MeJA-responsiveness
HrMADS70	GATA-motif	AAGATAAGATT	10	+	Arabidopsis thaliana	part of a light responsive element
HrMADS70	GATA-motif	GATAGGA	7	-	Arabidopsis thaliana	part of a light responsive element
HrMADS70	G-Box	CACGTT	6	+	Pisum sativum	cis-acting regulatory element involved in light responsiveness
HrMADS70	G-box	CACGAC	6	+	Zea mays	cis-acting regulatory element involved in light responsiveness
HrMADS70	GCN4_motif	TGAGTCA	7	+	Oryza sativa	cis-regulatory element involved in endosperm expression
HrMADS70	GT1-motif	GGTTAA	6	-	Arabidopsis thaliana	light responsive element
HrMADS70	GT1-motif	GGTTAA	6	+	Arabidopsis thaliana	light responsive element
HrMADS70	HD-Zip 1	CAAT(A/T)ATTG	8.5	+	Arabidopsis thaliana	element involved in differentiation of the palisade mesophyll cells
HrMADS70	MBS	CAACTG	6	-	Arabidopsis thaliana	MYB binding site involved in drought-inducibility
HrMADS70	MRE	AACCTAA	7	+	Petroselinum crispum	MYB binding site involved in light responsiveness
HrMADS70	O2-site	GATGATGTGG	9	-	Zea mays	cis-acting regulatory element involved in zein metabolism regulation
HrMADS70	TGACG-motif	TGACG	5	-	Hordeum vulgare	cis-acting regulatory element involved in the MeJA-responsiveness
HrMADS71	ABRE	ACGTG	5	+	Arabidopsis thaliana	cis-acting element involved in the abscisic acid responsiveness
HrMADS71	AE-box	AGAAACTT	8	+	Arabidopsis thaliana	part of a module for light response
HrMADS71	AE-box	AGAAACAA	8	+	Arabidopsis thaliana	part of a module for light response
HrMADS71	Box 4	ATTAAT	6	-	Petroselinum crispum	part of a conserved DNA module involved in light responsiveness
HrMADS71	Box 4	ATTAAT	6	-	Petroselinum crispum	part of a conserved DNA module involved in light responsiveness
HrMADS71	Box III	atCATTTTCACt	11	+	Pisum sativum	protein binding site
HrMADS71	CAT-box	GCCACT	6	+	Arabidopsis thaliana	cis-acting regulatory element related to meristem expression
HrMADS71	CCAAT-box	CAACGG	6	+	Hordeum vulgare	MYBHv1 binding site
HrMADS71	circadian	CAAAGATATC	9	-	Lycopersicon esculentum	cis-acting regulatory element involved in circadian control
HrMADS71	GARE-motif	TCTGTTG	7	-	Brassica oleracea	gibberellin-responsive element
HrMADS71	G-box	TACGTG	6	+	Arabidopsis thaliana	cis-acting regulatory element involved in light responsiveness
HrMADS71	GT1-motif	GGTTAA	6	-	Arabidopsis thaliana	light responsive element
HrMADS71	GT1-motif	GGTTAAT	7	-	Avena sativa	light responsive element
HrMADS71	GT1-motif	GGTTAA	6	-	Arabidopsis thaliana	light responsive element
HrMADS71	MBS	CAACTG	6	+	Arabidopsis thaliana	MYB binding site involved in drought-inducibility
HrMADS71	P-box	CCTTTTG	7	+	Oryza sativa	gibberellin-responsive element
HrMADS71	TCA-element	CCATCTTTTT	9	+	Nicotiana tabacum	cis-acting element involved in salicylic acid responsiveness
HrMADS71	TCCC-motif	TCTCCCT	7	+	Spinacia oleracea	part of a light responsive element
HrMADS71	TCT-motif	TCTTAC	6	-	Arabidopsis thaliana	part of a light responsive element
HrMADS72	AAAC-motif	CAATCAAAACCT	11	-	Spinacia oleracea	light responsive element
HrMADS72	ABRE	ACGTG	5	+	Arabidopsis thaliana	cis-acting element involved in the abscisic acid responsiveness
HrMADS72	ABRE	ACGTG	5	+	Arabidopsis thaliana	cis-acting element involved in the abscisic acid responsiveness
HrMADS72	ABRE	GCAACGTGTC	9	+	Hordeum vulgare	cis-acting element involved in the abscisic acid responsiveness
HrMADS72	ABRE	ACGTG	5	+	Arabidopsis thaliana	cis-acting element involved in the abscisic acid responsiveness
HrMADS72	ARE	AAACCA	6	+	Zea mays	cis-acting regulatory element essential for the anaerobic induction
HrMADS72	ARE	AAACCA	6	+	Zea mays	cis-acting regulatory element essential for the anaerobic induction
HrMADS72	ATCT-motif	AATCTAATCC	9	-	Pisum sativum	part of a conserved DNA module involved in light responsiveness
HrMADS72	Box 4	ATTAAT	6	+	Petroselinum crispum	part of a conserved DNA module involved in light responsiveness
HrMADS72	Box 4	ATTAAT	6	+	Petroselinum crispum	part of a conserved DNA module involved in light responsiveness
HrMADS72	Box 4	ATTAAT	6	-	Petroselinum crispum	part of a conserved DNA module involved in light responsiveness
HrMADS72	Box 4	ATTAAT	6	-	Petroselinum crispum	part of a conserved DNA module involved in light responsiveness
HrMADS72	Box 4	ATTAAT	6	-	Petroselinum crispum	part of a conserved DNA module involved in light responsiveness
HrMADS72	CGTCA-motif	CGTCA	5	+	Hordeum vulgare	cis-acting regulatory element involved in the MeJA-responsiveness
HrMADS72	chs-CMA1a	TTACTTAA	8	-	Daucus carota	part of a light responsive element
HrMADS72	circadian	CAAAGATATC	9	+	Lycopersicon esculentum	cis-acting regulatory element involved in circadian control
HrMADS72	GA-motif	ATAGATAA	8	+	Arabidopsis thaliana	part of a light responsive element
HrMADS72	G-Box	CACGTT	6	-	Pisum sativum	cis-acting regulatory element involved in light responsiveness
HrMADS72	G-Box	CACGTT	6	-	Pisum sativum	cis-acting regulatory element involved in light responsiveness
HrMADS72	G-Box	CACGTT	6	-	Pisum sativum	cis-acting regulatory element involved in light responsiveness
HrMADS72	GT1-motif	GGTTAA	6	-	Arabidopsis thaliana	light responsive element
HrMADS72	I-box	GTATAAGGCC	9	-	Larix laricina	part of a light responsive element
HrMADS72	TC-rich repeats	ATTCTCTAAC	9	+	Nicotiana tabacum	cis-acting element involved in defense and stress responsiveness
HrMADS72	TCT-motif	TCTTAC	6	+	Arabidopsis thaliana	part of a light responsive element
HrMADS72	TGA-box	TGACGTAA	8	-	Glycine max	part of an auxin-responsive element
HrMADS72	TGACG-motif	TGACG	5	-	Hordeum vulgare	cis-acting regulatory element involved in the MeJA-responsiveness
HrMADS73	AAAC-motif	CAATCAAAACCT	11	-	Spinacia oleracea	light responsive element
HrMADS73	ABRE	ACGTG	5	+	Arabidopsis thaliana	cis-acting element involved in the abscisic acid responsiveness
HrMADS73	ARE	AAACCA	6	+	Zea mays	cis-acting regulatory element essential for the anaerobic induction
HrMADS73	ARE	AAACCA	6	-	Zea mays	cis-acting regulatory element essential for the anaerobic induction
HrMADS73	ARE	AAACCA	6	-	Zea mays	cis-acting regulatory element essential for the anaerobic induction
HrMADS73	Box 4	ATTAAT	6	+	Petroselinum crispum	part of a conserved DNA module involved in light responsiveness
HrMADS73	Box 4	ATTAAT	6	-	Petroselinum crispum	part of a conserved DNA module involved in light responsiveness
HrMADS73	Box 4	ATTAAT	6	-	Petroselinum crispum	part of a conserved DNA module involved in light responsiveness
HrMADS73	Box 4	ATTAAT	6	-	Petroselinum crispum	part of a conserved DNA module involved in light responsiveness
HrMADS73	Box 4	ATTAAT	6	-	Petroselinum crispum	part of a conserved DNA module involved in light responsiveness
HrMADS73	CGTCA-motif	CGTCA	5	+	Hordeum vulgare	cis-acting regulatory element involved in the MeJA-responsiveness
HrMADS73	chs-CMA2c	ATATACGTGAAGG	13	+	Daucus carota	part of a light responsive element
HrMADS73	circadian	CAAAGATATC	9	-	Lycopersicon esculentum	cis-acting regulatory element involved in circadian control
HrMADS73	G-box	TACGTG	6	+	Arabidopsis thaliana	cis-acting regulatory element involved in light responsiveness
HrMADS73	GT1-motif	GGTTAA	6	+	Arabidopsis thaliana	light responsive element
HrMADS73	GT1-motif	GGTTAAT	7	+	Avena sativa	light responsive element
HrMADS73	MBSI	TTTTTACGGTTA	11	+	Petunia hybrida	MYB binding site involved in flavonoid biosynthetic genes regulation
HrMADS73	TGACG-motif	TGACG	5	-	Hordeum vulgare	cis-acting regulatory element involved in the MeJA-responsiveness
HrMADS74	ACE	CTAACGTATT	9	-	Petroselinum crispum	cis-acting element involved in light responsiveness
HrMADS74	ARE	AAACCA	6	-	Zea mays	cis-acting regulatory element essential for the anaerobic induction
HrMADS74	AT1-motif	AATTATTTTTTATT	13	-	Solanum tuberosum	part of a light responsive module
HrMADS74	AT1-motif	AATTATTTTTTATT	13	-	Solanum tuberosum	part of a light responsive module
HrMADS74	AT-rich element	ATAGAAATCAA	10	+	Glycine max	binding site of AT-rich DNA binding protein (ATBP-1)
HrMADS74	Box 4	ATTAAT	6	+	Petroselinum crispum	part of a conserved DNA module involved in light responsiveness
HrMADS74	Box 4	ATTAAT	6	+	Petroselinum crispum	part of a conserved DNA module involved in light responsiveness
HrMADS74	Box 4	ATTAAT	6	+	Petroselinum crispum	part of a conserved DNA module involved in light responsiveness
HrMADS74	Box 4	ATTAAT	6	+	Petroselinum crispum	part of a conserved DNA module involved in light responsiveness
HrMADS74	Box 4	ATTAAT	6	-	Petroselinum crispum	part of a conserved DNA module involved in light responsiveness
HrMADS74	Box 4	ATTAAT	6	-	Petroselinum crispum	part of a conserved DNA module involved in light responsiveness
HrMADS74	Box 4	ATTAAT	6	-	Petroselinum crispum	part of a conserved DNA module involved in light responsiveness
HrMADS74	Box 4	ATTAAT	6	-	Petroselinum crispum	part of a conserved DNA module involved in light responsiveness
HrMADS74	CAG-motif	GAAAGGCAGAC	10	-	Arabidopsis thaliana	part of a light response element
HrMADS74	CGTCA-motif	CGTCA	5	-	Hordeum vulgare	cis-acting regulatory element involved in the MeJA-responsiveness
HrMADS74	GATA-motif	AAGGATAAGG	9	-	Solanum tuberosum	part of a light responsive element
HrMADS74	GATA-motif	AAGGATAAGG	9	-	Solanum tuberosum	part of a light responsive element
HrMADS74	GATA-motif	GATAGGG	7	+	Pisum sativum	part of a light responsive element
HrMADS74	GT1-motif	GGTTAA	6	-	Arabidopsis thaliana	light responsive element
HrMADS74	GT1-motif	GGTTAA	6	+	Arabidopsis thaliana	light responsive element
HrMADS74	HD-Zip 3	GTAAT(G/C)ATTAC	9.5	-	Arabidopsis thaliana	protein binding site
HrMADS74	TCT-motif	TCTTAC	6	+	Arabidopsis thaliana	part of a light responsive element
HrMADS74	TGACG-motif	TGACG	5	+	Hordeum vulgare	cis-acting regulatory element involved in the MeJA-responsiveness
HrMADS75	ACE	CTAACGTATT	9	+	Petroselinum crispum	cis-acting element involved in light responsiveness
HrMADS75	AE-box	AGAAACTT	8	-	Arabidopsis thaliana	part of a module for light response
HrMADS75	AE-box	AGAAACAA	8	-	Arabidopsis thaliana	part of a module for light response
HrMADS75	ARE	AAACCA	6	+	Zea mays	cis-acting regulatory element essential for the anaerobic induction
HrMADS75	ARE	AAACCA	6	+	Zea mays	cis-acting regulatory element essential for the anaerobic induction
HrMADS75	ARE	AAACCA	6	-	Zea mays	cis-acting regulatory element essential for the anaerobic induction
HrMADS75	ATC-motif	AGTAATCT	8	-	Spinacia oleracea	part of a conserved DNA module involved in light responsiveness
HrMADS75	ATCT-motif	AATCTAATCC	9	-	Pisum sativum	part of a conserved DNA module involved in light responsiveness
HrMADS75	AT-rich sequence	TAAAATACT	9	+	Pisum sativum	element for maximal elicitor-mediated activation (2copies)
HrMADS75	Box 4	ATTAAT	6	+	Petroselinum crispum	part of a conserved DNA module involved in light responsiveness
HrMADS75	Box 4	ATTAAT	6	+	Petroselinum crispum	part of a conserved DNA module involved in light responsiveness
HrMADS75	Box 4	ATTAAT	6	+	Petroselinum crispum	part of a conserved DNA module involved in light responsiveness
HrMADS75	CGTCA-motif	CGTCA	5	-	Hordeum vulgare	cis-acting regulatory element involved in the MeJA-responsiveness
HrMADS75	CGTCA-motif	CGTCA	5	+	Hordeum vulgare	cis-acting regulatory element involved in the MeJA-responsiveness
HrMADS75	circadian	CAAAGATATC	9	+	Lycopersicon esculentum	cis-acting regulatory element involved in circadian control
HrMADS75	GA-motif	ATAGATAA	8	+	Arabidopsis thaliana	part of a light responsive element
HrMADS75	GA-motif	ATAGATAA	8	-	Arabidopsis thaliana	part of a light responsive element
HrMADS75	GATA-motif	AAGATAAGATT	10	-	Arabidopsis thaliana	part of a light responsive element
HrMADS75	GATA-motif	GATAGGG	7	-	Pisum sativum	part of a light responsive element
HrMADS75	MBS	CAACTG	6	-	Arabidopsis thaliana	MYB binding site involved in drought-inducibility
HrMADS75	MBS	CAACTG	6	-	Arabidopsis thaliana	MYB binding site involved in drought-inducibility
HrMADS75	TCA-element	CCATCTTTTT	9	-	Nicotiana tabacum	cis-acting element involved in salicylic acid responsiveness
HrMADS75	TCA-element	CCATCTTTTT	9	-	Nicotiana tabacum	cis-acting element involved in salicylic acid responsiveness
HrMADS75	TGA-box	TGACGTAA	8	+	Glycine max	part of an auxin-responsive element
HrMADS75	TGACG-motif	TGACG	5	+	Hordeum vulgare	cis-acting regulatory element involved in the MeJA-responsiveness
HrMADS75	TGACG-motif	TGACG	5	-	Hordeum vulgare	cis-acting regulatory element involved in the MeJA-responsiveness
HrMADS75	TGA-element	AACGAC	6	-	Brassica oleracea	auxin-responsive element
HrMADS76	ABRE	ACGTG	5	+	Arabidopsis thaliana	cis-acting element involved in the abscisic acid responsiveness
HrMADS76	AE-box	AGAAACTT	8	+	Arabidopsis thaliana	part of a module for light response
HrMADS76	ARE	AAACCA	6	-	Zea mays	cis-acting regulatory element essential for the anaerobic induction
HrMADS76	ARE	AAACCA	6	-	Zea mays	cis-acting regulatory element essential for the anaerobic induction
HrMADS76	Box 4	ATTAAT	6	+	Petroselinum crispum	part of a conserved DNA module involved in light responsiveness
HrMADS76	Box 4	ATTAAT	6	+	Petroselinum crispum	part of a conserved DNA module involved in light responsiveness
HrMADS76	Box 4	ATTAAT	6	+	Petroselinum crispum	part of a conserved DNA module involved in light responsiveness
HrMADS76	Box 4	ATTAAT	6	+	Petroselinum crispum	part of a conserved DNA module involved in light responsiveness
HrMADS76	Box 4	ATTAAT	6	+	Petroselinum crispum	part of a conserved DNA module involved in light responsiveness
HrMADS76	Box 4	ATTAAT	6	-	Petroselinum crispum	part of a conserved DNA module involved in light responsiveness
HrMADS76	Box 4	ATTAAT	6	-	Petroselinum crispum	part of a conserved DNA module involved in light responsiveness
HrMADS76	Box 4	ATTAAT	6	-	Petroselinum crispum	part of a conserved DNA module involved in light responsiveness
HrMADS76	Box 4	ATTAAT	6	-	Petroselinum crispum	part of a conserved DNA module involved in light responsiveness
HrMADS76	Box 4	ATTAAT	6	-	Petroselinum crispum	part of a conserved DNA module involved in light responsiveness
HrMADS76	Box 4	ATTAAT	6	-	Petroselinum crispum	part of a conserved DNA module involved in light responsiveness
HrMADS76	CGTCA-motif	CGTCA	5	-	Hordeum vulgare	cis-acting regulatory element involved in the MeJA-responsiveness
HrMADS76	CGTCA-motif	CGTCA	5	-	Hordeum vulgare	cis-acting regulatory element involved in the MeJA-responsiveness
HrMADS76	circadian	CAAAGATATC	9	+	Lycopersicon esculentum	cis-acting regulatory element involved in circadian control
HrMADS76	GA-motif	ATAGATAA	8	-	Arabidopsis thaliana	part of a light responsive element
HrMADS76	GA-motif	ATAGATAA	8	+	Arabidopsis thaliana	part of a light responsive element
HrMADS76	G-box	CACGTC	6	-	Zea mays	cis-acting regulatory element involved in light responsiveness
HrMADS76	HD-Zip 1	CAAT(A/T)ATTG	8.5	+	Arabidopsis thaliana	element involved in differentiation of the palisade mesophyll cells
HrMADS76	LAMP-element	CTTTATCA	8	-	Pisum sativum	part of a light responsive element
HrMADS76	LTR	CCGAAA	6	-	Hordeum vulgare	cis-acting element involved in low-temperature responsiveness
HrMADS76	MBS	CAACTG	6	+	Arabidopsis thaliana	MYB binding site involved in drought-inducibility
HrMADS76	TCA-element	CCATCTTTTT	9	-	Nicotiana tabacum	cis-acting element involved in salicylic acid responsiveness
HrMADS76	TGACG-motif	TGACG	5	+	Hordeum vulgare	cis-acting regulatory element involved in the MeJA-responsiveness
HrMADS76	TGACG-motif	TGACG	5	+	Hordeum vulgare	cis-acting regulatory element involved in the MeJA-responsiveness
HrMADS77	ABRE	CGTACGTGCA	9	-	Hordeum vulgare	cis-acting element involved in the abscisic acid responsiveness
HrMADS77	ABRE	ACGTG	5	-	Arabidopsis thaliana	cis-acting element involved in the abscisic acid responsiveness
HrMADS77	ABRE	ACGTG	5	-	Arabidopsis thaliana	cis-acting element involved in the abscisic acid responsiveness
HrMADS77	ARE	AAACCA	6	-	Zea mays	cis-acting regulatory element essential for the anaerobic induction
HrMADS77	ARE	AAACCA	6	-	Zea mays	cis-acting regulatory element essential for the anaerobic induction
HrMADS77	AuxRR-core	GGTCCAT	7	+	Nicotiana tabacum	cis-acting regulatory element involved in auxin responsiveness
HrMADS77	Box 4	ATTAAT	6	-	Petroselinum crispum	part of a conserved DNA module involved in light responsiveness
HrMADS77	CGTCA-motif	CGTCA	5	+	Hordeum vulgare	cis-acting regulatory element involved in the MeJA-responsiveness
HrMADS77	GARE-motif	TCTGTTG	7	+	Brassica oleracea	gibberellin-responsive element
HrMADS77	G-box	TACGTG	6	-	Arabidopsis thaliana	cis-acting regulatory element involved in light responsiveness
HrMADS77	G-Box	CACGTT	6	+	Pisum sativum	cis-acting regulatory element involved in light responsiveness
HrMADS77	GT1-motif	GGTTAA	6	-	Arabidopsis thaliana	light responsive element
HrMADS77	GT1-motif	GGTTAAT	7	-	Avena sativa	light responsive element
HrMADS77	GT1-motif	GGTTAA	6	-	Arabidopsis thaliana	light responsive element
HrMADS77	I-box	AAGATAAGGCT	10	-	Gossypium hirsutum	part of a light responsive element
HrMADS77	I-box	AGATAAGG	8	-	Triticum aestivum	part of a light responsive element
HrMADS77	P-box	CCTTTTG	7	-	Oryza sativa	gibberellin-responsive element
HrMADS77	TATC-box	TATCCCA	7	+	Oryza sativa	cis-acting element involved in gibberellin-responsiveness
HrMADS77	TATC-box	TATCCCA	7	-	Oryza sativa	cis-acting element involved in gibberellin-responsiveness
HrMADS77	TCCC-motif	TCTCCCT	7	+	Spinacia oleracea	part of a light responsive element
HrMADS77	TCT-motif	TCTTAC	6	+	Arabidopsis thaliana	part of a light responsive element
HrMADS77	TGACG-motif	TGACG	5	-	Hordeum vulgare	cis-acting regulatory element involved in the MeJA-responsiveness
HrMADS78	3-AF3 binding site	CACTATCTAAC	10	-	Pisum sativum	part of a conserved DNA module array (CMA3)
HrMADS78	ABRE	ACGTG	5	+	Arabidopsis thaliana	cis-acting element involved in the abscisic acid responsiveness
HrMADS78	ABRE	ACGTG	5	-	Arabidopsis thaliana	cis-acting element involved in the abscisic acid responsiveness
HrMADS78	ACE	CTAACGTATT	9	+	Petroselinum crispum	cis-acting element involved in light responsiveness
HrMADS78	ARE	AAACCA	6	-	Zea mays	cis-acting regulatory element essential for the anaerobic induction
HrMADS78	ARE	AAACCA	6	+	Zea mays	cis-acting regulatory element essential for the anaerobic induction
HrMADS78	Box 4	ATTAAT	6	+	Petroselinum crispum	part of a conserved DNA module involved in light responsiveness
HrMADS78	Box 4	ATTAAT	6	+	Petroselinum crispum	part of a conserved DNA module involved in light responsiveness
HrMADS78	Box 4	ATTAAT	6	-	Petroselinum crispum	part of a conserved DNA module involved in light responsiveness
HrMADS78	Box 4	ATTAAT	6	-	Petroselinum crispum	part of a conserved DNA module involved in light responsiveness
HrMADS78	CCAAT-box	CAACGG	6	+	Hordeum vulgare	MYBHv1 binding site
HrMADS78	CGTCA-motif	CGTCA	5	-	Hordeum vulgare	cis-acting regulatory element involved in the MeJA-responsiveness
HrMADS78	chs-CMA1a	TTACTTAA	8	-	Daucus carota	part of a light responsive element
HrMADS78	GA-motif	ATAGATAA	8	-	Arabidopsis thaliana	part of a light responsive element
HrMADS78	GA-motif	ATAGATAA	8	+	Arabidopsis thaliana	part of a light responsive element
HrMADS78	G-box	CACGAC	6	+	Zea mays	cis-acting regulatory element involved in light responsiveness
HrMADS78	G-box	CACGTC	6	+	Zea mays	cis-acting regulatory element involved in light responsiveness
HrMADS78	G-Box	CACGTT	6	-	Pisum sativum	cis-acting regulatory element involved in light responsiveness
HrMADS78	GT1-motif	GGTTAA	6	+	Arabidopsis thaliana	light responsive element
HrMADS78	GT1-motif	GGTTAA	6	-	Arabidopsis thaliana	light responsive element
HrMADS78	TC-rich repeats	ATTCTCTAAC	9	-	Nicotiana tabacum	cis-acting element involved in defense and stress responsiveness
HrMADS78	TGACG-motif	TGACG	5	+	Hordeum vulgare	cis-acting regulatory element involved in the MeJA-responsiveness
HrMADS79	ARE	AAACCA	6	+	Zea mays	cis-acting regulatory element essential for the anaerobic induction
HrMADS79	ARE	AAACCA	6	-	Zea mays	cis-acting regulatory element essential for the anaerobic induction
HrMADS79	AT1-motif	AATTATTTTTTATT	13	-	Solanum tuberosum	part of a light responsive module
HrMADS79	AT-rich sequence	TAAAATACT	9	+	Pisum sativum	element for maximal elicitor-mediated activation (2copies)
HrMADS79	Box 4	ATTAAT	6	+	Petroselinum crispum	part of a conserved DNA module involved in light responsiveness
HrMADS79	Box 4	ATTAAT	6	+	Petroselinum crispum	part of a conserved DNA module involved in light responsiveness
HrMADS79	Box 4	ATTAAT	6	+	Petroselinum crispum	part of a conserved DNA module involved in light responsiveness
HrMADS79	Box 4	ATTAAT	6	+	Petroselinum crispum	part of a conserved DNA module involved in light responsiveness
HrMADS79	Box 4	ATTAAT	6	+	Petroselinum crispum	part of a conserved DNA module involved in light responsiveness
HrMADS79	Box 4	ATTAAT	6	-	Petroselinum crispum	part of a conserved DNA module involved in light responsiveness
HrMADS79	Box 4	ATTAAT	6	-	Petroselinum crispum	part of a conserved DNA module involved in light responsiveness
HrMADS79	Box 4	ATTAAT	6	-	Petroselinum crispum	part of a conserved DNA module involved in light responsiveness
HrMADS79	Box 4	ATTAAT	6	-	Petroselinum crispum	part of a conserved DNA module involved in light responsiveness
HrMADS79	chs-CMA1a	TTACTTAA	8	+	Daucus carota	part of a light responsive element
HrMADS79	circadian	CAAAGATATC	9	-	Lycopersicon esculentum	cis-acting regulatory element involved in circadian control
HrMADS79	Gap-box	CAAATGAA(A/G)A	9	+	Arabidopsis thaliana	part of a light responsive element
HrMADS79	GATA-motif	GATAGGA	7	-	Arabidopsis thaliana	part of a light responsive element
HrMADS79	GT1-motif	GGTTAA	6	+	Arabidopsis thaliana	light responsive element
HrMADS79	MBSI	aaaAaaC(G/C)GTTA	10.5	+	Petunia hybrida	MYB binding site involved in flavonoid biosynthetic genes regulation
HrMADS79	MRE	AACCTAA	7	+	Petroselinum crispum	MYB binding site involved in light responsiveness
HrMADS79	P-box	CCTTTTG	7	+	Oryza sativa	gibberellin-responsive element
HrMADS79	P-box	CCTTTTG	7	-	Oryza sativa	gibberellin-responsive element
HrMADS79	TCA-element	CCATCTTTTT	9	+	Nicotiana tabacum	cis-acting element involved in salicylic acid responsiveness
HrMADS79	TCA-element	CCATCTTTTT	9	-	Nicotiana tabacum	cis-acting element involved in salicylic acid responsiveness
HrMADS8	A-box	CCGTCC	6	-	Petroselinum crispum	cis-acting regulatory element
HrMADS8	ABRE	CACGTG	6	-	Arabidopsis thaliana	cis-acting element involved in the abscisic acid responsiveness
HrMADS8	ABRE	ACGTG	5	+	Arabidopsis thaliana	cis-acting element involved in the abscisic acid responsiveness
HrMADS8	AE-box	AGAAACTT	8	-	Arabidopsis thaliana	part of a module for light response
HrMADS8	ARE	AAACCA	6	+	Zea mays	cis-acting regulatory element essential for the anaerobic induction
HrMADS8	ARE	AAACCA	6	-	Zea mays	cis-acting regulatory element essential for the anaerobic induction
HrMADS8	ARE	AAACCA	6	-	Zea mays	cis-acting regulatory element essential for the anaerobic induction
HrMADS8	ATC-motif	AGTAATCT	8	+	Spinacia oleracea	part of a conserved DNA module involved in light responsiveness
HrMADS8	ATC-motif	AGTAATCT	8	+	Spinacia oleracea	part of a conserved DNA module involved in light responsiveness
HrMADS8	ATCT-motif	AATCTAATCC	9	+	Pisum sativum	part of a conserved DNA module involved in light responsiveness
HrMADS8	ATCT-motif	AATCTAATCC	9	+	Pisum sativum	part of a conserved DNA module involved in light responsiveness
HrMADS8	AuxRR-core	GGTCCAT	7	+	Nicotiana tabacum	cis-acting regulatory element involved in auxin responsiveness
HrMADS8	AuxRR-core	GGTCCAT	7	+	Nicotiana tabacum	cis-acting regulatory element involved in auxin responsiveness
HrMADS8	Box 4	ATTAAT	6	+	Petroselinum crispum	part of a conserved DNA module involved in light responsiveness
HrMADS8	Box 4	ATTAAT	6	+	Petroselinum crispum	part of a conserved DNA module involved in light responsiveness
HrMADS8	Box 4	ATTAAT	6	+	Petroselinum crispum	part of a conserved DNA module involved in light responsiveness
HrMADS8	Box 4	ATTAAT	6	-	Petroselinum crispum	part of a conserved DNA module involved in light responsiveness
HrMADS8	Box 4	ATTAAT	6	-	Petroselinum crispum	part of a conserved DNA module involved in light responsiveness
HrMADS8	Box 4	ATTAAT	6	-	Petroselinum crispum	part of a conserved DNA module involved in light responsiveness
HrMADS8	Box 4	ATTAAT	6	-	Petroselinum crispum	part of a conserved DNA module involved in light responsiveness
HrMADS8	CGTCA-motif	CGTCA	5	+	Hordeum vulgare	cis-acting regulatory element involved in the MeJA-responsiveness
HrMADS8	CGTCA-motif	CGTCA	5	+	Hordeum vulgare	cis-acting regulatory element involved in the MeJA-responsiveness
HrMADS8	G-Box	CACGTG	6	-	Pisum sativum	cis-acting regulatory element involved in light responsiveness
HrMADS8	G-box	CACGTG	6	-	Arabidopsis thaliana	cis-acting regulatory element involved in light responsiveness
HrMADS8	I-box	cCATATCCAAT	10	+	Flaveria trinervia	part of a light responsive element
HrMADS8	MBS	CAACTG	6	+	Arabidopsis thaliana	MYB binding site involved in drought-inducibility
HrMADS8	MBS	CAACTG	6	+	Arabidopsis thaliana	MYB binding site involved in drought-inducibility
HrMADS8	TCT-motif	TCTTAC	6	-	Arabidopsis thaliana	part of a light responsive element
HrMADS8	TGACG-motif	TGACG	5	-	Hordeum vulgare	cis-acting regulatory element involved in the MeJA-responsiveness
HrMADS8	TGACG-motif	TGACG	5	-	Hordeum vulgare	cis-acting regulatory element involved in the MeJA-responsiveness
HrMADS80	ARE	AAACCA	6	+	Zea mays	cis-acting regulatory element essential for the anaerobic induction
HrMADS80	AT-rich element	ATAGAAATCAA	10	-	Glycine max	binding site of AT-rich DNA binding protein (ATBP-1)
HrMADS80	AT-rich sequence	TAAAATACT	9	+	Pisum sativum	element for maximal elicitor-mediated activation (2copies)
HrMADS80	Box 4	ATTAAT	6	+	Petroselinum crispum	part of a conserved DNA module involved in light responsiveness
HrMADS80	Box 4	ATTAAT	6	-	Petroselinum crispum	part of a conserved DNA module involved in light responsiveness
HrMADS80	Box 4	ATTAAT	6	-	Petroselinum crispum	part of a conserved DNA module involved in light responsiveness
HrMADS80	Box 4	ATTAAT	6	-	Petroselinum crispum	part of a conserved DNA module involved in light responsiveness
HrMADS80	Box II	TGGTAATAA	9	-	Solanum tuberosum	part of a light responsive element
HrMADS80	CGTCA-motif	CGTCA	5	-	Hordeum vulgare	cis-acting regulatory element involved in the MeJA-responsiveness
HrMADS80	CGTCA-motif	CGTCA	5	-	Hordeum vulgare	cis-acting regulatory element involved in the MeJA-responsiveness
HrMADS80	GT1-motif	GGTTAA	6	-	Arabidopsis thaliana	light responsive element
HrMADS80	I-box	TGATAATGT	9	+	Solanum tuberosum	part of a light responsive element
HrMADS80	I-box	cCATATCCAAT	10	-	Flaveria trinervia	part of a light responsive element
HrMADS80	TCA-element	CCATCTTTTT	9	-	Nicotiana tabacum	cis-acting element involved in salicylic acid responsiveness
HrMADS80	TCCC-motif	TCTCCCT	7	+	Spinacia oleracea	part of a light responsive element
HrMADS80	TCT-motif	TCTTAC	6	-	Arabidopsis thaliana	part of a light responsive element
HrMADS80	TGACG-motif	TGACG	5	+	Hordeum vulgare	cis-acting regulatory element involved in the MeJA-responsiveness
HrMADS80	TGACG-motif	TGACG	5	+	Hordeum vulgare	cis-acting regulatory element involved in the MeJA-responsiveness
HrMADS81	ARE	AAACCA	6	+	Zea mays	cis-acting regulatory element essential for the anaerobic induction
HrMADS81	Box 4	ATTAAT	6	+	Petroselinum crispum	part of a conserved DNA module involved in light responsiveness
HrMADS81	Box 4	ATTAAT	6	+	Petroselinum crispum	part of a conserved DNA module involved in light responsiveness
HrMADS81	Box 4	ATTAAT	6	+	Petroselinum crispum	part of a conserved DNA module involved in light responsiveness
HrMADS81	Box 4	ATTAAT	6	+	Petroselinum crispum	part of a conserved DNA module involved in light responsiveness
HrMADS81	Box 4	ATTAAT	6	-	Petroselinum crispum	part of a conserved DNA module involved in light responsiveness
HrMADS81	Box 4	ATTAAT	6	-	Petroselinum crispum	part of a conserved DNA module involved in light responsiveness
HrMADS81	Box 4	ATTAAT	6	-	Petroselinum crispum	part of a conserved DNA module involved in light responsiveness
HrMADS81	Box 4	ATTAAT	6	-	Petroselinum crispum	part of a conserved DNA module involved in light responsiveness
HrMADS81	Box 4	ATTAAT	6	-	Petroselinum crispum	part of a conserved DNA module involved in light responsiveness
HrMADS81	Box 4	ATTAAT	6	-	Petroselinum crispum	part of a conserved DNA module involved in light responsiveness
HrMADS81	Box 4	ATTAAT	6	-	Petroselinum crispum	part of a conserved DNA module involved in light responsiveness
HrMADS81	chs-CMA1a	TTACTTAA	8	-	Daucus carota	part of a light responsive element
HrMADS81	circadian	CAAAGATATC	9	+	Lycopersicon esculentum	cis-acting regulatory element involved in circadian control
HrMADS81	Gap-box	CAAATGAA(A/G)A	9.5	+	Arabidopsis thaliana	part of a light responsive element
HrMADS81	LAMP-element	CTTTATCA	8	+	Pisum sativum	part of a light responsive element
HrMADS81	TCT-motif	TCTTAC	6	+	Arabidopsis thaliana	part of a light responsive element
HrMADS81	TCT-motif	TCTTAC	6	+	Arabidopsis thaliana	part of a light responsive element
HrMADS82	ABRE	ACGTG	5	+	Arabidopsis thaliana	cis-acting element involved in the abscisic acid responsiveness
HrMADS82	AT1-motif	AATTATTTTTTATT	13	+	Solanum tuberosum	part of a light responsive module
HrMADS82	AT1-motif	AATTATTTTTTATT	13	+	Solanum tuberosum	part of a light responsive module
HrMADS82	AT-rich element	ATAGAAATCAA	10	-	Glycine max	binding site of AT-rich DNA binding protein (ATBP-1)
HrMADS82	AuxRR-core	GGTCCAT	7	+	Nicotiana tabacum	cis-acting regulatory element involved in auxin responsiveness
HrMADS82	Box 4	ATTAAT	6	+	Petroselinum crispum	part of a conserved DNA module involved in light responsiveness
HrMADS82	Box 4	ATTAAT	6	+	Petroselinum crispum	part of a conserved DNA module involved in light responsiveness
HrMADS82	Box 4	ATTAAT	6	+	Petroselinum crispum	part of a conserved DNA module involved in light responsiveness
HrMADS82	Box 4	ATTAAT	6	+	Petroselinum crispum	part of a conserved DNA module involved in light responsiveness
HrMADS82	Box 4	ATTAAT	6	+	Petroselinum crispum	part of a conserved DNA module involved in light responsiveness
HrMADS82	Box 4	ATTAAT	6	-	Petroselinum crispum	part of a conserved DNA module involved in light responsiveness
HrMADS82	Box 4	ATTAAT	6	-	Petroselinum crispum	part of a conserved DNA module involved in light responsiveness
HrMADS82	Box 4	ATTAAT	6	-	Petroselinum crispum	part of a conserved DNA module involved in light responsiveness
HrMADS82	Box 4	ATTAAT	6	-	Petroselinum crispum	part of a conserved DNA module involved in light responsiveness
HrMADS82	CGTCA-motif	CGTCA	5	+	Hordeum vulgare	cis-acting regulatory element involved in the MeJA-responsiveness
HrMADS82	GA-motif	ATAGATAA	8	+	Arabidopsis thaliana	part of a light responsive element
HrMADS82	GA-motif	ATAGATAA	8	-	Arabidopsis thaliana	part of a light responsive element
HrMADS82	GATA-motif	AAGGATAAGG	9	+	Solanum tuberosum	part of a light responsive element
HrMADS82	G-box	TACGTG	6	+	Arabidopsis thaliana	cis-acting regulatory element involved in light responsiveness
HrMADS82	MBS	CAACTG	6	+	Arabidopsis thaliana	MYB binding site involved in drought-inducibility
HrMADS82	TGACG-motif	TGACG	5	-	Hordeum vulgare	cis-acting regulatory element involved in the MeJA-responsiveness
HrMADS82	TGA-element	AACGAC	6	+	Brassica oleracea	auxin-responsive element
HrMADS83	3-AF1 binding site	TAAGAGAGGAA	10	-	Solanum tuberosum	light responsive element
HrMADS83	ABRE	ACGTG	5	-	Arabidopsis thaliana	cis-acting element involved in the abscisic acid responsiveness
HrMADS83	ABRE	ACGTG	5	+	Arabidopsis thaliana	cis-acting element involved in the abscisic acid responsiveness
HrMADS83	ABRE	CACGTG	6	-	Arabidopsis thaliana	cis-acting element involved in the abscisic acid responsiveness
HrMADS83	ABRE	ACGTG	5	+	Arabidopsis thaliana	cis-acting element involved in the abscisic acid responsiveness
HrMADS83	AE-box	AGAAACTT	8	-	Arabidopsis thaliana	part of a module for light response
HrMADS83	ARE	AAACCA	6	+	Zea mays	cis-acting regulatory element essential for the anaerobic induction
HrMADS83	Box 4	ATTAAT	6	+	Petroselinum crispum	part of a conserved DNA module involved in light responsiveness
HrMADS83	Box 4	ATTAAT	6	+	Petroselinum crispum	part of a conserved DNA module involved in light responsiveness
HrMADS83	Box 4	ATTAAT	6	+	Petroselinum crispum	part of a conserved DNA module involved in light responsiveness
HrMADS83	Box 4	ATTAAT	6	+	Petroselinum crispum	part of a conserved DNA module involved in light responsiveness
HrMADS83	Box 4	ATTAAT	6	+	Petroselinum crispum	part of a conserved DNA module involved in light responsiveness
HrMADS83	Box 4	ATTAAT	6	+	Petroselinum crispum	part of a conserved DNA module involved in light responsiveness
HrMADS83	Box 4	ATTAAT	6	-	Petroselinum crispum	part of a conserved DNA module involved in light responsiveness
HrMADS83	CAT-box	GCCACT	6	+	Arabidopsis thaliana	cis-acting regulatory element related to meristem expression
HrMADS83	CGTCA-motif	CGTCA	5	+	Hordeum vulgare	cis-acting regulatory element involved in the MeJA-responsiveness
HrMADS83	G-Box	CACGTT	6	+	Pisum sativum	cis-acting regulatory element involved in light responsiveness
HrMADS83	G-Box	CACGTG	6	-	Pisum sativum	cis-acting regulatory element involved in light responsiveness
HrMADS83	G-box	TACGTG	6	+	Arabidopsis thaliana	cis-acting regulatory element involved in light responsiveness
HrMADS83	G-box	CACGTG	6	-	Arabidopsis thaliana	cis-acting regulatory element involved in light responsiveness
HrMADS83	GT1-motif	GGTTAAT	7	-	Avena sativa	light responsive element
HrMADS83	GT1-motif	GGTTAA	6	-	Arabidopsis thaliana	light responsive element
HrMADS83	P-box	CCTTTTG	7	-	Oryza sativa	gibberellin-responsive element
HrMADS83	RY-element	CATGCATG	8	-	Helianthus annuus	cis-acting regulatory element involved in seed-specific regulation
HrMADS83	TC-rich repeats	ATTCTCTAAC	9	+	Nicotiana tabacum	cis-acting element involved in defense and stress responsiveness
HrMADS83	TCT-motif	TCTTAC	6	+	Arabidopsis thaliana	part of a light responsive element
HrMADS83	TGACG-motif	TGACG	5	-	Hordeum vulgare	cis-acting regulatory element involved in the MeJA-responsiveness
HrMADS83	TGA-element	AACGAC	6	+	Brassica oleracea	auxin-responsive element
HrMADS83	WUN-motif	AAATTTCCT	9	+	Brassica oleracea	wound-responsive element
HrMADS84	ABRE	ACGTG	5	-	Arabidopsis thaliana	cis-acting element involved in the abscisic acid responsiveness
HrMADS84	ARE	AAACCA	6	-	Zea mays	cis-acting regulatory element essential for the anaerobic induction
HrMADS84	ARE	AAACCA	6	-	Zea mays	cis-acting regulatory element essential for the anaerobic induction
HrMADS84	ATC-motif	AGTAATCT	8	+	Spinacia oleracea	part of a conserved DNA module involved in light responsiveness
HrMADS84	AT-rich sequence	TAAAATACT	9	-	Pisum sativum	element for maximal elicitor-mediated activation (2copies)
HrMADS84	Box 4	ATTAAT	6	-	Petroselinum crispum	part of a conserved DNA module involved in light responsiveness
HrMADS84	CGTCA-motif	CGTCA	5	+	Hordeum vulgare	cis-acting regulatory element involved in the MeJA-responsiveness
HrMADS84	GATA-motif	AAGGATAAGG	10	+	Solanum tuberosum	part of a light responsive element
HrMADS84	GATA-motif	AAGATAAGATT	10	-	Arabidopsis thaliana	part of a light responsive element
HrMADS84	GATA-motif	AAGATAAGATT	10	-	Arabidopsis thaliana	part of a light responsive element
HrMADS84	GATA-motif	GATAGGA	7	+	Arabidopsis thaliana	part of a light responsive element
HrMADS84	G-Box	CACGTT	6	+	Pisum sativum	cis-acting regulatory element involved in light responsiveness
HrMADS84	GT1-motif	GGTTAA	6	-	Arabidopsis thaliana	light responsive element
HrMADS84	I-box	ccttatcct	9	-	Arabidopsis thaliana	part of a light responsive element
HrMADS84	O2-site	GATGA(C/T)(A/G)TG(A/G)	8	+	Zea mays	cis-acting regulatory element involved in zein metabolism regulation
HrMADS84	TCA-element	TCAGAAGAGG	9	+	Brassica oleracea	cis-acting element involved in salicylic acid responsiveness
HrMADS84	TC-rich repeats	ATTCTCTAAC	9	+	Nicotiana tabacum	cis-acting element involved in defense and stress responsiveness
HrMADS84	TC-rich repeats	ATTCTCTAAC	9	+	Nicotiana tabacum	cis-acting element involved in defense and stress responsiveness
HrMADS84	TCT-motif	TCTTAC	6	+	Arabidopsis thaliana	part of a light responsive element
HrMADS84	TGACG-motif	TGACG	5	-	Hordeum vulgare	cis-acting regulatory element involved in the MeJA-responsiveness
HrMADS85	ARE	AAACCA	6	-	Zea mays	cis-acting regulatory element essential for the anaerobic induction
HrMADS85	ARE	AAACCA	6	+	Zea mays	cis-acting regulatory element essential for the anaerobic induction
HrMADS85	ARE	AAACCA	6	+	Zea mays	cis-acting regulatory element essential for the anaerobic induction
HrMADS85	ARE	AAACCA	6	+	Zea mays	cis-acting regulatory element essential for the anaerobic induction
HrMADS85	ARE	AAACCA	6	-	Zea mays	cis-acting regulatory element essential for the anaerobic induction
HrMADS85	ARE	AAACCA	6	-	Zea mays	cis-acting regulatory element essential for the anaerobic induction
HrMADS85	Box 4	ATTAAT	6	+	Petroselinum crispum	part of a conserved DNA module involved in light responsiveness
HrMADS85	Box 4	ATTAAT	6	+	Petroselinum crispum	part of a conserved DNA module involved in light responsiveness
HrMADS85	Box 4	ATTAAT	6	-	Petroselinum crispum	part of a conserved DNA module involved in light responsiveness
HrMADS85	Box 4	ATTAAT	6	-	Petroselinum crispum	part of a conserved DNA module involved in light responsiveness
HrMADS85	CGTCA-motif	CGTCA	5	-	Hordeum vulgare	cis-acting regulatory element involved in the MeJA-responsiveness
HrMADS85	CGTCA-motif	CGTCA	5	+	Hordeum vulgare	cis-acting regulatory element involved in the MeJA-responsiveness
HrMADS85	CGTCA-motif	CGTCA	5	-	Hordeum vulgare	cis-acting regulatory element involved in the MeJA-responsiveness
HrMADS85	circadian	CAAAGATATC	9	-	Lycopersicon esculentum	cis-acting regulatory element involved in circadian control
HrMADS85	GA-motif	ATAGATAA	8	-	Arabidopsis thaliana	part of a light responsive element
HrMADS85	GT1-motif	GGTTAA	6	-	Arabidopsis thaliana	light responsive element
HrMADS85	GT1-motif	GGTTAA	6	-	Arabidopsis thaliana	light responsive element
HrMADS85	LTR	CCGAAA	6	-	Hordeum vulgare	cis-acting element involved in low-temperature responsiveness
HrMADS85	MRE	AACCTAA	7	-	Petroselinum crispum	MYB binding site involved in light responsiveness
HrMADS85	P-box	CCTTTTG	7	+	Oryza sativa	gibberellin-responsive element
HrMADS85	TC-rich repeats	ATTCTCTAAC	10	-	Nicotiana tabacum	cis-acting element involved in defense and stress responsiveness
HrMADS85	TC-rich repeats	ATTCTCTAAC	9	-	Nicotiana tabacum	cis-acting element involved in defense and stress responsiveness
HrMADS85	TCT-motif	TCTTAC	6	+	Arabidopsis thaliana	part of a light responsive element
HrMADS85	TCT-motif	TCTTAC	6	-	Arabidopsis thaliana	part of a light responsive element
HrMADS85	TCT-motif	TCTTAC	6	-	Arabidopsis thaliana	part of a light responsive element
HrMADS85	TGACG-motif	TGACG	5	+	Hordeum vulgare	cis-acting regulatory element involved in the MeJA-responsiveness
HrMADS85	TGACG-motif	TGACG	5	-	Hordeum vulgare	cis-acting regulatory element involved in the MeJA-responsiveness
HrMADS85	TGACG-motif	TGACG	5	+	Hordeum vulgare	cis-acting regulatory element involved in the MeJA-responsiveness
HrMADS85	TGA-element	AACGAC	6	-	Brassica oleracea	auxin-responsive element
HrMADS86	3-AF1 binding site	TAAGAGAGGAA	10	+	Solanum tuberosum	light responsive element
HrMADS86	ARE	AAACCA	6	-	Zea mays	cis-acting regulatory element essential for the anaerobic induction
HrMADS86	ATCT-motif	AATCTAATCC	9	-	Pisum sativum	part of a conserved DNA module involved in light responsiveness
HrMADS86	ATCT-motif	AATCTAATCC	9	+	Pisum sativum	part of a conserved DNA module involved in light responsiveness
HrMADS86	AT-rich element	ATAGAAATCAA	10	-	Glycine max	binding site of AT-rich DNA binding protein (ATBP-1)
HrMADS86	Box 4	ATTAAT	6	+	Petroselinum crispum	part of a conserved DNA module involved in light responsiveness
HrMADS86	Box 4	ATTAAT	6	+	Petroselinum crispum	part of a conserved DNA module involved in light responsiveness
HrMADS86	Box 4	ATTAAT	6	+	Petroselinum crispum	part of a conserved DNA module involved in light responsiveness
HrMADS86	Box 4	ATTAAT	6	+	Petroselinum crispum	part of a conserved DNA module involved in light responsiveness
HrMADS86	Box 4	ATTAAT	6	+	Petroselinum crispum	part of a conserved DNA module involved in light responsiveness
HrMADS86	Box 4	ATTAAT	6	+	Petroselinum crispum	part of a conserved DNA module involved in light responsiveness
HrMADS86	Box 4	ATTAAT	6	-	Petroselinum crispum	part of a conserved DNA module involved in light responsiveness
HrMADS86	Box 4	ATTAAT	6	-	Petroselinum crispum	part of a conserved DNA module involved in light responsiveness
HrMADS86	Box 4	ATTAAT	6	-	Petroselinum crispum	part of a conserved DNA module involved in light responsiveness
HrMADS86	CGTCA-motif	CGTCA	5	+	Hordeum vulgare	cis-acting regulatory element involved in the MeJA-responsiveness
HrMADS86	GA-motif	ATAGATAA	8	-	Arabidopsis thaliana	part of a light responsive element
HrMADS86	GA-motif	ATAGATAA	8	-	Arabidopsis thaliana	part of a light responsive element
HrMADS86	GT1-motif	GGTTAA	6	-	Arabidopsis thaliana	light responsive element
HrMADS86	MRE	AACCTAA	7	-	Petroselinum crispum	MYB binding site involved in light responsiveness
HrMADS86	P-box	CCTTTTG	7	+	Oryza sativa	gibberellin-responsive element
HrMADS86	TCT-motif	TCTTAC	6	-	Arabidopsis thaliana	part of a light responsive element
HrMADS86	TGACG-motif	TGACG	5	-	Hordeum vulgare	cis-acting regulatory element involved in the MeJA-responsiveness
HrMADS87	ARE	AAACCA	6	-	Zea mays	cis-acting regulatory element essential for the anaerobic induction
HrMADS87	AT-rich element	ATAGAAATCAA	10	-	Glycine max	binding site of AT-rich DNA binding protein (ATBP-1)
HrMADS87	Box 4	ATTAAT	6	+	Petroselinum crispum	part of a conserved DNA module involved in light responsiveness
HrMADS87	Box 4	ATTAAT	6	+	Petroselinum crispum	part of a conserved DNA module involved in light responsiveness
HrMADS87	Box 4	ATTAAT	6	+	Petroselinum crispum	part of a conserved DNA module involved in light responsiveness
HrMADS87	Box 4	ATTAAT	6	-	Petroselinum crispum	part of a conserved DNA module involved in light responsiveness
HrMADS87	CGTCA-motif	CGTCA	5	-	Hordeum vulgare	cis-acting regulatory element involved in the MeJA-responsiveness
HrMADS87	CGTCA-motif	CGTCA	5	-	Hordeum vulgare	cis-acting regulatory element involved in the MeJA-responsiveness
HrMADS87	GA-motif	ATAGATAA	8	-	Arabidopsis thaliana	part of a light responsive element
HrMADS87	GATA-motif	AAGATAAGATT	10	-	Arabidopsis thaliana	part of a light responsive element
HrMADS87	GT1-motif	GGTTAAT	7	-	Avena sativa	light responsive element
HrMADS87	GT1-motif	GGTTAA	6	-	Arabidopsis thaliana	light responsive element
HrMADS87	MRE	AACCTAA	7	+	Petroselinum crispum	MYB binding site involved in light responsiveness
HrMADS87	P-box	CCTTTTG	7	-	Oryza sativa	gibberellin-responsive element
HrMADS87	TC-rich repeats	ATTCTCTAAC	9	+	Nicotiana tabacum	cis-acting element involved in defense and stress responsiveness
HrMADS87	TC-rich repeats	ATTCTCTAAC	9	+	Nicotiana tabacum	cis-acting element involved in defense and stress responsiveness
HrMADS87	TCT-motif	TCTTAC	6	-	Arabidopsis thaliana	part of a light responsive element
[truncated: 151 more rows]

## Sheet: Table S7
Table S7 Number of cis-acting elements in the promoter region of Hippophae rhamnoides ssp. sinensis MADS-box genes
Class	Gene Name	Hormone response Cis-acting Elements												Stress response Cis-acting Elements						Stress response Cis-acting Elements
		ABRE	AuxRE	AuxRR-core	CGTCA-motif	GARE-motif	P-box	SARE	TATC-box	TCA-element	TGA-box	TGACG-motif	TGA-element	ARE	GC-motif	LTR	MBS	TC-rich repeats	WUN-motif	3-AF3 binding site	3-AF1 binding site	4cl-CMA1c	AAAC-motif	AACA_motif	A-box	ACA-motif	ACE	AE-box	AT1-motif	ATC-motif	ATCT-motif	AT-rich sequence	AT-rich element	Box 4	Box II	Box III	CAG-motif	CAT-box	CCAAT-box	chs-CMA1a	chs-CMA2a	chs-CMA2c	chs-Unit 1 m1	circadian	GA-motif	Gap-box	GATA-motif	G-Box	GCN4_motif
Mα	HrMADS26	5	0	0	0	0	0	0	0	0	0	0	0	2	0	0	0	2	0	0	0	0	0	0	0	1	0	0	0	0	0	0	1	8	0	0	0	0	0	1	0	0	0	1	0	0	0	5	0
Mα	HrMADS29	0	0	0	1	0	1	0	0	0	0	1	0	3	0	1	2	0	0	0	0	0	0	0	0	0	0	0	0	0	0	0	0	1	0	0	0	1	0	0	0	0	0	0	0	0	0	0	2
Mα	HrMADS32	1	0	0	0	0	0	0	0	0	0	0	1	1	0	0	0	0	0	0	0	0	0	0	0	0	0	1	0	0	0	0	1	3	0	0	0	0	0	0	0	0	0	0	0	0	2	2	0
Mα	HrMADS71	1	0	0	0	1	1	0	0	1	0	0	0	0	0	0	1	0	0	0	0	0	0	0	0	0	0	2	0	0	0	0	0	2	0	1	0	1	1	0	0	0	0	1	0	0	0	1	0
Mα	HrMADS79	0	0	0	0	0	2	0	0	2	0	0	0	2	0	0	0	0	0	0	0	0	0	0	0	0	0	0	1	0	0	1	0	9	0	0	0	0	0	1	0	0	0	1	0	1	1	0	0
Mα	HrMADS83	4	0	0	1	0	1	0	0	0	0	1	1	1	0	0	0	1	1	0	1	0	0	0	0	0	0	1	0	0	0	0	0	7	0	0	0	1	0	0	0	0	0	0	0	0	0	4	0
Mβ	HrMADS2	0	0	0	1	1	1	0	1	0	0	1	0	2	0	0	1	0	0	0	0	0	1	0	0	0	1	1	0	0	0	0	0	3	0	0	0	0	1	0	0	0	0	0	1	0	0	0	0
Mβ	HrMADS4	2	0	0	3	0	0	0	0	0	0	3	0	4	0	0	1	0	1	0	1	0	0	0	0	0	0	0	0	0	0	0	1	2	1	0	0	0	0	0	0	0	0	0	0	0	1	2	0
Mβ	HrMADS6	1	0	0	0	2	0	0	0	0	0	0	0	1	0	0	0	2	0	0	0	0	0	0	0	0	0	0	1	0	0	0	0	6	0	0	0	0	0	0	0	0	0	0	1	0	0	1	0
Mβ	HrMADS9	2	0	0	1	0	0	0	0	1	0	1	0	3	0	0	0	1	0	0	0	0	0	0	0	0	0	0	0	0	1	1	0	2	0	0	0	0	0	0	0	0	0	1	0	0	0	2	1
Mβ	HrMADS11	1	0	0	0	0	0	0	1	0	0	0	0	2	0	0	0	0	0	0	0	0	0	0	0	0	0	0	1	0	0	0	0	3	0	0	0	1	1	0	0	0	0	0	0	0	3	1	2
Mβ	HrMADS13	0	1	0	2	0	0	0	0	1	0	2	0	2	0	0	0	1	0	0	0	0	0	0	0	0	1	1	0	0	0	0	0	3	0	0	0	1	0	0	0	0	0	0	4	0	0	0	0
Mβ	HrMADS17	1	0	0	0	0	2	0	0	1	0	0	0	2	0	0	0	1	0	0	0	0	0	0	0	0	0	3	0	0	0	0	0	1	0	0	0	1	0	0	0	0	0	1	0	0	0	1	0
Mβ	HrMADS18	1	0	0	0	0	2	0	0	1	0	0	0	2	0	0	0	1	0	0	0	0	0	0	0	0	0	3	0	0	0	0	0	1	0	0	0	1	0	0	0	0	0	1	0	0	0	1	0
Mβ	HrMADS22	0	0	0	1	1	1	0	0	1	0	1	0	1	0	0	0	1	0	0	0	0	0	0	0	0	0	2	0	0	0	0	0	0	0	0	0	0	0	0	0	0	0	0	0	1	0	0	0
Mβ	HrMADS24	1	0	0	1	0	0	0	0	1	0	1	0	4	0	1	1	0	0	0	0	0	0	0	0	0	0	0	0	1	0	0	0	3	0	0	0	0	1	0	0	0	0	0	1	1	1	1	0
Mβ	HrMADS28	2	0	0	1	0	0	0	1	0	0	1	1	2	0	0	0	1	0	0	1	0	0	0	0	0	0	0	0	0	2	0	0	4	0	0	0	1	0	1	0	0	0	0	0	0	0	2	0
Mβ	HrMADS31	1	0	1	1	0	0	0	0	1	0	1	0	2	0	0	1	1	1	0	0	0	0	0	0	0	0	0	0	0	1	1	2	2	0	1	0	0	0	0	1	0	0	1	0	0	0	1	0
Mβ	HrMADS39	0	0	0	0	0	0	0	0	1	0	0	1	3	0	0	2	0	0	0	0	0	0	0	0	0	0	0	0	0	0	0	1	0	0	0	0	0	2	0	0	0	0	0	1	0	1	0	0
Mβ	HrMADS40	4	0	0	2	0	1	0	0	0	0	2	0	6	0	0	0	1	0	0	0	0	0	0	0	0	0	2	0	0	0	0	0	4	0	0	0	1	0	0	0	0	0	0	0	0	1	3	0
Mβ	HrMADS45	0	0	0	0	0	0	0	0	2	0	0	0	3	0	0	0	1	0	0	0	0	0	0	0	0	0	0	1	0	0	0	0	4	0	0	0	0	0	0	0	0	0	0	0	1	1	0	0
Mβ	HrMADS49	0	0	0	1	1	1	0	0	2	0	1	1	2	0	0	0	0	0	0	0	1	0	0	0	0	0	1	0	0	0	0	0	0	1	0	0	2	0	0	0	0	0	0	0	0	1	0	0
Mβ	HrMADS53	3	0	0	0	0	0	0	0	0	0	0	0	2	1	0	0	0	0	0	0	0	0	0	0	0	0	1	1	0	0	0	0	6	0	0	0	0	0	1	0	0	0	0	0	0	0	4	0
Mβ	HrMADS57	1	0	0	0	0	0	0	0	2	0	0	0	3	0	0	0	1	0	0	0	0	0	1	0	0	0	2	1	0	0	0	1	7	1	0	0	1	0	0	0	0	0	0	1	0	0	1	0
Mβ	HrMADS60	0	0	0	0	0	0	0	1	0	0	0	0	1	0	0	0	0	1	0	1	0	0	0	0	0	0	1	1	0	0	0	0	10	0	0	0	0	0	0	0	0	0	0	0	0	0	0	0
Mβ	HrMADS63	0	0	0	1	1	1	0	0	0	0	1	0	1	0	0	0	0	0	0	0	0	0	0	0	0	0	0	0	0	0	0	0	5	0	0	0	0	0	1	0	0	0	0	0	0	0	2	0
Mβ	HrMADS64	1	0	0	0	0	0	0	0	1	0	0	0	1	0	1	1	0	0	0	0	0	1	0	0	0	1	0	0	0	0	0	0	2	0	0	0	0	0	0	0	0	0	0	0	0	2	1	1
Mβ	HrMADS65	1	0	0	3	0	2	0	1	1	0	3	0	0	0	0	1	0	0	0	0	0	0	0	0	0	0	0	0	0	0	0	0	1	0	0	0	0	0	0	0	0	0	0	0	0	3	2	0
Mβ	HrMADS67	0	0	0	1	1	0	0	0	0	0	1	0	1	0	0	0	1	0	0	0	0	0	0	0	0	0	0	0	0	3	0	0	2	0	1	0	0	0	0	0	0	0	0	0	0	0	0	0
Mβ	HrMADS70	1	0	0	1	0	0	0	0	0	0	1	0	7	0	0	1	0	0	0	1	0	0	0	0	0	0	0	0	0	1	1	0	1	0	0	0	1	0	0	0	0	0	0	0	0	2	2	1
Mβ	HrMADS73	1	0	0	1	0	0	0	0	0	0	1	0	3	0	0	0	0	0	0	0	0	1	0	0	0	0	0	0	0	0	0	0	5	0	0	0	0	0	0	0	1	0	1	0	0	0	1	0
Mβ	HrMADS77	3	0	1	1	1	1	0	2	0	0	1	0	2	0	0	0	0	0	0	0	0	0	0	0	0	0	0	0	0	0	0	0	1	0	0	0	0	0	0	0	0	0	0	0	0	0	2	0
Mβ	HrMADS80	0	0	0	2	0	0	0	0	1	0	2	0	1	0	0	0	1	0	0	0	0	0	0	0	0	0	0	0	0	0	1	0	4	1	0	0	0	0	0	0	0	0	0	0	0	0	0	0
Mβ	HrMADS86	0	0	0	1	0	1	0	0	0	0	1	0	1	0	0	0	0	0	0	1	0	0	0	0	0	0	0	0	0	2	0	1	9	0	0	0	0	0	0	0	0	0	0	2	0	0	0	0
Mβ	HrMADS87	0	0	0	2	0	1	0	0	0	1	2	0	1	0	0	0	2	0	0	0	0	0	0	0	0	0	0	0	0	0	0	1	4	0	0	0	0	0	0	0	0	0	0	1	0	1	0	0
Mβ	HrMADS92	2	0	0	1	1	0	0	0	0	0	1	1	0	0	3	0	4	1	0	0	0	0	0	1	0	0	0	1	0	0	0	0	8	0	0	0	0	0	1	0	0	0	1	0	0	0	2	0
Mγ	HrMADS15	1	0	0	0	0	0	0	0	0	0	0	0	1	0	0	0	3	0	0	0	0	0	0	0	0	0	0	0	0	0	0	0	5	0	0	0	0	0	1	0	0	0	1	0	0	0	1	0
Mγ	HrMADS16	2	0	0	0	0	0	0	1	0	0	0	0	1	0	0	0	1	0	0	0	0	0	0	0	0	0	0	0	0	0	0	2	4	0	0	0	0	0	2	0	0	0	1	0	0	0	3	0
Mγ	HrMADS38	1	0	0	0	0	1	0	1	0	0	0	0	0	0	0	0	0	0	0	0	0	0	0	0	0	0	0	0	0	1	0	0	2	0	0	0	0	0	1	0	0	0	0	0	1	0	1	0
Mγ	HrMADS58	3	0	0	0	0	1	0	0	0	0	0	0	1	0	1	0	0	0	0	0	0	0	0	0	0	0	1	0	0	0	0	1	2	1	0	0	0	1	0	0	0	0	3	1	0	0	4	0
Mγ	HrMADS74	0	0	0	1	0	0	0	0	0	0	1	0	1	0	0	0	0	0	0	0	0	0	0	0	0	1	0	2	0	0	0	1	8	0	0	1	0	0	0	0	0	0	0	0	0	3	0	0
Mγ	HrMADS82	1	0	1	1	0	0	0	0	0	0	1	1	0	0	0	1	0	0	0	0	0	0	0	0	0	0	0	2	0	0	0	1	9	0	0	0	0	0	0	0	0	0	0	2	0	1	1	0
MIKC*	HrMADS14	2	0	0	1	0	1	0	0	0	0	1	0	2	0	0	1	0	0	0	0	0	0	0	0	0	0	1	1	0	0	0	0	12	0	0	0	0	0	1	0	0	0	0	2	0	1	2	0
MIKC*	HrMADS46	4	0	0	1	1	0	0	0	0	0	1	4	3	0	3	0	1	0	0	0	0	0	0	0	0	0	1	0	0	0	0	0	6	0	0	1	0	0	0	0	0	0	0	1	0	0	6	1
MIKC*	HrMADS75	0	0	0	2	0	0	0	0	2	1	2	1	3	0	0	2	0	0	0	0	0	0	0	0	0	1	2	0	1	1	1	0	3	0	0	0	0	0	0	0	0	0	1	2	0	2	0	0
MIKC*	HrMADS90	1	0	0	1	0	1	0	0	0	0	1	0	4	0	0	1	0	0	0	0	0	0	0	0	0	0	1	1	0	0	0	0	5	0	0	0	0	0	0	0	0	0	0	0	0	0	2	0
MIKCC	HrMADS1	0	0	0	1	0	0	0	0	1	0	1	0	3	0	0	1	1	0	0	0	0	0	0	0	0	0	0	0	0	0	0	0	6	0	0	0	1	0	0	0	0	0	2	0	0	1	0	0
MIKCC	HrMADS3	1	0	0	2	0	1	0	0	2	0	2	1	5	0	0	1	0	0	0	0	0	0	0	0	0	0	1	0	0	0	0	0	2	0	0	0	0	0	1	0	0	0	0	0	0	0	1	1
MIKCC	HrMADS5	2	0	0	1	1	0	0	0	0	0	1	0	4	0	2	0	0	0	0	0	0	0	0	0	0	0	1	0	0	0	0	1	12	0	0	0	0	0	0	0	0	0	0	0	1	2	2	0
MIKCC	HrMADS7	1	0	0	0	2	0	0	0	0	0	0	0	1	0	0	0	2	0	0	0	0	0	0	0	0	0	0	1	0	0	0	0	6	0	0	0	0	0	0	0	0	0	0	0	0	0	1	0
MIKCC	HrMADS8	2	0	2	2	0	0	0	0	0	0	2	0	3	0	0	2	0	0	0	0	0	0	0	1	0	0	1	0	2	2	0	0	7	0	0	0	0	0	0	0	0	0	0	0	0	0	2	0
MIKCC	HrMADS10	2	0	0	0	0	1	0	1	0	0	0	1	2	0	0	0	1	0	0	0	0	0	0	0	0	0	1	0	0	1	0	0	5	0	0	0	0	0	1	0	0	0	0	0	0	1	1	0
MIKCC	HrMADS12	1	0	0	1	0	1	0	1	1	0	1	0	1	0	0	1	0	0	0	0	0	0	0	1	0	0	0	0	0	0	1	0	3	0	0	0	0	0	0	0	0	0	1	0	0	3	2	1
MIKCC	HrMADS19	0	0	0	2	0	0	0	0	0	0	2	0	4	0	0	0	2	0	0	0	0	0	0	0	0	0	2	0	0	1	1	0	6	0	0	0	1	0	0	0	0	0	0	2	0	1	0	0
MIKCC	HrMADS20	3	0	0	0	0	0	0	0	0	0	0	0	1	0	0	0	2	0	0	0	0	0	0	0	0	0	0	0	0	0	0	0	4	0	0	0	0	0	0	1	0	0	0	0	0	1	3	0
MIKCC	HrMADS21	0	0	0	1	0	1	0	0	3	0	1	0	1	0	2	0	0	0	0	0	0	0	0	0	0	0	0	0	0	0	0	0	7	1	0	0	0	0	0	0	0	0	0	1	0	1	0	0
MIKCC	HrMADS23	4	0	0	0	0	0	0	0	2	0	0	0	2	0	1	0	0	1	0	1	0	0	0	1	0	0	1	1	0	0	0	0	9	0	0	0	0	1	0	0	0	0	0	0	0	1	3	0
MIKCC	HrMADS25	4	0	0	2	0	0	0	0	0	0	2	0	6	0	0	1	0	0	0	0	0	0	0	0	0	0	0	0	0	0	0	1	9	0	0	0	0	0	0	0	0	0	0	0	0	0	5	0
MIKCC	HrMADS27	2	0	0	1	0	0	0	1	0	0	1	0	3	1	0	0	1	1	0	1	0	0	0	0	0	0	0	1	0	0	0	0	8	0	0	0	0	0	0	0	0	0	0	1	0	0	3	0
MIKCC	HrMADS30	0	0	0	0	0	1	0	0	1	0	0	0	1	0	0	0	2	0	0	0	0	0	0	0	0	0	0	0	0	0	0	0	1	0	0	0	0	0	0	0	0	0	0	0	0	0	0	1
MIKCC	HrMADS33	0	0	0	0	1	0	0	0	0	0	0	0	1	0	0	0	0	0	0	0	0	1	0	0	0	1	1	1	0	0	0	0	5	0	0	0	0	0	0	0	0	0	1	1	0	1	1	0
MIKCC	HrMADS34	1	0	0	1	0	0	0	0	0	0	1	0	2	0	0	0	1	0	0	0	0	0	0	0	0	0	0	1	0	0	0	0	2	0	0	0	0	0	1	1	0	0	0	0	0	3	1	0
MIKCC	HrMADS35	2	0	0	1	0	0	0	0	2	0	1	1	1	0	0	0	0	0	0	0	0	0	0	0	0	0	0	1	0	0	0	0	6	0	0	0	0	0	1	0	0	0	0	0	0	1	3	1
MIKCC	HrMADS36	4	0	0	0	0	1	0	0	1	0	0	1	2	0	1	0	1	0	0	0	0	0	0	0	0	0	0	1	0	0	0	0	13	0	0	0	0	0	2	0	0	0	0	0	0	3	4	0
MIKCC	HrMADS37	0	0	0	0	0	1	0	0	0	0	0	0	0	0	0	0	1	0	0	0	0	0	0	0	0	0	1	0	0	0	0	0	9	0	0	0	0	0	0	0	0	0	0	1	0	3	0	0
MIKCC	HrMADS41	0	0	0	1	0	0	0	0	0	0	1	0	3	0	0	0	0	0	0	0	0	0	0	0	0	0	1	1	0	0	1	0	6	0	0	0	2	1	1	0	0	0	1	0	0	0	0	0
MIKCC	HrMADS42	6	0	0	0	0	0	1	1	2	0	0	0	1	0	0	1	0	0	0	0	0	0	0	0	0	0	1	1	0	0	0	1	5	0	0	0	0	0	0	0	0	0	1	1	1	1	4	0
MIKCC	HrMADS43	0	0	0	0	0	1	0	0	0	0	0	2	3	0	1	0	0	0	0	0	0	1	0	0	0	0	0	1	0	0	0	0	6	0	0	1	0	0	0	0	0	0	1	0	1	1	0	0
MIKCC	HrMADS44	3	0	0	1	0	0	0	0	1	1	1	0	0	0	0	0	0	0	0	0	0	0	0	0	0	1	0	0	0	1	0	0	4	0	0	0	0	0	1	0	0	1	0	0	0	0	3	0
MIKCC	HrMADS47	3	0	0	0	0	1	0	0	0	0	0	0	4	0	0	1	0	0	0	0	0	0	0	0	0	0	1	0	0	0	1	1	3	0	0	0	0	0	3	0	0	0	0	1	0	0	3	0
MIKCC	HrMADS48	2	0	0	1	0	1	0	0	2	0	1	0	1	0	2	1	0	1	0	0	0	0	0	0	0	2	0	0	0	0	1	0	6	0	0	0	0	0	0	0	0	0	1	1	0	1	2	0
MIKCC	HrMADS50	1	0	0	0	0	1	0	0	1	0	0	0	2	0	0	0	1	0	0	0	0	0	0	1	0	0	0	0	0	2	0	0	6	0	0	0	0	0	2	0	0	0	0	0	0	0	1	0
MIKCC	HrMADS51	1	0	0	1	1	1	0	0	1	0	1	1	3	0	2	0	1	0	0	0	0	0	0	0	0	0	0	0	0	2	0	1	5	0	0	0	0	0	0	0	0	0	0	0	0	0	1	0
MIKCC	HrMADS52	2	1	0	1	0	1	0	0	2	0	1	0	3	0	0	1	0	0	0	0	0	0	0	0	0	1	0	1	0	1	0	0	8	0	0	0	1	0	0	0	0	0	1	0	0	1	3	0
MIKCC	HrMADS54	4	0	0	0	0	0	0	0	0	0	0	0	0	0	0	0	1	0	0	0	0	0	0	0	0	1	1	1	0	0	0	0	3	0	0	0	0	0	0	0	0	0	0	0	0	1	5	0
MIKCC	HrMADS55	0	0	0	0	0	0	0	0	0	0	0	0	4	0	1	1	1	0	0	0	0	0	0	0	0	0	0	0	0	0	1	0	3	0	0	0	0	0	1	0	0	0	0	0	0	1	1	0
MIKCC	HrMADS56	1	0	0	1	0	0	0	0	0	0	1	0	1	0	0	0	0	0	0	0	0	0	0	0	0	0	1	1	0	0	0	1	7	0	0	0	0	0	0	0	0	0	1	0	0	0	1	0
MIKCC	HrMADS59	4	0	0	0	1	0	0	0	0	0	0	1	1	0	0	0	1	0	0	0	0	0	0	0	1	0	0	0	0	0	0	0	5	0	0	0	2	0	0	0	0	0	0	1	0	0	6	0
MIKCC	HrMADS61	2	0	0	1	1	0	0	0	0	0	1	0	2	0	0	1	0	1	0	1	0	0	0	0	0	0	0	0	0	0	0	0	7	0	0	0	1	0	0	0	0	0	2	0	0	1	2	0
MIKCC	HrMADS62	1	0	0	2	0	0	0	1	2	0	2	0	2	0	0	1	0	0	0	0	0	0	0	0	0	0	1	0	0	0	0	0	8	0	0	0	0	0	0	0	0	0	0	0	0	2	2	0
MIKCC	HrMADS66	6	0	0	1	0	0	0	0	2	0	1	0	1	0	0	1	0	0	0	0	0	0	0	0	0	0	1	0	0	0	0	0	0	0	0	0	1	0	0	0	0	0	0	0	0	0	7	0
MIKCC	HrMADS68	0	0	0	0	0	1	0	0	1	0	0	0	2	0	0	0	0	0	0	0	0	0	0	0	0	0	0	0	0	0	0	0	5	0	0	0	1	0	0	0	0	0	0	0	0	0	1	0
MIKCC	HrMADS69	1	0	0	0	1	1	0	1	0	0	0	0	2	0	1	0	0	1	0	0	0	0	0	0	0	0	2	0	0	1	0	0	3	0	1	0	0	0	0	0	0	0	0	0	0	1	1	0
MIKCC	HrMADS72	4	0	0	1	0	0	0	0	0	1	1	0	2	0	0	0	1	0	0	0	0	1	0	0	0	0	0	0	0	1	0	0	5	0	0	0	0	0	1	0	0	0	1	1	0	0	3	0
MIKCC	HrMADS76	1	0	0	2	0	0	0	0	1	0	2	0	2	0	1	1	0	0	0	0	0	0	0	0	0	0	1	0	0	0	0	0	11	0	0	0	0	0	0	0	0	0	1	2	0	0	1	0
MIKCC	HrMADS78	2	0	0	1	0	0	0	0	0	0	1	0	2	0	0	0	1	0	1	0	0	0	0	0	0	1	0	0	0	0	0	0	4	0	0	0	0	1	1	0	0	0	0	2	0	0	3	0
MIKCC	HrMADS81	0	0	0	0	0	0	0	0	0	0	0	0	1	0	0	0	0	0	0	0	0	0	0	0	0	0	0	0	0	0	0	0	11	0	0	0	0	0	1	0	0	0	1	0	1	0	0	0
MIKCC	HrMADS84	1	0	0	1	0	0	0	0	1	0	1	0	2	0	0	0	2	0	0	0	0	0	0	0	0	0	0	0	1	0	1	0	1	0	0	0	0	0	0	0	0	0	0	0	0	4	1	0
MIKCC	HrMADS85	0	0	0	3	0	1	0	0	0	0	3	1	6	0	1	0	2	0	0	0	0	0	0	0	0	0	0	0	0	0	0	0	4	0	0	0	0	0	0	0	0	0	1	1	0	0	0	0
MIKCC	HrMADS88	1	0	0	0	0	0	0	0	0	0	0	0	1	0	0	1	0	0	0	0	0	0	0	0	0	0	1	0	0	0	0	0	7	0	0	0	0	0	0	0	0	0	0	1	0	1	1	0
MIKCC	HrMADS89	7	0	0	1	0	0	0	0	1	0	1	1	1	0	0	0	0	0	0	0	0	0	0	0	0	1	0	0	0	1	0	0	3	0	0	0	1	0	1	0	0	0	0	0	0	0	7	0
MIKCC	HrMADS91	1	0	0	1	0	0	0	0	0	0	1	1	3	0	0	1	0	0	0	0	0	0	0	0	0	0	0	0	0	0	0	1	6	0	0	0	1	0	0	0	0	0	0	0	1	0	1	0
		138	2	5	72	19	39	1	15	52	4	72	23	188	2	25	34	53	10	1	9	1	6	1	5	2	13	47	27	5	25	13	21	451	6	4	3	25	10	29	3	1	1	31	37	10	64	156	12
[truncated: 16 more columns]

## Sheet: Table S8
Table S8 Number of cis-acting elements in the promoter region of Hippophae rhamnoides ssp. sinensis ABCDE model genes
Class	Gene Name	Hormone response Cis-acting Elements												Stress response Cis-acting Elements						Stress response Cis-acting Elements
		ABRE	AuxRE	AuxRR-core	CGTCA-motif	GARE-motif	P-box	SARE	TATC-box	TCA-element	TGA-box	TGACG-motif	TGA-element	ARE	GC-motif	LTR	MBS	TC-rich repeats	WUN-motif	3-AF3 binding site	3-AF1 binding site	4cl-CMA1c	AAAC-motif	AACA_motif	A-box	ACA-motif	ACE	AE-box	AT1-motif	ATC-motif	ATCT-motif	AT-rich sequence	AT-rich element	Box 4	Box II	Box III	CAG-motif	CAT-box	CCAAT-box	chs-CMA1a	chs-CMA2a	chs-CMA2c	chs-Unit 1 m1	circadian	GA-motif	Gap-box	GATA-motif	G-Box	GCN4_motif
class A	HrMADS25	4	0	0	2	0	0	0	0	0	0	2	0	6	0	0	1	0	0	0	0	0	0	0	0	0	0	0	0	0	0	0	1	9	0	0	0	0	0	0	0	0	0	0	0	0	0	5	0
class A	HrMADS34	1	0	0	1	0	0	0	0	0	0	1	0	2	0	0	0	1	0	0	0	0	0	0	0	0	0	0	1	0	0	0	0	2	0	0	0	0	0	1	1	0	0	0	0	0	3	1	0
class A	HrMADS51	1	0	0	1	1	1	0	0	1	0	1	1	3	0	2	0	1	0	0	0	0	0	0	0	0	0	0	0	0	2	0	1	5	0	0	0	0	0	0	0	0	0	0	0	0	0	1	0
class A	HrMADS61	2	0	0	2	2	0	0	0	0	0	2	0	2	0	0	1	0	1	0	1	0	0	0	0	0	0	0	0	0	0	0	0	7	0	0	0	1	0	0	0	0	0	2	0	0	1	2	0
class A	HrMADS85	0	0	0	3	0	1	0	0	0	0	3	1	6	0	1	0	2	0	0	0	0	0	0	0	0	0	0	0	0	0	0	0	4	0	0	0	0	0	0	0	0	0	1	1	0	0	0	0
class A	HrMADS86	0	0	0	1	0	1	0	0	0	0	1	0	1	0	0	0	0	0	0	1	0	0	0	0	0	0	0	0	0	2	0	1	9	0	0	0	0	0	0	0	0	0	0	2	0	0	0	0
class B	HrMADS55	0	0	0	0	0	0	0	0	0	0	0	0	4	0	1	1	1	0	0	0	0	0	0	0	0	0	0	0	0	0	1	0	3	0	0	0	0	0	1	0	0	0	0	0	0	1	1	0
class B	HrMADS56	1	0	0	1	0	0	0	0	0	0	1	0	1	0	0	0	0	0	0	0	0	0	0	0	0	0	1	1	0	0	0	1	7	0	0	0	0	0	0	0	0	0	1	0	0	0	1	0
class B	HrMADS78	2	0	0	1	0	0	0	0	0	0	1	0	2	0	0	0	1	0	1	0	0	0	0	0	0	1	0	0	0	0	0	0	4	0	0	0	0	1	1	0	0	0	0	2	0	0	3	0
class B	HrMADS42	6	0	0	0	0	0	1	1	2	0	0	0	1	0	0	1	0	0	0	0	0	0	0	0	0	0	1	1	0	0	0	1	5	0	0	0	0	0	0	0	0	0	1	1	1	1	4	0
class B	HrMADS62	1	0	0	2	0	0	0	1	2	0	2	0	2	0	0	1	0	0	0	0	0	0	0	0	0	0	1	0	0	0	0	0	8	0	0	0	0	0	0	0	0	0	0	0	0	2	2	0
class C	HrMADS10	2	0	0	0	0	1	0	1	0	0	0	1	2	0	0	0	1	0	0	0	0	0	0	0	0	0	1	0	0	1	0	0	5	0	0	0	0	0	1	0	0	0	0	0	0	1	1	0
class C	HrMADS20	3	0	0	0	0	0	0	0	0	0	0	0	1	0	0	0	2	0	0	0	0	0	0	0	0	0	0	0	0	0	0	0	4	0	0	0	0	0	0	1	0	0	0	0	0	1	3	0
class C	HrMADS50	1	0	0	0	0	1	0	0	1	0	0	0	2	0	0	0	1	0	0	0	0	0	0	1	0	0	0	0	0	2	0	0	6	0	0	0	0	0	2	0	0	0	0	0	0	0	1	0
class D	HrMADS5	2	0	0	1	1	0	0	0	0	0	1	0	4	0	2	0	0	0	0	0	0	0	0	0	0	0	0	0	0	0	0	1	12	0	0	0	0	0	0	0	0	0	0	0	1	2	2	0
class D	HrMADS69	1	0	0	0	1	1	0	1	0	0	0	0	2	0	1	0	0	1	0	0	0	0	0	0	0	0	2	0	0	1	0	0	3	0	1	0	0	0	0	0	0	0	0	0	0	1	1	0
class E	HrMADS12	1	0	0	1	0	1	0	1	1	0	1	0	1	0	0	1	0	0	0	0	0	0	0	1	0	0	0	0	0	0	1	0	3	0	0	0	0	0	0	0	0	0	1	0	0	3	2	1
class E	HrMADS13	0	1	0	2	0	0	0	0	1	0	2	0	2	0	0	0	1	0	0	0	0	0	0	0	0	1	1	0	0	0	0	0	3	0	0	0	1	0	0	0	0	0	0	4	0	0	0	0
class E	HrMADS19	0	0	0	2	0	0	0	0	0	0	2	0	4	0	0	0	2	0	0	0	0	0	0	0	0	0	2	0	0	1	1	0	6	0	0	0	1	0	0	0	0	0	0	2	0	1	0	0
class E	HrMADS35	2	0	0	1	0	0	0	0	2	0	1	1	1	0	0	0	0	0	0	0	0	0	0	0	0	0	0	1	0	0	0	0	6	0	0	0	0	0	1	0	0	0	0	0	0	1	3	1
class E	HrMADS44	3	0	0	1	0	0	0	0	1	1	1	0	0	0	0	0	0	0	0	0	0	0	0	0	0	1	0	0	0	1	0	0	4	0	0	0	0	0	1	0	0	1	0	0	0	0	3	0
class E	HrMADS47	3	0	0	0	0	1	0	0	0	0	0	0	4	0	0	1	0	0	0	0	0	0	0	0	0	0	1	0	0	0	1	1	3	0	0	0	0	0	3	0	0	0	0	1	0	0	3	0
class E	HrMADS52	2	1	0	1	0	1	0	0	2	0	1	0	3	0	0	1	0	0	0	0	0	0	0	0	0	1	0	1	0	1	0	0	8	0	0	0	1	0	0	0	0	0	1	0	0	1	3	0
class E	HrMADS59	4	0	0	0	1	0	0	0	0	0	0	1	1	0	0	0	1	0	0	0	0	0	0	0	1	0	0	0	0	0	0	0	5	0	0	0	2	0	0	0	0	0	0	1	0	0	6	0
class E	HrMADS60	0	0	0	0	0	0	0	1	0	0	0	0	1	0	0	0	0	1	0	1	0	0	0	0	0	0	1	1	0	0	0	0	10	0	0	0	0	0	0	0	0	0	0	0	0	0	0	0
class E	HrMADS89	7	0	0	1	0	0	0	0	1	0	1	1	1	0	0	0	0	0	0	0	0	0	0	0	0	1	0	0	0	1	0	0	3	0	0	0	1	0	1	0	0	0	0	0	0	0	7	0
AGL6	HrMADS81	0	0	0	0	0	0	0	0	0	0	0	0	1	0	0	0	0	0	0	0	0	0	0	0	0	0	0	0	0	0	0	0	11	0	0	0	0	0	1	0	0	0	1	0	1	0	0	0
[truncated: 16 more columns]

## Sheet: Table S9
Table S9 FPKM values of the MADS-box gene in male and female flowers of Hippophae rhamnoides ssp. sinensis
Gene Name	Class	Hrh-F-1	Hrh-F-2	Hrh-F-3	Hrh-M-1	Hrh-M-2	Hrh-M-3
HrMADS26	Mα	0.836699	0.424059	0.982806	0.923754	0.91221	0.421279
HrMADS29	Mα	10.4587	12.0402	10.9981	7.1638	5.86421	8.92709
HrMADS32	Mα	0	0	0	0	0	0
HrMADS71	Mα	0	0	0.277791	0	0.165752	0
HrMADS79	Mα	2.20584	2.79493	1.43946	29.0503	40.2824	47.3875
HrMADS83	Mα	0.331479	0.0840008	0.17305	2.61406	1.56604	2.55913
HrMADS2	Mβ	9.59671	10.3282	13.1126	2.84034	5.33904	2.7043
HrMADS4	Mβ	38.2524	37.9485	38.1909	21.1341	18.689	20.4834
HrMADS6	Mβ	0.848401	0.752482	0.55364	0	0.616646	0.14239
HrMADS9	Mβ	1.18684	1.60405	1.23919	0.332781	0.191696	0.354118
HrMADS11	Mβ	10.7608	9.94369	10.9219	9.53587	11.2772	11.5585
HrMADS13	Mβ	20.496	23.5706	23.7991	117.941	149.907	117.235
HrMADS17	Mβ	0	0	0	0	0	0
HrMADS18	Mβ	0	0	0	0	0	0
HrMADS22	Mβ	36.2354	36.8659	36.8528	11.5148	11.9004	12.6135
HrMADS24	Mβ	22.3578	19.0615	19.3628	16.7294	14.9907	16.1731
HrMADS28	Mβ	19.5822	17.76	19.6773	19.1349	20.2258	17.2976
HrMADS31	Mβ	0.518467	0.919701	1.35334	2.1261	0.753678	3.48065
HrMADS39	Mβ	4.83084	5.51661	5.55471	1.38882	1.95561	1.64208
HrMADS40	Mβ	2.58631	1.9662	2.27078	1.40916	2.2216	3.55148
HrMADS45	Mβ	0	0	0.157553	0	0	0
HrMADS49	Mβ	0	0	0	0	0	0
HrMADS53	Mβ	27.9771	36.1775	38.4933	46.1877	31.9274	39.8459
HrMADS57	Mβ	13.5297	12.6594	11.177	5.44031	10.3742	8.5839
HrMADS60	Mβ	13.0265	13.697	15.3266	2.82117	1.9784	2.61049
HrMADS63	Mβ	19.7294	18.8048	20.2923	13.0972	11.1296	14.1346
HrMADS64	Mβ	10.1951	12.3365	11.809	7.15549	8.98476	11.0364
HrMADS65	Mβ	76.3137	74.0583	74.416	117.272	118.441	119.551
HrMADS67	Mβ	0.342716	0	0.0894582	0.540534	1.49458	1.03535
HrMADS70	Mβ	27.2195	29.7589	28.2679	23.428	26.2139	25.1259
HrMADS73	Mβ	0.270807	0.0457504	0.377002	0.797287	1.70587	1.87862
HrMADS77	Mβ	21.4874	18.1366	19.6308	24.453	19.1017	24.8003
HrMADS80	Mβ	15.8545	18.7726	14.2027	8.34977	9.08524	9.74898
HrMADS86	Mβ	10.584	6.56518	10.3911	6.3783	9.41508	5.51465
HrMADS87	Mβ	12.5277	12.4314	10.8773	18.3029	12.2686	21.07
HrMADS92	Mβ	0.0456782	0	0	0.979799	1.72642	0.919961
HrMADS15	Mγ	0	0	0	0	0	0
HrMADS16	Mγ	0	0	0	0	0	0
HrMADS38	Mγ	0	0	0	0.159457	0.275563	0
HrMADS58	Mγ	0.986352	1.68719	0.836762	0	0	0
HrMADS74	Mγ	0	0	0	0	0	0
HrMADS82	Mγ	0.966408	1.09263	0.620945	4.50233	4.10644	3.64316
HrMADS14	MIKC*	0.0864112	0.175181	0.135334	8.39537	13.2522	11.3121
HrMADS46	MIKC*	5.31394	6.13228	7.68231	46.8315	53.2409	54.664
HrMADS75	MIKC*	0	0	0	123.59	148.246	148.139
HrMADS90	MIKC*	9.56396	9.57862	9.94605	40.6737	51.2354	51.3138
HrMADS1	MIKCC	0	0.0760997	0.0783867	0	0	0
HrMADS3	MIKCC	7.48897	8.54008	11.729	1.18117	0.544323	2.5138
HrMADS5	MIKCC	8.80121	11.4605	11.6635	1.87932	0.88574	1.18171
HrMADS7	MIKCC	4.41518	0.389168	5.61209	0.484428	1.11621	2.06195
HrMADS8	MIKCC	6.71874	6.22669	7.21554	0.968856	3.34862	3.86616
HrMADS10	MIKCC	18.4673	15.6821	17.7495	77.6969	83.9135	86.1271
HrMADS12	MIKCC	11.9988	17.5682	12.3541	55.0917	53.2958	53.0302
HrMADS19	MIKCC	31.7689	32.2025	30.4791	17.471	17.5141	20.9252
HrMADS20	MIKCC	8.24331	10.2056	11.3664	26.7571	35.8576	36.5836
HrMADS21	MIKCC	0.417938	0.302601	0.748068	2.26003	1.90942	1.76362
HrMADS23	MIKCC	19.146	15.5643	18.803	2.63105	2.48007	0.763567
HrMADS25	MIKCC	69.7088	82.4799	75.9106	28.7023	29.4552	30.286
HrMADS27	MIKCC	78.5514	77.2857	73.7709	8.28885	7.51768	6.47449
HrMADS30	MIKCC	0.623226	0	0	3.14546	5.43577	2.78929
HrMADS33	MIKCC	0.547479	1.05441	0.40014	7.39146	9.15229	8.8945
HrMADS34	MIKCC	191.164	201.399	201.637	68.6166	57.2655	70.2323
HrMADS35	MIKCC	15.3509	15.4976	16.8035	53.2653	60.6465	55.7664
HrMADS36	MIKCC	0	0	0	3.4958	4.13345	1.4684
HrMADS37	MIKCC	0.64408	0.94963	1.34498	1.4776	2.38325	3.38053
HrMADS41	MIKCC	2.18129	2.52693	0.976075	0.655305	1.66093	2.23143
HrMADS42	MIKCC	0	0	0	129.497	136.918	134.608
HrMADS43	MIKCC	31.8468	30.4648	32.0281	13.7423	13.9285	13.7905
HrMADS44	MIKCC	34.35	38.6464	39.1719	26.128	29.2164	31.6467
HrMADS47	MIKCC	10.2334	10.748	10.6848	63.0829	70.4367	66.3
HrMADS48	MIKCC	29.3096	36.4349	35.6267	13.7992	16.7458	14.8798
HrMADS50	MIKCC	26.6012	23.3102	28.5533	81.1665	107.334	117.998
HrMADS51	MIKCC	2.15461	1.00801	1.90355	0.941061	0.602325	1.0014
HrMADS52	MIKCC	18.0744	16.878	16.7389	39.207	34.3723	39.7263
HrMADS54	MIKCC	29.0666	26.1692	22.2431	26.4244	23.3573	18.9074
HrMADS55	MIKCC	5.92877	6.19946	4.95223	64.0192	55.8838	61.3368
HrMADS56	MIKCC	8.04682	10.1958	11.8756	76.6372	74.3459	75.9412
HrMADS59	MIKCC	3.39519	3.21209	4.01761	0.571191	0.658062	0
HrMADS61	MIKCC	26.6783	26.7287	28.3075	46.08	31.223	31.6647
HrMADS62	MIKCC	0	0	0	48.2304	52.5458	48.8125
HrMADS66	MIKCC	0.337004	0	0	0.85044	0	0.150828
HrMADS68	MIKCC	0.298821	0.227174	0.390003	0.0942606	0.977368	0.501522
HrMADS69	MIKCC	10.4009	11.155	10.7896	0.0846677	0	0
HrMADS72	MIKCC	32.63	38.3673	34.6533	8.39112	12.1067	9.6802
HrMADS76	MIKCC	0	0	0	0	0	0
HrMADS78	MIKCC	5.3953	6.79922	4.56753	28.8863	27.3444	28.7806
HrMADS81	MIKCC	10.3371	9.59974	9.30658	42.4873	42.6505	37.4823
HrMADS84	MIKCC	94.2136	98.1895	103.054	12.9958	11.5737	13.7442
HrMADS85	MIKCC	7.26219	5.41272	9.14364	13.4753	8.07285	11.1847
HrMADS88	MIKCC	14.7235	13.7305	17.9863	25.2655	18.8346	19.7687
HrMADS89	MIKCC	81.0057	86.2231	82.5589	386.005	468.662	493.04
HrMADS91	MIKCC	0	0.207732	0.213974	0.905029	1.78744	1.23822

## Sheet: Table S10
Table S10 FPKM values of the ABCDE model MADS-box gene in male and female flowers of Hippophae rhamnoides ssp. sinensis
Gene Name	Class	Hrh-F-1	Hrh-F-2	Hrh-F-3	Hrh-M-1	Hrh-M-2	Hrh-M-3
HrMADS25	class A	69.7088	82.4799	75.9106	28.7023	29.4552	30.286
HrMADS34	class A	191.164	201.399	201.637	68.6166	57.2655	70.2323
HrMADS51	class A	2.15461	1.00801	1.90355	0.941061	0.602325	1.0014
HrMADS61	class A	26.6783	26.7287	28.3075	46.08	31.223	31.6647
HrMADS85	class A	7.26219	5.41272	9.14364	13.4753	8.07285	11.1847
HrMADS86	class A	10.584	6.56518	10.3911	6.3783	9.41508	5.51465
HrMADS55	class B	5.92877	6.19946	4.95223	64.0192	55.8838	61.3368
HrMADS56	class B	8.04682	10.1958	11.8756	76.6372	74.3459	75.9412
HrMADS78	class B	5.3953	6.79922	4.56753	28.8863	27.3444	28.7806
HrMADS42	class B	0	0	0	129.497	136.918	134.608
HrMADS62	class B	0	0	0	48.2304	52.5458	48.8125
HrMADS10	class C	18.4673	15.6821	17.7495	77.6969	83.9135	86.1271
HrMADS20	class C	8.24331	10.2056	11.3664	26.7571	35.8576	36.5836
HrMADS50	class C	26.6012	23.3102	28.5533	81.1665	107.334	117.998
HrMADS5	class D	8.80121	11.4605	11.6635	1.87932	0.88574	1.18171
HrMADS69	class D	10.4009	11.155	10.7896	0.0846677	0	0
HrMADS12	class E	11.9988	17.5682	12.3541	55.0917	53.2958	53.0302
HrMADS13	class E	20.496	23.5706	23.7991	117.941	149.907	117.235
HrMADS19	class E	31.7689	32.2025	30.4791	17.471	17.5141	20.9252
HrMADS35	class E	15.3509	15.4976	16.8035	53.2653	60.6465	55.7664
HrMADS44	class E	34.35	38.6464	39.1719	26.128	29.2164	31.6467
HrMADS47	class E	10.2334	10.748	10.6848	63.0829	70.4367	66.3
HrMADS52	class E	18.0744	16.878	16.7389	39.207	34.3723	39.7263
HrMADS59	class E	3.39519	3.21209	4.01761	0.571191	0.658062	0
HrMADS60	class E	13.0265	13.697	15.3266	2.82117	1.9784	2.61049
HrMADS89	class E	81.0057	86.2231	82.5589	386.005	468.662	493.04
HrMADS81	AGL6	10.3371	9.59974	9.30658	42.4873	42.6505	37.4823

[truncated: 1 more sheets: Table S11]
